# Supplementary material for: Ozone source attribution in polluted European areas during summer 2017 as simulated with MECO(n)
Source: Copernicus journal article supplement (doi:10.5194/acp-24-13503-2024), 2024-12-09
Supplement: Supplementary file 1 [file acp-24-13503-2024-supplement.zip]

# The Chemical Mechanism of MECCA

KPP version: 2.2.3\_rs3

MECCA version: 4.4.0.m1

Date: August 3, 2022

Batch file: CCMI2-base-02-tag.bat

Integrator: rosenbrock\_mz

Gas equation file: gas.eqn

Replacement file: mim1-CCMI2-base-02

Selected reactions:

“(((Tr && (G || Het) && !I) || St) && !Hg)”

Number of aerosol phases: 0

Number of species in selected mechanism:

Gas phase: 205

Aqueous phase: 0

All species: 205

Number of reactions in selected mechanism:

Gas phase (Gnnn): 265

Aqueous phase (Annn): 0

Henry (Hnnn): 0

Photolysis (Jnnn): 82

Aqueous phase photolysis (PHnnn): 0

Heterogeneous (HETnnn): 12

Equilibria (EQnn): 0

Isotope exchange (IEXnnn): 0

Tagging equations (TAGnnn): 0

Dummy (Dnn): 0

All equations: 359



Table 1: Gas phase reactions

| #      | labels   | reaction                                                                                                                                                    | rate coefficient                                       | reference                 |
|--------|----------|-------------------------------------------------------------------------------------------------------------------------------------------------------------|--------------------------------------------------------|---------------------------|
| G1000  | UpStTrG  | $O_2 + O(^1D) \rightarrow O(^3P) + O_2$                                                                                                                     | $3.3E-11 * EXP(55./temp)$                              | Burkholder et al. (2015)  |
| G1001  | UpStTrG  | $O_2 + O(^3P) \rightarrow O_3$                                                                                                                              | $6.0E-34 * ((temp/300.) ** (-2.4)) * cair$             | Burkholder et al. (2015)  |
| G1002a | UpStG    | $O_3 + O(^1D) \rightarrow 2.0 \text{ o3lossxo} + 2.0 \text{ LossO3O} + 2.0 \text{ LossO3} + 2 O_2$                                                          | $1.2E-10$                                              | Burkholder et al. (2015)* |
| G1003  | UpStG    | $O_3 + O(^3P) \rightarrow 2.0 \text{ o3lossxo} + 2.0 \text{ LossO3O} + 2.0 \text{ LossO3} + 2 O_2$                                                          | $8.0E-12 * EXP(-2060./temp)$                           | Burkholder et al. (2015)  |
| G2100  | UpStTrG  | $H + O_2 \rightarrow 1.0 \text{ LossG2100} + HO_2$                                                                                                          | $k\_3rd(temp, cair, 4.4E-32, 1.3, 7.5E-11, -0.2, 0.6)$ | Burkholder et al. (2015)  |
| G2101  | UpStG    | $H + O_3 \rightarrow 1.0 \text{ o3lossxo} + 1.0 \text{ LossO3H} + 1.0 \text{ LossO3} + OH + O_2$                                                            | $1.4E-10 * EXP(-470./temp)$                            | Burkholder et al. (2015)  |
| G2102  | UpStG    | $H_2 + O(^1D) \rightarrow 1.0 \text{ o3lossxo} + 1.0 \text{ LossO3H} + 1.0 \text{ LossO3} + H + OH$                                                         | $1.2E-10$                                              | Burkholder et al. (2015)  |
| G2103  | UpStG    | $OH + O(^3P) \rightarrow 1.0 \text{ LossG2103} + 1.0 \text{ o3lossoh} + 1.0 \text{ LossO3H} + 1.0 \text{ LossO3} + H + O_2$                                 | $1.8E-11 * EXP(180./temp)$                             | Burkholder et al. (2015)  |
| G2104  | UpStTrG  | $OH + O_3 \rightarrow 1.0 \text{ LossG2104} + 1.0 \text{ o3lossoh} + 1.0 \text{ LossO3H} + \text{LossOH} + 1.0 \text{ LossO3} + HO_2 + O_2$                 | $1.7E-12 * EXP(-940./temp)$                            | Burkholder et al. (2015)  |
| G2105  | UpStTrG  | $OH + H_2 \rightarrow 1.0 \text{ LossG2105} + \text{ProdH2O} + H_2O + H$                                                                                    | $2.8E-12 * EXP(-1800./temp)$                           | Burkholder et al. (2015)  |
| G2106  | UpStG    | $HO_2 + O(^3P) \rightarrow 1. \text{ LossG2106} + 1.0 \text{ o3lossho2} + 1.0 \text{ LossO3H} + 1.0 \text{ LossO3} + OH + O_2$                              | $3.E-11 * EXP(200./temp)$                              | Burkholder et al. (2015)  |
| G2107  | UpStTrG  | $HO_2 + O_3 \rightarrow 1. \text{ LossG2107} + 1.0 \text{ o3lossho2} + 1.0 \text{ LossO3H} + \text{LossHO2} + 1.0 \text{ LossO3} + OH + 2 O_2$              | $1.E-14 * EXP(-490./temp)$                             | Burkholder et al. (2015)  |
| G2108a | UpStG    | $HO_2 + H \rightarrow 2 OH$                                                                                                                                 | $7.2E-11$                                              | Burkholder et al. (2015)  |
| G2108b | UpStG    | $HO_2 + H \rightarrow H_2 + O_2$                                                                                                                            | $6.9E-12$                                              | Burkholder et al. (2015)  |
| G2108c | UpStG    | $HO_2 + H \rightarrow 1.0 \text{ o3prodh2o} + \text{ProdH2O} + 1.0 \text{ ProdO3} + O(^3P) + H_2O$                                                          | $1.6E-12$                                              | Burkholder et al. (2015)  |
| G2109  | UpStTrG  | $HO_2 + OH \rightarrow 1. \text{ LossG2109} + \text{ProdH2O} + H_2O + O_2$                                                                                  | $4.8E-11 * EXP(250./temp)$                             | Burkholder et al. (2015)  |
| G2110  | UpStTrG  | $HO_2 + HO_2 \rightarrow 1. \text{ LossG2110} + H_2O_2 + O_2$                                                                                               | $k\_H02\_H02$                                          | Burkholder et al. (2015)* |
| G2111  | UpStTrG  | $H_2O + O(^1D) \rightarrow 1. \text{ LossG2111} + 1.0 \text{ o3lossxo} + \text{LossH2O} + 1.0 \text{ LossO3O} + \text{LossO1D} + 1.0 \text{ LossO3} + 2 OH$ | $1.63E-10 * EXP(60./temp)$                             | Burkholder et al. (2015)  |
| G2112  | UpStTrG  | $H_2O_2 + OH \rightarrow 1. \text{ LossG2112} + \text{ProdH2O} + H_2O + HO_2$                                                                               | $1.8E-12$                                              | Burkholder et al. (2015)  |
| G3100  | UpStGN   | $N + O_2 \rightarrow 1.0 \text{ o3prodn2} + 1.0 \text{ ProdO3} + NO + O(^3P)$                                                                               | $1.5E-11 * EXP(-3600./temp)$                           | Burkholder et al. (2015)  |
| G3101  | UpStTrGN | $N_2 + O(^1D) \rightarrow O(^3P) + N_2$                                                                                                                     | $2.15E-11 * EXP(110./temp)$                            | Burkholder et al. (2015)  |



Table 1: Gas phase reactions (... continued)

| #      | labels   | reaction                                                                                                                                                       | rate coefficient                                                                          | reference                 |
|--------|----------|----------------------------------------------------------------------------------------------------------------------------------------------------------------|-------------------------------------------------------------------------------------------|---------------------------|
| G3102a | UpStGN   | $\text{N}_2\text{O} + \text{O}(^1\text{D}) \rightarrow 1.0 \text{ o3lossxo} + \text{noprodN2O} + 1.0 \text{ LossO3O}$<br>$+ 1.0 \text{ LossO3} + 2 \text{ NO}$ | $7.259\text{E-}11 \cdot \text{EXP}(20./\text{temp})$                                      | Burkholder et al. (2015)  |
| G3102b | StGN     | $\text{N}_2\text{O} + \text{O}(^1\text{D}) \rightarrow 1.0 \text{ o3lossxo} + 1.0 \text{ LossO3O} + 1.0 \text{ LossO3}$<br>$+ \text{N}_2 + \text{O}_2$         | $4.641\text{E-}11 \cdot \text{EXP}(20./\text{temp})$                                      | Burkholder et al. (2015)  |
| G3103  | UpStTrGN | $\text{NO} + \text{O}_3 \rightarrow \text{NO}_2 + \text{O}_2$                                                                                                  | $3.0\text{E-}12 \cdot \text{EXP}(-1500./\text{temp})$                                     | Burkholder et al. (2015)  |
| G3104  | UpStGN   | $\text{NO} + \text{N} \rightarrow 1.0 \text{ o3prodnoy} + 1.0 \text{ ProdO3} + \text{O}(^3\text{P}) + \text{N}_2$                                              | $2.1\text{E-}11 \cdot \text{EXP}(100./\text{temp})$                                       | Burkholder et al. (2015)  |
| G3105  | UpStGN   | $\text{NO}_2 + \text{O}(^3\text{P}) \rightarrow 2.0 \text{ o3lossno} + 2.0 \text{ LossO3N} + 2.0 \text{ LossO3}$<br>$+ \text{NO} + \text{O}_2$                 | $5.1\text{E-}12 \cdot \text{EXP}(210./\text{temp})$                                       | Burkholder et al. (2015)  |
| G3106  | StTrGN   | $\text{NO}_2 + \text{O}_3 \rightarrow \text{NO}_3 + \text{O}_2$                                                                                                | $1.2\text{E-}13 \cdot \text{EXP}(-2450./\text{temp})$                                     | Burkholder et al. (2015)  |
| G3107  | UpStGN   | $\text{NO}_2 + \text{N} \rightarrow \text{N}_2\text{O} + \text{O}(^3\text{P})$                                                                                 | $5.8\text{E-}12 \cdot \text{EXP}(220./\text{temp})$                                       | Burkholder et al. (2015)  |
| G3108  | StTrGN   | $\text{NO}_3 + \text{NO} \rightarrow 2 \text{ NO}_2$                                                                                                           | $1.5\text{E-}11 \cdot \text{EXP}(170./\text{temp})$                                       | Burkholder et al. (2015)  |
| G3109  | UpStTrGN | $\text{NO}_3 + \text{NO}_2 \rightarrow \text{N}_2\text{O}_5$                                                                                                   | $k_{\text{N03\_N02}}$                                                                     | Burkholder et al. (2015)* |
| G3110  | StTrGN   | $\text{N}_2\text{O}_5 \rightarrow \text{NO}_2 + \text{NO}_3$                                                                                                   | $k_{\text{N03\_N02}} / (5.8\text{E-}27 \cdot \text{EXP}(10840./\text{temp}))$             | Burkholder et al. (2015)* |
| G3200  | TrGN     | $\text{NO} + \text{OH} \rightarrow 1. \text{ LossG3200} + \text{HONO}$                                                                                         | $k_{\text{3rd}}(\text{temp}, \text{cair}, 7.0\text{E-}31, 2.6, 3.6\text{E-}11, 0.1, 0.6)$ | Burkholder et al. (2015)  |
| G3201  | UpStTrGN | $\text{NO} + \text{HO}_2 \rightarrow 1. \text{ LossG3201} + 1.0 \text{ o3prodho2noy} + \text{ProdHO2} + 1.0 \text{ ProdO3} + \text{NO}_2 + \text{OH}$          | $3.3\text{E-}12 \cdot \text{EXP}(270./\text{temp})$                                       | Burkholder et al. (2015)  |
| G3202  | UpStTrGN | $\text{NO}_2 + \text{OH} \rightarrow 1. \text{ LossG3202} + \text{HNO}_3$                                                                                      | $k_{\text{3rd}}(\text{temp}, \text{cair}, 1.8\text{E-}30, 3.0, 2.8\text{E-}11, 0., 0.6)$  | Burkholder et al. (2015)  |
| G3203  | StTrGN   | $\text{NO}_2 + \text{HO}_2 \rightarrow 1. \text{ LossG3203} + \text{HNO}_4$                                                                                    | $k_{\text{N02\_H02}}$                                                                     | Burkholder et al. (2015)* |
| G3204  | TrGN     | $\text{NO}_3 + \text{HO}_2 \rightarrow 1.0 \text{ o3lossno} + 1.0 \text{ LossO3N} + 1.0 \text{ LossO3}$<br>$+ \text{NO}_2 + \text{OH} + \text{O}_2$            | $3.5\text{E-}12$                                                                          | Burkholder et al. (2015)  |
| G3205  | TrGN     | $\text{HONO} + \text{OH} \rightarrow 1.0 \text{ o3prodohnoy} + \text{ProdH2O} + 1.0 \text{ ProdO3} + \text{NO}_2 + \text{H}_2\text{O}$                         | $1.8\text{E-}11 \cdot \text{EXP}(-390./\text{temp})$                                      | Burkholder et al. (2015)  |
| G3206  | StTrGN   | $\text{HNO}_3 + \text{OH} \rightarrow 1.0 \text{ o3prodohnoy} + \text{ProdH2O} + 1.0 \text{ ProdO3} + \text{H}_2\text{O} + \text{NO}_3$                        | $k_{\text{HN03\_OH}}$                                                                     | Dulitz et al. (2018)*     |
| G3207  | StTrGN   | $\text{HNO}_4 \rightarrow 1. \text{ LossG3207} + \text{NO}_2 + \text{HO}_2$                                                                                    | $k_{\text{N02\_H02}} / (2.1\text{E-}27 \cdot \text{EXP}(10900./\text{temp}))$             | Burkholder et al. (2015)* |
| G3208  | StTrGN   | $\text{HNO}_4 + \text{OH} \rightarrow \text{ProdH2O} + \text{NO}_2 + \text{H}_2\text{O}$                                                                       | $1.3\text{E-}12 \cdot \text{EXP}(380./\text{temp})$                                       | Burkholder et al. (2015)  |
| G3209  | TrGN     | $\text{NH}_3 + \text{OH} \rightarrow \text{ProdH2O} + \text{NH}_2 + \text{H}_2\text{O}$                                                                        | $1.7\text{E-}12 \cdot \text{EXP}(-710./\text{temp})$                                      | Kohlmann and Poppe (1999) |
| G3210  | TrGN     | $\text{NH}_2 + \text{O}_3 \rightarrow 1.0 \text{ o3lossxo} + 1.0 \text{ LossO3N} + 1.0 \text{ LossO3} + \text{NH}_2\text{O} + \text{O}_2$                      | $4.3\text{E-}12 \cdot \text{EXP}(-930./\text{temp})$                                      | Kohlmann and Poppe (1999) |
| G3211  | TrGN     | $\text{NH}_2 + \text{HO}_2 \rightarrow \text{NH}_2\text{O} + \text{OH}$                                                                                        | $4.8\text{E-}07 \cdot \text{EXP}(-628./\text{temp}) * (\text{temp})^{**(-1.32)}$          | Kohlmann and Poppe (1999) |



Table 1: Gas phase reactions (... continued)

| #      | labels   | reaction                                                                                                                                                                                                           | rate coefficient                                                                                         | reference                 |
|--------|----------|--------------------------------------------------------------------------------------------------------------------------------------------------------------------------------------------------------------------|----------------------------------------------------------------------------------------------------------|---------------------------|
| G3212  | TrGN     | $\text{NH}_2 + \text{HO}_2 \rightarrow \text{ProdH}_2\text{O} + \text{HNO} + \text{H}_2\text{O}$                                                                                                                   | $9.4\text{E-}09 \cdot \text{EXP}(-356./\text{temp}) \cdot (\text{temp})^{**(-1.12)}$                     | Kohlmann and Poppe (1999) |
| G3213  | TrGN     | $\text{NH}_2 + \text{NO} \rightarrow \text{HO}_2 + \text{OH} + \text{N}_2$                                                                                                                                         | $1.92\text{E-}12 \cdot ((\text{temp}/298.)^{**(-1.5)})$                                                  | Kohlmann and Poppe (1999) |
| G3214  | TrGN     | $\text{NH}_2 + \text{NO} \rightarrow \text{ProdH}_2\text{O} + \text{N}_2 + \text{H}_2\text{O}$                                                                                                                     | $1.41\text{E-}11 \cdot ((\text{temp}/298.)^{**(-1.5)})$                                                  | Kohlmann and Poppe (1999) |
| G3215  | TrGN     | $\text{NH}_2 + \text{NO}_2 \rightarrow 1.0 \text{ o3lossno} + \text{ProdH}_2\text{O} + 1.0 \text{ LossO3N} + 1.0 \text{ LossO3} + \text{N}_2\text{O} + \text{H}_2\text{O}$                                         | $1.2\text{E-}11 \cdot ((\text{temp}/298.)^{**(-2.0)})$                                                   | Kohlmann and Poppe (1999) |
| G3216  | TrGN     | $\text{NH}_2 + \text{NO}_2 \rightarrow 1.0 \text{ o3lossno} + 1.0 \text{ LossO3N} + 1.0 \text{ LossO3} + \text{NH}_2\text{O} + \text{NO}$                                                                          | $0.8\text{E-}11 \cdot ((\text{temp}/298.)^{**(-2.0)})$                                                   | Kohlmann and Poppe (1999) |
| G3217  | TrGN     | $\text{NH}_2\text{O} + \text{O}_3 \rightarrow 1.0 \text{ o3lossxo} + 1.0 \text{ LossO3N} + 1.0 \text{ LossO3} + \text{NH}_2 + \text{O}_2$                                                                          | $1.2\text{E-}14$                                                                                         | Kohlmann and Poppe (1999) |
| G3218  | TrGN     | $\text{NH}_2\text{O} \rightarrow \text{NHOH}$                                                                                                                                                                      | $1.3\text{E}3$                                                                                           | Kohlmann and Poppe (1999) |
| G3219  | TrGN     | $\text{HNO} + \text{OH} \rightarrow \text{ProdH}_2\text{O} + \text{NO} + \text{H}_2\text{O}$                                                                                                                       | $8.0\text{E-}11 \cdot \text{EXP}(-500./\text{temp})$                                                     | Kohlmann and Poppe (1999) |
| G3220  | TrGN     | $\text{HNO} + \text{NHOH} \rightarrow \text{NH}_2\text{OH} + \text{NO}$                                                                                                                                            | $1.66\text{E-}12 \cdot \text{EXP}(-1500./\text{temp})$                                                   | Kohlmann and Poppe (1999) |
| G3221  | TrGN     | $\text{HNO} + \text{NO}_2 \rightarrow 1.0 \text{ o3lossno} + 1.0 \text{ LossO3N} + 1.0 \text{ LossO3} + \text{HONO} + \text{NO}$                                                                                   | $1.0\text{E-}12 \cdot \text{EXP}(-1000./\text{temp})$                                                    | Kohlmann and Poppe (1999) |
| G3222  | TrGN     | $\text{NHOH} + \text{OH} \rightarrow \text{ProdH}_2\text{O} + \text{HNO} + \text{H}_2\text{O}$                                                                                                                     | $1.66\text{E-}12$                                                                                        | Kohlmann and Poppe (1999) |
| G3223  | TrGN     | $\text{NH}_2\text{OH} + \text{OH} \rightarrow \text{ProdH}_2\text{O} + \text{NHOH} + \text{H}_2\text{O}$                                                                                                           | $4.13\text{E-}11 \cdot \text{EXP}(-2138./\text{temp})$                                                   | Kohlmann and Poppe (1999) |
| G3224  | TrGN     | $\text{HNO} + \text{O}_2 \rightarrow \text{HO}_2 + \text{NO}$                                                                                                                                                      | $3.65\text{E-}14 \cdot \text{EXP}(-4600./\text{temp})$                                                   | Kohlmann and Poppe (1999) |
| G4100  | UpStG    | $\text{CH}_4 + \text{O}(^1\text{D}) \rightarrow 1.0 \text{ o3lossxo} + 1.0 \text{ LossO3O} + 1.0 \text{ LossO3} + .75 \text{ CH}_3\text{O}_2 + .75 \text{ OH} + .25 \text{ HCHO} + .4 \text{ H} + .05 \text{ H}_2$ | $1.75\text{E-}10$                                                                                        | Sander et al. (2011)      |
| G4101  | StTrG    | $\text{CH}_4 + \text{OH} \rightarrow 1. \text{ LossG4101} + \text{ProdH}_2\text{O} + \text{CH}_3\text{O}_2 + \text{H}_2\text{O}$                                                                                   | $1.85\text{E-}20 \cdot \text{EXP}(2.82 \cdot \text{LOG}(\text{temp}) - 987./\text{temp})$                | Atkinson (2003)           |
| G4102  | TrG      | $\text{CH}_3\text{OH} + \text{OH} \rightarrow 1. \text{ OHlossHO2prodNMHC} + \text{HCHO} + \text{HO}_2$                                                                                                            | $2.9\text{E-}12 \cdot \text{EXP}(-345./\text{temp})$                                                     | Sander et al. (2011)      |
| G4103  | StTrG    | $\text{CH}_3\text{O}_2 + \text{HO}_2 \rightarrow 1. \text{ HO2lossNMHC} + \text{CH}_3\text{OOH} + \text{O}_2$                                                                                                      | $4.1\text{E-}13 \cdot \text{EXP}(750./\text{temp})$                                                      | Sander et al. (2011)*     |
| G4104  | UpStTrGN | $\text{CH}_3\text{O}_2 + \text{NO} \rightarrow 1. \text{ HO2prodNMHCNOy} + \text{ProdMeO2} + \text{ProdMeO2} + 1.0 \text{ ProdO3} + \text{HCHO} + \text{NO}_2 + \text{HO}_2$                                       | $2.8\text{E-}12 \cdot \text{EXP}(300./\text{temp})$                                                      | Sander et al. (2011)      |
| G4105  | TrGN     | $\text{CH}_3\text{O}_2 + \text{NO}_3 \rightarrow 1. \text{ HO2prodNMHCNOy} + 1.0 \text{ o3lossno} + 1.0 \text{ LossO3R} + 1.0 \text{ LossO3} + \text{HCHO} + \text{HO}_2 + \text{NO}_2$                            | $1.3\text{E-}12$                                                                                         | Atkinson et al. (2006)    |
| G4106a | StTrG    | $\text{CH}_3\text{O}_2 + \text{CH}_3\text{O}_2 \rightarrow 2 \text{ HCHO} + 2 \text{ HO}_2$                                                                                                                        | $9.5\text{E-}14 \cdot \text{EXP}(390./\text{temp}) / (1. + 1./26.2 \cdot \text{EXP}(1130./\text{temp}))$ | Sander et al. (2011)      |
| G4106b | StTrG    | $\text{CH}_3\text{O}_2 + \text{CH}_3\text{O}_2 \rightarrow \text{HCHO} + \text{CH}_3\text{OH} + \text{O}_2$                                                                                                        | $9.5\text{E-}14 \cdot \text{EXP}(390./\text{temp}) / (1. + 26.2 \cdot \text{EXP}(-1130./\text{temp}))$   | Sander et al. (2011)      |
| G4107  | StTrG    | $\text{CH}_3\text{OOH} + \text{OH} \rightarrow 0.7 \text{ OHlossNMHC} + \text{ProdH}_2\text{O} + .7 \text{ CH}_3\text{O}_2 + .3 \text{ HCHO} + .3 \text{ OH} + \text{H}_2\text{O}$                                 | $k_{\text{CH300H\_OH}}$                                                                                  | Wallington et al. (2018)  |



Table 1: Gas phase reactions (... continued)

| #      | labels  | reaction                                                                                                                                                                                                                                                          | rate coefficient                                                                                      | reference                 |
|--------|---------|-------------------------------------------------------------------------------------------------------------------------------------------------------------------------------------------------------------------------------------------------------------------|-------------------------------------------------------------------------------------------------------|---------------------------|
| G4108  | StTrG   | $\text{HCHO} + \text{OH} \rightarrow 1. \text{ OHlossHO2prodNMHC} + \text{ProdH2O} + \text{CO} + \text{H}_2\text{O} + \text{HO}_2$                                                                                                                                | $9.52\text{E-}18 * \text{EXP}(2.03 * \text{LOG}(\text{temp}) + 636. / \text{temp})$                   | Sivakumaran et al. (2003) |
| G4109  | TrGN    | $\text{HCHO} + \text{NO}_3 \rightarrow 1. \text{ HO2prodNMHCNOy} + 1.0 \text{ o3lossno} + 1.0 \text{ LossO3R} + 1.0 \text{ LossO3} + \text{HNO}_3 + \text{CO} + \text{HO}_2$                                                                                      | $3.4\text{E-}13 * \text{EXP}(-1900. / \text{temp})$                                                   | Sander et al. (2011)*     |
| G4110  | UpStTrG | $\text{CO} + \text{OH} \rightarrow 1. \text{ LossG4110} + \text{H} + \text{CO}_2$                                                                                                                                                                                 | $(1.57\text{E-}13 + \text{cair} * 3.54\text{E-}33)$                                                   | McCabe et al. (2001)      |
| G4111  | TrG     | $\text{HCOOH} + \text{OH} \rightarrow 1. \text{ OHlossHO2prodNMHC} + \text{ProdH2O} + \text{CO}_2 + \text{HO}_2 + \text{H}_2\text{O}$                                                                                                                             | $4.0\text{E-}13$                                                                                      | Sander et al. (2011)      |
| G4200  | TrGC    | $\text{C}_2\text{H}_6 + \text{OH} \rightarrow 1. \text{ OHlossNMHC} + \text{ProdH2O} + \text{C}_2\text{H}_5\text{O}_2 + \text{H}_2\text{O}$                                                                                                                       | $1.49\text{E-}17 * \text{temp} * \text{temp} * \text{EXP}(-499. / \text{temp})$                       | Atkinson (2003)           |
| G4201  | TrGC    | $\text{C}_2\text{H}_4 + \text{O}_3 \rightarrow 1.0 \text{ o3lossro} + 1.0 \text{ LossO3R} + 1.0 \text{ LossO3} + \text{HCHO} + .63 \text{ CO} + .13 \text{ HO}_2 + 0.23125 \text{ HCOOH} + 0.13875 \text{ HCHO} + 0.13875 \text{ H}_2\text{O}_2 + .13 \text{ OH}$ | $1.2\text{E-}14 * \text{EXP}(-2630. / \text{temp})$                                                   | Sander et al. (2011)*     |
| G4202  | TrGC    | $\text{C}_2\text{H}_4 + \text{OH} \rightarrow 1. \text{ OHlossNMHC} + .6666667 \text{ CH}_3\text{CH}(\text{O}_2)\text{CH}_2\text{OH}$                                                                                                                             | $\text{k\_3rd}(\text{temp}, \text{cair}, 1.0\text{E-}28, 4.5, 7.5\text{E-}12, 0.85, 0.6)$             | Sander et al. (2011)      |
| G4203  | TrGC    | $\text{C}_2\text{H}_5\text{O}_2 + \text{HO}_2 \rightarrow 1. \text{ HO2lossNMHC} + \text{C}_2\text{H}_5\text{OOH}$                                                                                                                                                | $7.5\text{E-}13 * \text{EXP}(700. / \text{temp})$                                                     | Sander et al. (2011)      |
| G4204  | TrGCN   | $\text{C}_2\text{H}_5\text{O}_2 + \text{NO} \rightarrow 1. \text{ HO2prodNMHCNOy} + 1.0 \text{ o3prodro2} + \text{ProdRO2} + 1.0 \text{ ProdO3} + \text{CH}_3\text{CHO} + \text{HO}_2 + \text{NO}_2$                                                              | $2.6\text{E-}12 * \text{EXP}(365. / \text{temp})$                                                     | Sander et al. (2011)      |
| G4205  | TrGCN   | $\text{C}_2\text{H}_5\text{O}_2 + \text{NO}_3 \rightarrow 1. \text{ HO2prodNMHCNOy} + 1.0 \text{ o3lossno} + 1.0 \text{ LossO3R} + 1.0 \text{ LossO3} + \text{CH}_3\text{CHO} + \text{HO}_2 + \text{NO}_2$                                                        | $2.3\text{E-}12$                                                                                      | Wallington et al. (2018)  |
| G4206  | TrGC    | $\text{C}_2\text{H}_5\text{O}_2 + \text{CH}_3\text{O}_2 \rightarrow .75 \text{ HCHO} + \text{HO}_2 + .75 \text{ CH}_3\text{CHO} + .25 \text{ CH}_3\text{OH}$                                                                                                      | $1.6\text{E-}13 * \text{EXP}(195. / \text{temp})$                                                     | see note*                 |
| G4207  | TrGC    | $\text{C}_2\text{H}_5\text{OOH} + \text{OH} \rightarrow 0.3 \text{ OHlossNMHC} + .3 \text{ C}_2\text{H}_5\text{O}_2 + .7 \text{ CH}_3\text{CHO} + .7 \text{ OH}$                                                                                                  | $\text{k\_CH300H\_OH}$                                                                                | see note*                 |
| G4208  | TrGC    | $\text{CH}_3\text{CHO} + \text{OH} \rightarrow 1. \text{ OHlossNMHC} + \text{ProdH2O} + \text{CH}_3\text{C}(\text{O})\text{OO} + \text{H}_2\text{O}$                                                                                                              | $4.4\text{E-}12 * \text{EXP}(365. / \text{temp})$                                                     | Atkinson et al. (2006)    |
| G4209  | TrGCN   | $\text{CH}_3\text{CHO} + \text{NO}_3 \rightarrow 1.0 \text{ o3lossno} + 1.0 \text{ LossO3R} + 1.0 \text{ LossO3} + \text{CH}_3\text{C}(\text{O})\text{OO} + \text{HNO}_3$                                                                                         | $1.4\text{E-}12 * \text{EXP}(-1900. / \text{temp})$                                                   | Sander et al. (2011)      |
| G4210  | TrGC    | $\text{CH}_3\text{COOH} + \text{OH} \rightarrow 1. \text{ OHlossNMHC} + \text{ProdH2O} + \text{CH}_3\text{O}_2 + \text{CO}_2 + \text{H}_2\text{O}$                                                                                                                | $4.2\text{E-}14 * \text{EXP}(855. / \text{temp})$                                                     | Atkinson et al. (2006)    |
| G4211a | TrGC    | $\text{CH}_3\text{C}(\text{O})\text{OO} + \text{HO}_2 \rightarrow 1. \text{ HO2lossNMHC} + \text{CH}_3\text{C}(\text{O})\text{OOH}$                                                                                                                               | $4.3\text{E-}13 * \text{EXP}(1040. / \text{temp}) / (1. + 1. / 37. * \text{EXP}(660. / \text{temp}))$ | Tyndall et al. (2001a)    |
| G4211b | TrGC    | $\text{CH}_3\text{C}(\text{O})\text{OO} + \text{HO}_2 \rightarrow 1. \text{ HO2lossNMHC} + 1.0 \text{ o3prodho2nmhc} + 1.0 \text{ ProdO3} + \text{CH}_3\text{COOH} + \text{O}_3$                                                                                  | $4.3\text{E-}13 * \text{EXP}(1040. / \text{temp}) / (1. + 37. * \text{EXP}(-660. / \text{temp}))$     | Tyndall et al. (2001a)    |
| G4212  | TrGCN   | $\text{CH}_3\text{C}(\text{O})\text{OO} + \text{NO} \rightarrow 1.0 \text{ o3prodro2} + \text{ProdRO2} + 1.0 \text{ ProdO3} + \text{CH}_3\text{O}_2 + \text{CO}_2 + \text{NO}_2$                                                                                  | $8.1\text{E-}12 * \text{EXP}(270. / \text{temp})$                                                     | Tyndall et al. (2001a)    |



Table 1: Gas phase reactions (... continued)

| #      | labels | reaction                                                                                                                                                                                                                                                                                                                                                                                                                      | rate coefficient                                                                          | reference                                               |
|--------|--------|-------------------------------------------------------------------------------------------------------------------------------------------------------------------------------------------------------------------------------------------------------------------------------------------------------------------------------------------------------------------------------------------------------------------------------|-------------------------------------------------------------------------------------------|---------------------------------------------------------|
| G4213  | TrGCN  | $\text{CH}_3\text{C}(\text{O})\text{OO} + \text{NO}_2 \rightarrow \text{panprod} + \text{PAN}$                                                                                                                                                                                                                                                                                                                                | $k_{\text{CH3CO3\_NO2}}$                                                                  | Sander et al. (2011)*                                   |
| G4214  | TrGCN  | $\text{CH}_3\text{C}(\text{O})\text{OO} + \text{NO}_3 \rightarrow 1.0 \text{ o3lossno} + 1.0 \text{ LossO3R} + 1.0 \text{ LossO3} + \text{CH}_3\text{O}_2 + \text{NO}_2 + \text{CO}_2$                                                                                                                                                                                                                                        | 4.E-12                                                                                    | Canosa-Mas et al. (1996)                                |
| G4215a | TrGC   | $\text{CH}_3\text{C}(\text{O})\text{OO} + \text{CH}_3\text{O}_2 \rightarrow \text{HCHO} + \text{HO}_2 + \text{CH}_3\text{O}_2 + \text{CO}_2$                                                                                                                                                                                                                                                                                  | $0.9 \cdot 2.0\text{E-}12 \cdot \text{EXP}(500./\text{temp})$                             | Sander et al. (2011)                                    |
| G4215b | TrGC   | $\text{CH}_3\text{C}(\text{O})\text{OO} + \text{CH}_3\text{O}_2 \rightarrow \text{CH}_3\text{COOH} + \text{HCHO}$                                                                                                                                                                                                                                                                                                             | $0.1 \cdot 2.0\text{E-}12 \cdot \text{EXP}(500./\text{temp})$                             | Sander et al. (2011)                                    |
| G4216  | TrGC   | $\text{CH}_3\text{C}(\text{O})\text{OO} + \text{C}_2\text{H}_5\text{O}_2 \rightarrow .82 \text{ CH}_3\text{O}_2 + \text{CH}_3\text{CHO} + .82 \text{ HO}_2 + .18 \text{ CH}_3\text{COOH}$                                                                                                                                                                                                                                     | $4.9\text{E-}12 \cdot \text{EXP}(211./\text{temp})$                                       | Wallington et al. (2018), Kirchner and Stockwell (1996) |
| G4217  | TrGC   | $\text{CH}_3\text{C}(\text{O})\text{OO} + \text{CH}_3\text{C}(\text{O})\text{OO} \rightarrow 2 \text{ CH}_3\text{O}_2 + 2 \text{ CO}_2 + \text{O}_2$                                                                                                                                                                                                                                                                          | $2.5\text{E-}12 \cdot \text{EXP}(500./\text{temp})$                                       | Tyndall et al. (2001a)                                  |
| G4218  | TrGC   | $\text{CH}_3\text{C}(\text{O})\text{OOH} + \text{OH} \rightarrow 1. \text{ OHlossNMHC} + \text{ProdH}_2\text{O} + \text{CH}_3\text{C}(\text{O})\text{OO} + \text{H}_2\text{O}$                                                                                                                                                                                                                                                | $0.6 \cdot k_{\text{CH300H\_OH}}$                                                         | Rickard and Pascoe (2009)                               |
| G4219  | TrGCN  | $\text{NACA} + \text{OH} \rightarrow 1. \text{ OHlossNMHC} + \text{NO}_2 + \text{HCHO} + \text{CO}$                                                                                                                                                                                                                                                                                                                           | $5.6\text{E-}12 \cdot \text{EXP}(270./\text{temp})$                                       | Pöschl et al. (2000)                                    |
| G4220  | TrGCN  | $\text{PAN} + \text{OH} \rightarrow 1. \text{ OHlossNMHC} + \text{panloss} + \text{ProdH}_2\text{O} + \text{HCHO} + \text{CO} + \text{NO}_2 + \text{H}_2\text{O}$                                                                                                                                                                                                                                                             | $9.50\text{E-}13 \cdot \text{EXP}(-650./\text{temp})$                                     | Rickard and Pascoe (2009)                               |
| G4221  | TrGCN  | $\text{PAN} \rightarrow \text{panloss} + \text{CH}_3\text{C}(\text{O})\text{OO} + \text{NO}_2$                                                                                                                                                                                                                                                                                                                                | $k_{\text{PAN\_M}}$                                                                       | Sander et al. (2011)*                                   |
| G4222  | TrGC   | $\text{C}_2\text{H}_2 + \text{OH} \rightarrow \text{CH}_3\text{O}_2$                                                                                                                                                                                                                                                                                                                                                          | $k_{\text{3rd}}(\text{temp}, \text{cair}, 5.5\text{e-}30, 0.0, 8.3\text{e-}13, -2., 0.6)$ | Sander et al. (2011)                                    |
| G4300  | TrGC   | $\text{C}_3\text{H}_8 + \text{OH} \rightarrow 1. \text{ OHlossNMHC} + \text{ProdH}_2\text{O} + .82 \text{ iC}_3\text{H}_7\text{O}_2 + .18 \text{ C}_2\text{H}_5\text{O}_2 + \text{H}_2\text{O}$                                                                                                                                                                                                                               | $1.65\text{E-}17 \cdot \text{temp} \cdot \text{temp} \cdot \text{EXP}(-87./\text{temp})$  | Atkinson (2003)                                         |
| G4301  | TrGC   | $\text{C}_3\text{H}_6 + \text{O}_3 \rightarrow 1.0 \text{ o3lossro} + 1.0 \text{ LossO3R} + 1.0 \text{ LossO3} + .57 \text{ HCHO} + .47 \text{ CH}_3\text{CHO} + .33 \text{ OH} + .26 \text{ HO}_2 + .07 \text{ CH}_3\text{O}_2 + .06 \text{ C}_2\text{H}_5\text{O}_2 + .23 \text{ CH}_3\text{C}(\text{O})\text{OO} + .04 \text{ MGLYOX} + .06 \text{ CH}_4 + .31 \text{ CO} + .22 \text{ HCOOH} + .03 \text{ CH}_3\text{OH}$ | $6.5\text{E-}15 \cdot \text{EXP}(-1900./\text{temp})$                                     | Sander et al. (2011)                                    |
| G4302  | TrGC   | $\text{C}_3\text{H}_6 + \text{OH} \rightarrow 1. \text{ OHlossNMHC} + \text{CH}_3\text{CH}(\text{O}_2)\text{CH}_2\text{OH}$                                                                                                                                                                                                                                                                                                   | $k_{\text{3rd}}(\text{temp}, \text{cair}, 8.\text{E-}27, 3.5, 3.\text{E-}11, 0., 0.5)$    | Wallington et al. (2018)                                |
| G4303  | TrGCN  | $\text{C}_3\text{H}_6 + \text{NO}_3 \rightarrow 1.0 \text{ o3lossno} + 1.0 \text{ LossO3R} + 1.0 \text{ LossO3} + \text{LC4H9NO3}$                                                                                                                                                                                                                                                                                            | $4.6\text{E-}13 \cdot \text{EXP}(-1155./\text{temp})$                                     | Wallington et al. (2018)                                |
| G4304  | TrGC   | $\text{iC}_3\text{H}_7\text{O}_2 + \text{HO}_2 \rightarrow 1. \text{ HO2lossNMHC} + \text{iC}_3\text{H}_7\text{OOH}$                                                                                                                                                                                                                                                                                                          | $k_{\text{Pr02\_H02}}$                                                                    | Atkinson (1997)                                         |
| G4305  | TrGCN  | $\text{iC}_3\text{H}_7\text{O}_2 + \text{NO} \rightarrow 0.96 \text{ HO2prodNMHCNOy} + 1.0 \text{ o3prodro2} + \text{ProdRO2} + 1.0 \text{ ProdO3} + .96 \text{ CH}_3\text{COCH}_3 + .96 \text{ HO}_2 + .96 \text{ NO}_2 + .04 \text{ iC}_3\text{H}_7\text{ONO}_2$                                                                                                                                                            | $k_{\text{Pr02\_N0}}$                                                                     | Wallington et al. (2018)                                |
| G4306  | TrGC   | $\text{iC}_3\text{H}_7\text{O}_2 + \text{CH}_3\text{O}_2 \rightarrow \text{CH}_3\text{COCH}_3 + .8 \text{ HCHO} + .8 \text{ HO}_2 + .2 \text{ CH}_3\text{OH}$                                                                                                                                                                                                                                                                 | $k_{\text{Pr02\_CH302}}$                                                                  | Kirchner and Stockwell (1996)                           |
| G4307  | TrGC   | $\text{iC}_3\text{H}_7\text{OOH} + \text{OH} \rightarrow 0.3 \text{ OHlossNMHC} + .3 \text{ iC}_3\text{H}_7\text{O}_2 + .7 \text{ CH}_3\text{COCH}_3 + .7 \text{ OH}$                                                                                                                                                                                                                                                         | $k_{\text{CH300H\_OH}}$                                                                   | see note*                                               |



Table 1: Gas phase reactions (... continued)

| #     | labels | reaction                                                                                                                                                                                                                                                                                                                | rate coefficient                                                       | reference                  |
|-------|--------|-------------------------------------------------------------------------------------------------------------------------------------------------------------------------------------------------------------------------------------------------------------------------------------------------------------------------|------------------------------------------------------------------------|----------------------------|
| G4308 | TrGC   | $\text{CH}_3\text{CH}(\text{O}_2)\text{CH}_2\text{OH} + \text{HO}_2 \rightarrow 1. \text{HO}_2\text{lossNMHC} + \text{CH}_3\text{CH}(\text{OOH})\text{CH}_2\text{OH}$                                                                                                                                                   | $6.5\text{E-}13*\text{EXP}(650./\text{temp})$                          | Müller and Brasseur (1995) |
| G4309 | TrGCN  | $\text{CH}_3\text{CH}(\text{O}_2)\text{CH}_2\text{OH} + \text{NO} \rightarrow 0.98 \text{HO}_2\text{prodNMHCNO}_y + 1.0 \text{o3prod}_2 + \text{ProdRO}_2 + 1.0 \text{ProdO}_3 + .98 \text{CH}_3\text{CHO} + .98 \text{HCHO} + .98 \text{HO}_2 + .98 \text{NO}_2 + .02 \text{LC}_4\text{H}_9\text{NO}_3$                | $4.2\text{E-}12*\text{EXP}(180./\text{temp})$                          | Müller and Brasseur (1995) |
| G4310 | TrGC   | $\text{CH}_3\text{CH}(\text{OOH})\text{CH}_2\text{OH} + \text{OH} \rightarrow 0.5 \text{OHlossNMHC} + \text{ProdH}_2\text{O} + .5 \text{CH}_3\text{CH}(\text{O}_2)\text{CH}_2\text{OH} + .5 \text{CH}_3\text{COCH}_2\text{OH} + .5 \text{OH} + \text{H}_2\text{O}$                                                      | $3.8\text{E-}12*\text{EXP}(200./\text{temp})$                          | Müller and Brasseur (1995) |
| G4311 | TrGC   | $\text{CH}_3\text{COCH}_3 + \text{OH} \rightarrow 1. \text{OHlossNMHC} + \text{ProdH}_2\text{O} + \text{CH}_3\text{COCH}_2\text{O}_2 + \text{H}_2\text{O}$                                                                                                                                                              | $1.33\text{E-}13+3.82\text{E-}11*\text{EXP}(-2000./\text{temp})$       | Sander et al. (2011)       |
| G4312 | TrGC   | $\text{CH}_3\text{COCH}_2\text{O}_2 + \text{HO}_2 \rightarrow 1. \text{HO}_2\text{lossNMHC} + \text{CH}_3\text{COCH}_2\text{O}_2\text{H}$                                                                                                                                                                               | $8.6\text{E-}13*\text{EXP}(700./\text{temp})$                          | Tyndall et al. (2001a)     |
| G4313 | TrGCN  | $\text{CH}_3\text{COCH}_2\text{O}_2 + \text{NO} \rightarrow 1.0 \text{o3prod}_2 + \text{ProdRO}_2 + 1.0 \text{ProdO}_3 + \text{CH}_3\text{C}(\text{O})\text{OO} + \text{HCHO} + \text{NO}_2$                                                                                                                            | $2.9\text{E-}12*\text{EXP}(300./\text{temp})$                          | Sander et al. (2011)       |
| G4314 | TrGC   | $\text{CH}_3\text{COCH}_2\text{O}_2 + \text{CH}_3\text{O}_2 \rightarrow .5 \text{MGLYOX} + .5 \text{CH}_3\text{OH} + .3 \text{CH}_3\text{C}(\text{O})\text{OO} + .8 \text{HCHO} + .3 \text{HO}_2 + .2 \text{CH}_3\text{COCH}_2\text{OH}$                                                                                | $7.5\text{E-}13*\text{EXP}(500./\text{temp})$                          | Tyndall et al. (2001a)     |
| G4315 | TrGC   | $\text{CH}_3\text{COCH}_2\text{O}_2\text{H} + \text{OH} \rightarrow 0.3 \text{OHlossNMHC} + .3 \text{CH}_3\text{COCH}_2\text{O}_2 + .7 \text{MGLYOX} + .7 \text{OH}$                                                                                                                                                    | $k_{\text{CH300H\_OH}}$                                                | see note*                  |
| G4316 | TrGC   | $\text{CH}_3\text{COCH}_2\text{OH} + \text{OH} \rightarrow 1. \text{OHlossHO}_2\text{prodNMHC} + \text{MGLYOX} + \text{HO}_2$                                                                                                                                                                                           | $2.15\text{E-}12*\text{EXP}(305./\text{temp})$                         | Dillon et al. (2006)       |
| G4317 | TrGC   | $\text{MGLYOX} + \text{OH} \rightarrow 1. \text{OHlossNMHC} + \text{CH}_3\text{C}(\text{O})\text{OO} + \text{CO}$                                                                                                                                                                                                       | $8.4\text{E-}13*\text{EXP}(830./\text{temp})$                          | Tyndall et al. (1995)      |
| G4320 | TrGCN  | $\text{iC}_3\text{H}_7\text{ONO}_2 + \text{OH} \rightarrow 1. \text{OHlossNMHC} + \text{CH}_3\text{COCH}_3 + \text{NO}_2$                                                                                                                                                                                               | $6.2\text{E-}13*\text{EXP}(-230./\text{temp})$                         | Wallington et al. (2018)   |
| G4400 | TrGC   | $\text{C}_4\text{H}_{10} + \text{OH} \rightarrow 1. \text{OHlossNMHC} + \text{ProdH}_2\text{O} + \text{LC}_4\text{H}_9\text{O}_2 + \text{H}_2\text{O}$                                                                                                                                                                  | $1.81\text{E-}17*\text{temp}*\text{temp}*\text{EXP}(114./\text{temp})$ | Atkinson (2003)            |
| G4401 | TrGC   | $\text{LC}_4\text{H}_9\text{O}_2 + \text{CH}_3\text{O}_2 \rightarrow .88 \text{MEK} + .68 \text{HCHO} + 1.23 \text{HO}_2 + .12 \text{CH}_3\text{CHO} + .12 \text{C}_2\text{H}_5\text{O}_2 + .18 \text{CH}_3\text{OH}$                                                                                                   | $k_{\text{Pr02\_CH302}}$                                               | see note*                  |
| G4402 | TrGC   | $\text{LC}_4\text{H}_9\text{O}_2 + \text{HO}_2 \rightarrow 1. \text{HO}_2\text{lossNMHC} + \text{LC}_4\text{H}_9\text{OOH}$                                                                                                                                                                                             | $k_{\text{Pr02\_H02}}$                                                 | see note*                  |
| G4403 | TrGCN  | $\text{LC}_4\text{H}_9\text{O}_2 + \text{NO} \rightarrow 0.56 \text{HO}_2\text{prodNMHCNO}_y + 1.0 \text{o3prod}_2 + \text{ProdRO}_2 + 1.0 \text{ProdO}_3 + .84 \text{NO}_2 + .56 \text{MEK} + .56 \text{HO}_2 + .28 \text{C}_2\text{H}_5\text{O}_2 + .28 \text{CH}_3\text{CHO} + .16 \text{LC}_4\text{H}_9\text{NO}_3$ | $k_{\text{Pr02\_N0}}$                                                  | see note*                  |



Table 1: Gas phase reactions (... continued)

| #     | labels | reaction                                                                                                                                                                                                                                                                                            | rate coefficient                                                                                       | reference                |
|-------|--------|-----------------------------------------------------------------------------------------------------------------------------------------------------------------------------------------------------------------------------------------------------------------------------------------------------|--------------------------------------------------------------------------------------------------------|--------------------------|
| G4404 | TrGC   | $\text{LC}_4\text{H}_9\text{OOH} + \text{OH} \rightarrow 0.14999998 \text{ OHlossNMHC} + 0.85 \text{ ProdH}_2\text{O} + .15 \text{ LC}_4\text{H}_9\text{O}_2 + .85 \text{ MEK} + .85 \text{ OH} + .85 \text{ H}_2\text{O}$                                                                          | $k_{\text{CH300H\_OH}}$                                                                                | see note*                |
| G4405 | TrGC   | $\text{MVK} + \text{O}_3 \rightarrow 1.0 \text{ o3lossro} + 1.0 \text{ LossO3R} + 1.0 \text{ LossO3} + .45 \text{ HCOOH} + .9 \text{ MGLYOX} + .1 \text{ CH}_3\text{C(O)OO} + .19 \text{ OH} + .22 \text{ CO} + .32 \text{ HO}_2$                                                                   | $.5*(1.36\text{E-}15*\text{EXP}(-2112./\text{temp}) + 7.51\text{E-}16*\text{EXP}(-1521./\text{temp}))$ | Pöschl et al. (2000)     |
| G4406 | TrGC   | $\text{MVK} + \text{OH} \rightarrow 1. \text{ OHlossNMHC} + \text{MVKO2}$                                                                                                                                                                                                                           | $.5*(4.1\text{E-}12*\text{EXP}(452./\text{temp}) + 1.9\text{E-}11*\text{EXP}(175./\text{temp}))$       | Pöschl et al. (2000)     |
| G4407 | TrGC   | $\text{MVKO2} + \text{HO}_2 \rightarrow 1. \text{ HO2lossNMHC} + \text{MVKOOH}$                                                                                                                                                                                                                     | $1.82\text{E-}13*\text{EXP}(1300./\text{temp})$                                                        | Pöschl et al. (2000)     |
| G4408 | TrGCN  | $\text{MVKO2} + \text{NO} \rightarrow 0.75 \text{ HO2prodNMHCNO}_y + 1.0 \text{ o3prodro2} + \text{ProdRO2} + 1.0 \text{ ProdO3} + \text{NO}_2 + .25 \text{ CH}_3\text{C(O)OO} + .25 \text{ CH}_3\text{COCH}_2\text{OH} + .75 \text{ HCHO} + .25 \text{ CO} + .75 \text{ HO}_2 + .5 \text{ MGLYOX}$ | $2.54\text{E-}12*\text{EXP}(360./\text{temp})$                                                         | Pöschl et al. (2000)     |
| G4409 | TrGCN  | $\text{MVKO2} + \text{NO}_2 \rightarrow \text{MPAN}$                                                                                                                                                                                                                                                | $.25*k_{\text{3rd}}(\text{temp}, \text{cair}, 9.7\text{E-}29, 5.6, 9.3\text{E-}12, 1.5, 0.6)$          | Pöschl et al. (2000)     |
| G4410 | TrGC   | $\text{MVKO2} + \text{CH}_3\text{O}_2 \rightarrow .5 \text{ MGLYOX} + .375 \text{ CH}_3\text{COCH}_2\text{OH} + .125 \text{ CH}_3\text{C(O)OO} + 1.125 \text{ HCHO} + .875 \text{ HO}_2 + .125 \text{ CO} + .25 \text{ CH}_3\text{OH}$                                                              | $2\text{E-}12$                                                                                         | von Kuhlmann (2001)      |
| G4411 | TrGC   | $\text{MVKO2} + \text{MVKO2} \rightarrow \text{CH}_3\text{COCH}_2\text{OH} + \text{MGLYOX} + .5 \text{ CO} + .5 \text{ HCHO} + \text{HO}_2$                                                                                                                                                         | $2\text{E-}12$                                                                                         | Pöschl et al. (2000)     |
| G4412 | TrGC   | $\text{MVKOOH} + \text{OH} \rightarrow 1. \text{ OHlossNMHC} + \text{MVKO2}$                                                                                                                                                                                                                        | $3\text{E-}11$                                                                                         | Pöschl et al. (2000)     |
| G4413 | TrGC   | $\text{MEK} + \text{OH} \rightarrow 1. \text{ OHlossNMHC} + \text{LMEKO2}$                                                                                                                                                                                                                          | $1.3\text{E-}12*\text{EXP}(-25./\text{temp})$                                                          | Wallington et al. (2018) |
| G4414 | TrGC   | $\text{LMEKO2} + \text{HO}_2 \rightarrow 1. \text{ HO2lossNMHC} + \text{LMEKOOH}$                                                                                                                                                                                                                   | $k_{\text{PrO2\_HO2}}$                                                                                 | see note*                |
| G4415 | TrGCN  | $\text{LMEKO2} + \text{NO} \rightarrow 1.0 \text{ o3prodro2} + \text{ProdRO2} + 1.0 \text{ ProdO3} + .985 \text{ CH}_3\text{CHO} + .985 \text{ CH}_3\text{C(O)OO} + .985 \text{ NO}_2 + .015 \text{ LC}_4\text{H}_9\text{NO}_3$                                                                     | $k_{\text{PrO2\_NO}}$                                                                                  | see note*                |
| G4416 | TrGC   | $\text{LMEKOOH} + \text{OH} \rightarrow 0.19999999 \text{ OHlossNMHC} + .8 \text{ BIACET} + .8 \text{ OH} + .2 \text{ LMEKO2}$                                                                                                                                                                      | $k_{\text{CH300H\_OH}}$                                                                                | see note*                |
| G4417 | TrGCN  | $\text{LC}_4\text{H}_9\text{NO}_3 + \text{OH} \rightarrow 1. \text{ OHlossNMHC} + \text{ProdH}_2\text{O} + \text{MEK} + \text{NO}_2 + \text{H}_2\text{O}$                                                                                                                                           | $1.7\text{E-}12$                                                                                       | Wallington et al. (2018) |
| G4418 | TrGCN  | $\text{MPAN} + \text{OH} \rightarrow 1. \text{ OHlossNMHC} + \text{CH}_3\text{COCH}_2\text{OH} + \text{NO}_2$                                                                                                                                                                                       | $3.2\text{E-}11$                                                                                       | Orlando et al. (2002)    |
| G4419 | TrGCN  | $\text{MPAN} \rightarrow \text{MVKO2} + \text{NO}_2$                                                                                                                                                                                                                                                | $k_{\text{PAN\_M}}$                                                                                    | see note*                |



Table 1: Gas phase reactions (... continued)

| #      | labels    | reaction                                                                                                                                                                                                                                                                                        | rate coefficient                          | reference                 |
|--------|-----------|-------------------------------------------------------------------------------------------------------------------------------------------------------------------------------------------------------------------------------------------------------------------------------------------------|-------------------------------------------|---------------------------|
| G4500  | TrGC      | $C_5H_8 + O_3 \rightarrow 1.0 \text{ o3lossro} + 1.0 \text{ LossO3R} + 1.0 \text{ LossO3} + .28 \text{ HCOOH} + .65 \text{ MVK} + .1 \text{ MVK}O_2 + .1 \text{ CH}_3C(O)OO + .14 \text{ CO} + .58 \text{ HCHO} + .09 \text{ H}_2O_2 + .08 \text{ CH}_3O_2 + .25 \text{ OH} + .25 \text{ HO}_2$ | $7.86E-15*EXP(-1913./temp)$               | Pöschl et al. (2000)      |
| G4501  | TrGC      | $C_5H_8 + OH \rightarrow 1. \text{ OHlossNMHC} + \text{ISO2}$                                                                                                                                                                                                                                   | $2.54E-11*EXP(410./temp)$                 | Pöschl et al. (2000)      |
| G4502  | TrGCN     | $C_5H_8 + NO_3 \rightarrow 1.0 \text{ o3lossno} + 1.0 \text{ LossO3R} + 1.0 \text{ LossO3} + \text{ISON}$                                                                                                                                                                                       | $3.03E-12*EXP(-446./temp)$                | Pöschl et al. (2000)      |
| G4503  | TrGC      | $ISO2 + HO_2 \rightarrow 1. \text{ HO2lossNMHC} + \text{ISOOH}$                                                                                                                                                                                                                                 | $2.22E-13*EXP(1300./temp)$                | Boyd et al. (2003)        |
| G4504  | TrGCN     | $ISO2 + NO \rightarrow 0.956 \text{ HO2prodNMHCNOy} + 1.0 \text{ o3prodro2} + \text{ProdRO2} + 1.0 \text{ ProdO3} + .956 \text{ NO}_2 + .956 \text{ MVK} + .956 \text{ HCHO} + .956 \text{ HO}_2 + .044 \text{ ISON}$                                                                           | $2.54E-12*EXP(360./temp)$                 | Pöschl et al. (2000)      |
| G4505  | TrGC      | $ISO2 + CH_3O_2 \rightarrow .5 \text{ MVK} + 1.25 \text{ HCHO} + \text{HO}_2 + .25 \text{ MGLYOX} + .25 \text{ CH}_3COCH_2OH + .25 \text{ CH}_3OH$                                                                                                                                              | $2.E-12$                                  | von Kuhlmann (2001)       |
| G4506  | TrGC      | $ISO2 + ISO2 \rightarrow 2 \text{ MVK} + \text{HCHO} + \text{HO}_2$                                                                                                                                                                                                                             | $2.E-12$                                  | Pöschl et al. (2000)      |
| G4507  | TrGC      | $ISOOH + OH \rightarrow \text{MVK} + OH$                                                                                                                                                                                                                                                        | $1.E-10$                                  | Pöschl et al. (2000)      |
| G4508  | TrGCN     | $ISON + OH \rightarrow 1. \text{ OHlossNMHC} + \text{CH}_3COCH_2OH + \text{NACA}$                                                                                                                                                                                                               | $1.3E-11$                                 | Pöschl et al. (2000)      |
| G6100  | UpStTrGCl | $Cl + O_3 \rightarrow ClO + O_2$                                                                                                                                                                                                                                                                | $2.8E-11*EXP(-250./temp)$                 | Atkinson et al. (2007)    |
| G6101  | UpStGCl   | $ClO + O(^3P) \rightarrow 2.0 \text{ o3lossxo} + 2.0 \text{ LossO3Cl} + 2.0 \text{ LossO3} + Cl + O_2$                                                                                                                                                                                          | $2.5E-11*EXP(110./temp)$                  | Atkinson et al. (2007)    |
| G6102a | StTrGCl   | $ClO + ClO \rightarrow 2.0 \text{ o3lossxo} + 2.0 \text{ LossO3Cl} + 2.0 \text{ LossO3} + Cl_2 + O_2$                                                                                                                                                                                           | $1.0E-12*EXP(-1590./temp)$                | Atkinson et al. (2007)    |
| G6102b | StTrGCl   | $ClO + ClO \rightarrow 2.0 \text{ o3lossxo} + 2.0 \text{ LossO3Cl} + 2.0 \text{ LossO3} + 2 \text{ Cl} + O_2$                                                                                                                                                                                   | $3.0E-11*EXP(-2450./temp)$                | Atkinson et al. (2007)    |
| G6102c | StTrGCl   | $ClO + ClO \rightarrow 1.0 \text{ o3lossxo} + 1.0 \text{ LossO3Cl} + 1.0 \text{ LossO3} + Cl + OClO$                                                                                                                                                                                            | $3.5E-13*EXP(-1370./temp)$                | Atkinson et al. (2007)    |
| G6102d | StTrGCl   | $ClO + ClO \rightarrow Cl_2O_2$                                                                                                                                                                                                                                                                 | $k_{ClO\_ClO}$                            | Burkholder et al. (2015)  |
| G6103  | StTrGCl   | $Cl_2O_2 \rightarrow ClO + ClO$                                                                                                                                                                                                                                                                 | $k_{ClO\_ClO}/(2.16E-27*EXP(8537./temp))$ | Burkholder et al. (2015)* |
| G6200  | StGCl     | $Cl + H_2 \rightarrow HCl + H$                                                                                                                                                                                                                                                                  | $3.9E-11*EXP(-2310./temp)$                | Atkinson et al. (2007)    |
| G6201a | StGCl     | $Cl + HO_2 \rightarrow HCl + O_2$                                                                                                                                                                                                                                                               | $4.4E-11-7.5E-11*EXP(-620./temp)$         | Atkinson et al. (2007)    |
| G6201b | StGCl     | $Cl + HO_2 \rightarrow 1.0 \text{ o3prodho2} + 1.0 \text{ ProdO3} + ClO + OH$                                                                                                                                                                                                                   | $7.5E-11*EXP(-620./temp)$                 | Atkinson et al. (2007)    |
| G6202  | StTrGCl   | $Cl + H_2O_2 \rightarrow HCl + HO_2$                                                                                                                                                                                                                                                            | $1.1E-11*EXP(-980./temp)$                 | Atkinson et al. (2007)    |
| G6203  | StGCl     | $ClO + OH \rightarrow 1. \text{ LossG6203} + 1.0 \text{ o3lossoh} + 1.0 \text{ LossO3Cl} + 1.0 \text{ LossO3} + .94 \text{ Cl} + .94 \text{ HO}_2 + .06 \text{ HCl} + .06 \text{ O}_2$                                                                                                          | $7.3E-12*EXP(300./temp)$                  | Atkinson et al. (2007)    |



Table 1: Gas phase reactions (... continued)

| #     | labels     | reaction                                                                                                                                                                                           | rate coefficient                                                                                 | reference                 |
|-------|------------|----------------------------------------------------------------------------------------------------------------------------------------------------------------------------------------------------|--------------------------------------------------------------------------------------------------|---------------------------|
| G6204 | StTrGCl    | $\text{ClO} + \text{HO}_2 \rightarrow 1. \text{ LossG6204} + \text{HOCl} + \text{O}_2$                                                                                                             | $2.2\text{E-}12 \cdot \text{EXP}(340./\text{temp})$                                              | Atkinson et al. (2007)*   |
| G6205 | StTrGCl    | $\text{HCl} + \text{OH} \rightarrow \text{ProdH}_2\text{O} + \text{Cl} + \text{H}_2\text{O}$                                                                                                       | $1.7\text{E-}12 \cdot \text{EXP}(-230./\text{temp})$                                             | Atkinson et al. (2007)    |
| G6206 | StGCl      | $\text{HOCl} + \text{OH} \rightarrow \text{ProdH}_2\text{O} + \text{ClO} + \text{H}_2\text{O}$                                                                                                     | $3.0\text{E-}12 \cdot \text{EXP}(-500./\text{temp})$                                             | Burkholder et al. (2015)  |
| G6300 | UpStTrGCIN | $\text{ClO} + \text{NO} \rightarrow \text{NO}_2 + \text{Cl}$                                                                                                                                       | $6.2\text{E-}12 \cdot \text{EXP}(295./\text{temp})$                                              | Atkinson et al. (2007)    |
| G6301 | StTrGCIN   | $\text{ClO} + \text{NO}_2 \rightarrow \text{ClNO}_3$                                                                                                                                               | $\text{k\_3rd\_iupac}(\text{temp}, \text{cair}, 1.6\text{E-}31, 3.4, 7.\text{E-}11, 0., 0.4)$    | Atkinson et al. (2007)    |
| G6302 | TrGCIN     | $\text{ClNO}_3 \rightarrow \text{ClO} + \text{NO}_2$                                                                                                                                               | $6.918\text{E-}7 \cdot \text{EXP}(-10909./\text{temp}) \cdot \text{cair}$                        | Anderson and Fahey (1990) |
| G6303 | StGCIN     | $\text{ClNO}_3 + \text{O}(^3\text{P}) \rightarrow \text{ClO} + \text{NO}_3$                                                                                                                        | $4.5\text{E-}12 \cdot \text{EXP}(-900./\text{temp})$                                             | Atkinson et al. (2007)    |
| G6304 | StTrGCIN   | $\text{ClNO}_3 + \text{Cl} \rightarrow \text{Cl}_2 + \text{NO}_3$                                                                                                                                  | $6.2\text{E-}12 \cdot \text{EXP}(145./\text{temp})$                                              | Atkinson et al. (2007)    |
| G6400 | StTrGCl    | $\text{Cl} + \text{CH}_4 \rightarrow \text{HCl} + \text{CH}_3\text{O}_2$                                                                                                                           | $6.6\text{E-}12 \cdot \text{EXP}(-1240./\text{temp})$                                            | Atkinson et al. (2006)    |
| G6401 | StTrGCl    | $\text{Cl} + \text{HCHO} \rightarrow \text{HCl} + \text{CO} + \text{HO}_2$                                                                                                                         | $8.1\text{E-}11 \cdot \text{EXP}(-34./\text{temp})$                                              | Atkinson et al. (2006)    |
| G6402 | StTrGCl    | $\text{Cl} + \text{CH}_3\text{OOH} \rightarrow \text{HCHO} + \text{HCl} + \text{OH}$                                                                                                               | $5.9\text{E-}11$                                                                                 | Atkinson et al. (2006)*   |
| G6403 | StTrGCl    | $\text{ClO} + \text{CH}_3\text{O}_2 \rightarrow 1.0 \text{ o3lossro} + 1.0 \text{ LossO3Cl} + 1.0 \text{ LossO3} + \text{HO}_2 + \text{Cl} + \text{HCHO}$                                          | $1.8\text{E-}12 \cdot \text{EXP}(-600./\text{temp})$                                             | Burkholder et al. (2015)  |
| G6404 | StGCl      | $\text{CCl}_4 + \text{O}(^1\text{D}) \rightarrow 4.0 \text{ ProdLCl} + \text{LCARBON} + \text{ClO} + 3 \text{ Cl}$                                                                                 | $3.3\text{E-}10$                                                                                 | Burkholder et al. (2015)  |
| G6405 | StGCl      | $\text{CH}_3\text{Cl} + \text{O}(^1\text{D}) \rightarrow 1.0 \text{ o3lossxo} + 1.0 \text{ ProdLCl} + 1.0 \text{ LossO3Cl} + 1.0 \text{ LossO3} + \text{OH} + \text{Cl}$                           | $1.65\text{E-}10$                                                                                | see note*                 |
| G6406 | StGCl      | $\text{CH}_3\text{Cl} + \text{OH} \rightarrow \text{ProdH}_2\text{O} + 1.0 \text{ ProdLCl} + \text{LCARBON} + \text{H}_2\text{O} + \text{Cl}$                                                      | $1.96\text{E-}12 \cdot \text{EXP}(-1200./\text{temp})$                                           | Burkholder et al. (2015)  |
| G6407 | StGCCl     | $\text{CH}_3\text{CCl}_3 + \text{O}(^1\text{D}) \rightarrow 1.0 \text{ o3lossxo} + 3.0 \text{ ProdLCl} + 1.0 \text{ LossO3Cl} + 1.0 \text{ LossO3} + 2 \text{ LCARBON} + \text{OH} + 3 \text{ Cl}$ | $3.25\text{E-}10$                                                                                | Burkholder et al. (2015)  |
| G6408 | StTrGCCl   | $\text{CH}_3\text{CCl}_3 + \text{OH} \rightarrow \text{ProdH}_2\text{O} + 3.0 \text{ ProdLCl} + 2 \text{ LCARBON} + \text{H}_2\text{O} + 3 \text{ Cl}$                                             | $1.64\text{E-}12 \cdot \text{EXP}(-1520./\text{temp})$                                           | Burkholder et al. (2015)  |
| G6409 | TrGCCl     | $\text{Cl} + \text{C}_2\text{H}_4 \rightarrow .6666667 \text{ CH}_3\text{CH}(\text{O}_2)\text{CH}_2\text{OH} + \text{HCl}$                                                                         | $\text{k\_3rd\_iupac}(\text{temp}, \text{cair}, 1.85\text{E-}29, 3.3, 6.0\text{E-}10, 0.0, 0.4)$ | Atkinson et al. (2006)    |
| G6410 | TrGCCl     | $\text{Cl} + \text{CH}_3\text{CHO} \rightarrow \text{HCl} + \text{CH}_3\text{C}(\text{O})\text{OO}$                                                                                                | $8.0\text{e-}11$                                                                                 | Atkinson et al. (2006)    |
| G6411 | TrGCCl     | $\text{C}_2\text{H}_2 + \text{Cl} \rightarrow \text{LCARBON} + \text{CH}_3 + \text{HCl}$                                                                                                           | $\text{k\_3rd\_iupac}(\text{temp}, \text{cair}, 6.1\text{e-}30, 3.0, 2.0\text{e-}10, 0., 0.6)$   | Atkinson et al. (2006)    |
| G6412 | TrGCCl     | $\text{C}_2\text{H}_6 + \text{Cl} \rightarrow \text{C}_2\text{H}_5\text{O}_2 + \text{HCl}$                                                                                                         | $8.3\text{E-}11 \cdot \text{EXP}(-100./\text{temp})$                                             | Atkinson et al. (2006)    |
| G6500 | StGClF     | $\text{CF}_2\text{Cl}_2 + \text{O}(^1\text{D}) \rightarrow 2.0 \text{ ProdLCl} + \text{LCARBON} + 2 \text{ LFLUORINE} + \text{ClO} + \text{Cl}$                                                    | $1.4\text{E-}10$                                                                                 | Burkholder et al. (2015)  |
| G6501 | StGClF     | $\text{CFCl}_3 + \text{O}(^1\text{D}) \rightarrow 3.0 \text{ ProdLCl} + \text{LCARBON} + 2 \text{ LFLUORINE} + \text{ClO} + 2 \text{ Cl}$                                                          | $2.3\text{E-}10$                                                                                 | Burkholder et al. (2015)  |
| G7100 | StTrGBr    | $\text{Br} + \text{O}_3 \rightarrow \text{BrO} + \text{O}_2$                                                                                                                                       | $1.7\text{E-}11 \cdot \text{EXP}(-800./\text{temp})$                                             | Atkinson et al. (2007)    |



Table 1: Gas phase reactions (... continued)

| #      | labels   | reaction                                                                                                                                                  | rate coefficient                                                                                                                                        | reference                                              |
|--------|----------|-----------------------------------------------------------------------------------------------------------------------------------------------------------|---------------------------------------------------------------------------------------------------------------------------------------------------------|--------------------------------------------------------|
| G7101  | StGBr    | $\text{BrO} + \text{O}(^3\text{P}) \rightarrow 2.0 \text{ o3lossxo} + 2.0 \text{ LossO3Br} + 2.0 \text{ LossO3} + \text{Br} + \text{O}_2$                 | $1.9\text{E-}11 * \text{EXP}(230./\text{temp})$                                                                                                         | Atkinson et al. (2007)                                 |
| G7102a | StTrGBr  | $\text{BrO} + \text{BrO} \rightarrow 2.0 \text{ o3lossxo} + 2.0 \text{ LossO3Br} + 2.0 \text{ LossO3} + 2 \text{ Br} + \text{O}_2$                        | $2.7\text{E-}12$                                                                                                                                        | Atkinson et al. (2007)                                 |
| G7102b | StTrGBr  | $\text{BrO} + \text{BrO} \rightarrow 2.0 \text{ o3lossxo} + 2.0 \text{ LossO3Br} + 2.0 \text{ LossO3} + \text{Br}_2 + \text{O}_2$                         | $2.9\text{E-}14 * \text{EXP}(840./\text{temp})$                                                                                                         | Atkinson et al. (2007)                                 |
| G7200  | StTrGBr  | $\text{Br} + \text{HO}_2 \rightarrow \text{HBr} + \text{O}_2$                                                                                             | $7.7\text{E-}12 * \text{EXP}(-450./\text{temp})$                                                                                                        | Atkinson et al. (2007)                                 |
| G7201  | StTrGBr  | $\text{BrO} + \text{HO}_2 \rightarrow 1. \text{ LossG7201} + \text{HOBr} + \text{O}_2$                                                                    | $4.5\text{E-}12 * \text{EXP}(500./\text{temp})$                                                                                                         | Atkinson et al. (2007)                                 |
| G7202  | StTrGBr  | $\text{HBr} + \text{OH} \rightarrow \text{ProdH2O} + \text{Br} + \text{H}_2\text{O}$                                                                      | $6.7\text{E-}12 * \text{EXP}(155./\text{temp})$                                                                                                         | Atkinson et al. (2007)                                 |
| G7203  | StGBr    | $\text{HOBr} + \text{O}(^3\text{P}) \rightarrow 1.0 \text{ o3lossxo} + 1.0 \text{ LossO3Br} + 1.0 \text{ LossO3} + \text{OH} + \text{BrO}$                | $1.2\text{E-}10 * \text{EXP}(-430./\text{temp})$                                                                                                        | Atkinson et al. (2007)                                 |
| G7204  | StTrGBr  | $\text{Br}_2 + \text{OH} \rightarrow 1.0 \text{ o3prodoh} + 1.0 \text{ ProdO3} + \text{HOBr} + \text{Br}$                                                 | $2.0\text{E-}11 * \text{EXP}(240./\text{temp})$                                                                                                         | Atkinson et al. (2007)                                 |
| G7300  | TrGBrN   | $\text{Br} + \text{BrNO}_3 \rightarrow \text{Br}_2 + \text{NO}_3$                                                                                         | $4.9\text{E-}11$                                                                                                                                        | Orlando and Tyndall (1996)                             |
| G7301  | StTrGBrN | $\text{BrO} + \text{NO} \rightarrow \text{Br} + \text{NO}_2$                                                                                              | $8.7\text{E-}12 * \text{EXP}(260./\text{temp})$                                                                                                         | Atkinson et al. (2007)                                 |
| G7302  | StTrGBrN | $\text{BrO} + \text{NO}_2 \rightarrow \text{BrNO}_3$                                                                                                      | $k_{\text{BrO\_NO2}}$                                                                                                                                   | Atkinson et al. (2007)*                                |
| G7303  | TrGBrN   | $\text{BrNO}_3 \rightarrow \text{BrO} + \text{NO}_2$                                                                                                      | $k_{\text{BrO\_NO2}} / (5.44\text{E-}9 * \text{EXP}(14192./\text{temp}) * 1.\text{E6} * R_{\text{gas}} * \text{temp} / (\text{atm2Pa} * N_{\text{A}}))$ | Orlando and Tyndall (1996),<br>Atkinson et al. (2007)* |
| G7400  | StTrGBr  | $\text{Br} + \text{HCHO} \rightarrow \text{HBr} + \text{CO} + \text{HO}_2$                                                                                | $7.7\text{E-}12 * \text{EXP}(-580./\text{temp})$                                                                                                        | Atkinson et al. (2006)                                 |
| G7401  | TrGBr    | $\text{Br} + \text{CH}_3\text{OOH} \rightarrow \text{CH}_3\text{O}_2 + \text{HBr}$                                                                        | $2.6\text{E-}12 * \text{EXP}(-1600./\text{temp})$                                                                                                       | Kondo and Benson (1984)                                |
| G7402a | TrGBr    | $\text{BrO} + \text{CH}_3\text{O}_2 \rightarrow \text{HOBr} + \text{HCHO}$                                                                                | $f_{\text{BrO\_CH3O2}} * 5.7\text{E-}12$                                                                                                                | Aranda et al. (1997)                                   |
| G7402b | TrGBr    | $\text{BrO} + \text{CH}_3\text{O}_2 \rightarrow 1.0 \text{ o3lossro} + 1.0 \text{ LossO3Br} + 1.0 \text{ LossO3} + \text{Br} + \text{HCHO} + \text{HO}_2$ | $(1 - f_{\text{BrO\_CH3O2}}) * 5.7\text{E-}12$                                                                                                          | Aranda et al. (1997)                                   |
| G7403  | StTrGBr  | $\text{CH}_3\text{Br} + \text{OH} \rightarrow \text{ProdH2O} + 1.0 \text{ ProdLBr} + \text{LCARBON} + \text{H}_2\text{O} + \text{Br}$                     | $1.42\text{E-}12 * \text{EXP}(-1150./\text{temp})$                                                                                                      | Burkholder et al. (2015)                               |
| G7404  | TrGBrC   | $\text{Br} + \text{C}_2\text{H}_4 \rightarrow .6666667 \text{ CH}_3\text{CH}(\text{O}_2)\text{CH}_2\text{OH} + \text{HBr}$                                | $2.8\text{E-}13 * \text{EXP}(224./\text{temp}) / (1. + 1.13\text{E}24 * \text{EXP}(-3200./\text{temp}) / C(\text{ind\_O2}))$                            | Atkinson et al. (2006)                                 |
| G7405  | TrGBrC   | $\text{Br} + \text{CH}_3\text{CHO} \rightarrow \text{HBr} + \text{CH}_3\text{C}(\text{O})\text{OO}$                                                       | $1.8\text{E-}11 * \text{EXP}(-460./\text{temp})$                                                                                                        | Atkinson et al. (2006)                                 |
| G7406  | TrGBrC   | $\text{Br} + \text{C}_2\text{H}_2 \rightarrow \text{LCARBON} + \text{CH}_3\text{O}_2 + \text{HBr}$                                                        | $6.35\text{E-}15 * \text{EXP}(440./\text{temp})$                                                                                                        | Atkinson et al. (2006)                                 |
| G7407  | TrGBr    | $\text{CHBr}_3 + \text{OH} \rightarrow \text{ProdH2O} + 3.0 \text{ ProdSBr} + \text{LCARBON} + \text{H}_2\text{O} + 3 \text{ Br}$                         | $9.0\text{E-}13 * \text{EXP}(-360./\text{temp})$                                                                                                        | Burkholder et al. (2015)*                              |
| G7408  | TrGBr    | $\text{CH}_2\text{Br}_2 + \text{OH} \rightarrow \text{ProdH2O} + 2.0 \text{ ProdSBr} + \text{LCARBON} + \text{H}_2\text{O} + 2 \text{ Br}$                | $2.0\text{E-}12 * \text{EXP}(-840./\text{temp})$                                                                                                        | Burkholder et al. (2015)*                              |
| G7600  | TrGBrCl  | $\text{Br} + \text{BrCl} \rightarrow \text{Br}_2 + \text{Cl}$                                                                                             | $3.32\text{E-}15$                                                                                                                                       | Manion et al. (2015)                                   |



Table 1: Gas phase reactions (... continued)

| #       | labels    | reaction                                                                                                                                                                                                                     | rate coefficient                                  | reference                    |
|---------|-----------|------------------------------------------------------------------------------------------------------------------------------------------------------------------------------------------------------------------------------|---------------------------------------------------|------------------------------|
| G7601   | TrGBrCl   | $\text{Br} + \text{Cl}_2 \rightarrow \text{BrCl} + \text{Cl}$                                                                                                                                                                | 1.10E-15                                          | Dolson and Leone (1987)      |
| G7602   | TrGBrCl   | $\text{Br}_2 + \text{Cl} \rightarrow \text{BrCl} + \text{Br}$                                                                                                                                                                | 2.3E-10*EXP(135./temp)                            | Bedjanian et al. (1998)      |
| G7603a  | StTrGBrCl | $\text{BrO} + \text{ClO} \rightarrow 1.0 \text{ o3lossxo} + 0.5 \text{ LossO3Br} + 0.5 \text{ LossO3Cl}$<br>$+ 1.0 \text{ LossO3} + \text{Br} + \text{OClO}$                                                                 | 1.6E-12*EXP(430./temp)                            | Atkinson et al. (2007)       |
| G7603b  | StTrGBrCl | $\text{BrO} + \text{ClO} \rightarrow 2.0 \text{ o3lossxo} + 1.0 \text{ LossO3Br} + 1.0 \text{ LossO3Cl}$<br>$+ 2.0 \text{ LossO3} + \text{Br} + \text{Cl} + \text{O}_2$                                                      | 2.9E-12*EXP(220./temp)                            | Atkinson et al. (2007)       |
| G7603c  | StTrGBrCl | $\text{BrO} + \text{ClO} \rightarrow 2.0 \text{ o3lossxo} + 1.0 \text{ LossO3Br} + 1.0 \text{ LossO3Cl}$<br>$+ 2.0 \text{ LossO3} + \text{BrCl} + \text{O}_2$                                                                | 5.8E-13*EXP(170./temp)                            | Atkinson et al. (2007)       |
| G7604   | TrGBrCl   | $\text{BrCl} + \text{Cl} \rightarrow \text{Br} + \text{Cl}_2$                                                                                                                                                                | 1.45E-11                                          | Clyne and Cruse (1972)       |
| G7605   | TrGBrCl   | $\text{CHCl}_2\text{Br} + \text{OH} \rightarrow \text{ProdH}_2\text{O} + 1.0 \text{ ProdSBr} + 2.0 \text{ ProdSCl}$<br>$+ \text{LCARBON} + 2 \text{ Cl} + \text{H}_2\text{O} + \text{Br}$                                    | 2.0E-12*EXP(-840./temp)                           | see note*                    |
| G7606   | TrGBrCl   | $\text{CHClBr}_2 + \text{OH} \rightarrow \text{ProdH}_2\text{O} + 2.0 \text{ ProdSBr} + 1.0 \text{ ProdSCl}$<br>$+ \text{LCARBON} + \text{Cl} + \text{H}_2\text{O} + 2 \text{ Br}$                                           | 2.0E-12*EXP(-840./temp)                           | see note*                    |
| G7607   | TrGBrCl   | $\text{CH}_2\text{ClBr} + \text{OH} \rightarrow \text{ProdH}_2\text{O} + 1.0 \text{ ProdSBr} + 1.0 \text{ ProdSCl}$<br>$+ \text{LCARBON} + \text{Cl} + \text{H}_2\text{O} + \text{Br}$                                       | 2.1E-12*EXP(-880./temp)                           | Burkholder et al. (2015)*    |
| G9200a  | StTrGS    | $\text{SO}_2 + \text{OH} \rightarrow 1.0 \text{ o3prodoh} + 1.0 \text{ ProdO3} + \text{SO}_3 + \text{HO}_2$                                                                                                                  | k_3rd(temp, cair, 3.3E-31, 4.3, 1.6E-12, 0., 0.6) | Sander et al. (2011)         |
| G9400a  | TrGCS     | $\text{DMS} + \text{OH} \rightarrow 1. \text{ OHlossNMHC} + 1.0 \text{ o3prodoh} + 1.0 \text{ ProdO3} + \text{CH}_3\text{SO}_2 + \text{HCHO}$                                                                                | 1.13E-11*EXP(-253./temp)                          | Atkinson et al. (2004)*      |
| G9400b  | TrGCS     | $\text{DMS} + \text{OH} \rightarrow 1. \text{ OHlossNMHC} + 1.0 \text{ o3prodoh} + 1.0 \text{ ProdO3} + \text{DMSO} + \text{HO}_2$                                                                                           | k_DMS_OH                                          | Atkinson et al. (2004)*      |
| G9401   | TrGCNS    | $\text{DMS} + \text{NO}_3 \rightarrow \text{CH}_3\text{SO}_2 + \text{HNO}_3 + \text{HCHO}$                                                                                                                                   | 1.9E-13*EXP(520./temp)                            | Atkinson et al. (2004)       |
| G9402   | TrGCS     | $\text{DMSO} + \text{OH} \rightarrow 1. \text{ OHlossNMHC} + 0.40 \text{ o3prodoh} + 0.40 \text{ ProdO3} + .6 \text{ SO}_2 + \text{HCHO} + .6 \text{ CH}_3\text{O}_2 + .4 \text{ HO}_2 + .4 \text{ CH}_3\text{SO}_3\text{H}$ | 1.E-10                                            | Hynes and Wine (1996)        |
| G9403   | TrGS      | $\text{CH}_3\text{SO}_2 \rightarrow \text{SO}_2 + \text{CH}_3\text{O}_2$                                                                                                                                                     | 1.8E13*EXP(-8661./temp)                           | Barone et al. (1995)         |
| G9404   | TrGS      | $\text{CH}_3\text{SO}_2 + \text{O}_3 \rightarrow \text{CH}_3\text{SO}_3$                                                                                                                                                     | 3.E-13                                            | Barone et al. (1995)         |
| G9405   | TrGS      | $\text{CH}_3\text{SO}_3 + \text{HO}_2 \rightarrow \text{CH}_3\text{SO}_3\text{H}$                                                                                                                                            | 5.E-11                                            | Barone et al. (1995)         |
| G9600   | TrGCCIS   | $\text{DMS} + \text{Cl} \rightarrow 1.0 \text{ o3produntagged} + 1.0 \text{ ProdO3} + \text{CH}_3\text{SO}_2$<br>$+ \text{HCl} + \text{HCHO}$                                                                                | 3.3E-10                                           | Atkinson et al. (2004)       |
| G9700   | TrGBrCS   | $\text{DMS} + \text{Br} \rightarrow 1.0 \text{ o3produntagged} + 1.0 \text{ ProdO3} + \text{CH}_3\text{SO}_2$<br>$+ \text{HBr} + \text{HCHO}$                                                                                | 9.E-11*EXP(-2386./temp)                           | Jefferson et al. (1994)      |
| G9701   | TrGBrCS   | $\text{DMS} + \text{BrO} \rightarrow \text{DMSO} + \text{Br}$                                                                                                                                                                | 4.4E-13                                           | Ingham et al. (1999)         |
| G01Diag | StTrG     | $\text{O}_3(\text{s}) \rightarrow \text{LO}_3(\text{s})$                                                                                                                                                                     | k_03s                                             | Roelofs and Lelieveld (1997) |



Table 1: Gas phase reactions (... continued)

| #         | labels  | reaction                                                                                                                                                                                                                                                                                                              | rate coefficient                                                                                               | reference                                                           |
|-----------|---------|-----------------------------------------------------------------------------------------------------------------------------------------------------------------------------------------------------------------------------------------------------------------------------------------------------------------------|----------------------------------------------------------------------------------------------------------------|---------------------------------------------------------------------|
| G42085abS | TrGCN   | $\text{CH}_3\text{CN} + \text{OH} \rightarrow \text{OH}$                                                                                                                                                                                                                                                              | $8.1\text{E-}13 \cdot \text{EXP}(-1080./\text{temp})$                                                          | Atkinson et al. (2006), Tyndall et al. (2001b)                      |
| G42086bcS | TrGCN   | $\text{CH}_3\text{CN} + \text{O}(^1\text{D}) \rightarrow \text{O}(^1\text{D})$                                                                                                                                                                                                                                        | $2.54\text{E-}10 \cdot \text{EXP}(-24./\text{temp})$<br>$\cdot (1.-0.0269 \cdot \text{EXP}(137./\text{temp}))$ | Strekowski et al. (2010)                                            |
| G6416S    | TrGCCIN | $\text{Cl} + \text{CH}_3\text{CN} \rightarrow \text{Cl}$                                                                                                                                                                                                                                                              | $1.6\text{E-}11 \cdot \text{EXP}(-2104./\text{temp})$                                                          | Tyndall et al. (1996), Tyndall et al. (2001b), Sander et al. (2019) |
| G6500dc01 | StGClF  | $\text{CHF}_2\text{Cl} + \text{O}(^1\text{D}) \rightarrow 0.19 \text{ o3lossxo} + 0.75 \text{ ProdLCl} + 0.19 \text{ LossO3O} + 0.19 \text{ LossO3} + 0.56 \text{ ClO} + 0.05 \text{ OH} + 0.25 \text{ O}(^3\text{P}) + 0.25 \text{ CHF}_2\text{Cl} + 0.75 \text{ LCARBON} + 0.19 \text{ Cl} + 1.5 \text{ LFLUORINE}$ | $1.02\text{E-}10$                                                                                              | Burkholder et al. (2019)                                            |
| G6500dc02 | StG     | $\text{CHF}_2\text{Cl} + \text{OH} \rightarrow \text{ProdH}_2\text{O} + 1.0 \text{ ProdLCl} + \text{LCARBON} + \text{H}_2\text{O} + 2 \text{ LFLUORINE} + \text{Cl}$                                                                                                                                                  | $9.2\text{e-}13 \cdot \text{EXP}(-1560./\text{temp})$                                                          | Burkholder et al. (2019)                                            |
| G6500dc03 | StG     | $\text{CHF}_2\text{Cl} + \text{Cl} \rightarrow 1.0 \text{ ProdLCl} + \text{HCl} + \text{LCARBON} + 2 \text{ LFLUORINE} + \text{Cl}$                                                                                                                                                                                   | $5.9\text{e-}12 \cdot \text{EXP}(-2430./\text{temp})$                                                          | Burkholder et al. (2019)                                            |
| G5300dc01 | StGCF   | $\text{CH}_2\text{FCF}_3 + \text{O}(^1\text{D}) \rightarrow 0.35 \text{ o3lossxo} + 0.35 \text{ LossO3O} + 0.35 \text{ LossO3} + 0.65 \text{ O}(^3\text{P}) + 0.65 \text{ CH}_2\text{FCF}_3 + 0.24 \text{ OH} + 0.70 \text{ LCARBON} + 1.4 \text{ LFLUORINE}$                                                         | $4.9\text{E-}11$                                                                                               | Burkholder et al. (2019)*                                           |
| G5300dc02 | StG     | $\text{CH}_2\text{FCF}_3 + \text{OH} \rightarrow \text{ProdH}_2\text{O} + 2 \text{ LCARBON} + \text{H}_2\text{O} + 4 \text{ LFLUORINE}$                                                                                                                                                                               | $1.03\text{e-}12 \cdot \text{EXP}(-1620./\text{temp})$                                                         | Burkholder et al. (2019)                                            |
| G5300dc03 | StG     | $\text{CH}_2\text{FCF}_3 + \text{Cl} \rightarrow \text{HCl} + 2 \text{ LCARBON} + 4 \text{ LFLUORINE}$                                                                                                                                                                                                                | $2.1\text{e-}12 \cdot \text{EXP}(-2160./\text{temp})$                                                          | Burkholder et al. (2019)                                            |
| G6500dc04 | StG     | $\text{CF}_2\text{ClCFCl}_2 + \text{O}(^1\text{D}) \rightarrow 0.10 \text{ o3lossxo} + 2.7 \text{ ProdLCl} + 0.10 \text{ LossO3O} + 0.10 \text{ LossO3} + 0.1 \text{ O}(^3\text{P}) + 0.1 \text{ CF}_2\text{ClCFCl}_2 + 0.8 \text{ ClO} + 1.8 \text{ LCARBON} + 1.9 \text{ Cl} + 2.7 \text{ LFLUORINE}$               | $2.32\text{e-}10$                                                                                              | Burkholder et al. (2019)                                            |
| G6400dc01 | StG     | $\text{CH}_2\text{Cl}_2 + \text{OH} \rightarrow \text{ProdH}_2\text{O} + 2.0 \text{ ProdSCl} + \text{LCARBON} + \text{H}_2\text{O} + 2 \text{ Cl}$                                                                                                                                                                    | $1.92\text{e-}12 \cdot \text{EXP}(-880./\text{temp})$                                                          | Burkholder et al. (2019)                                            |
| G6400dc02 | StG     | $\text{CH}_2\text{Cl}_2 + \text{Cl} \rightarrow 2.0 \text{ ProdSCl} + \text{LCARBON} + \text{HCl} + 2 \text{ Cl}$                                                                                                                                                                                                     | $7.4\text{e-}12 \cdot \text{EXP}(-910./\text{temp})$                                                           | Burkholder et al. (2019)                                            |
| G5300dc04 | StG     | $\text{CHF}_3 + \text{O}(^1\text{D}) \rightarrow 0.25 \text{ o3lossxo} + 0.25 \text{ LossO3O} + 0.25 \text{ LossO3} + 0.75 \text{ O}(^3\text{P}) + 0.75 \text{ CHF}_3 + 0.25 \text{ LCARBON} + 0.75 \text{ LFLUORINE}$                                                                                                | $8.7\text{e-}12 \cdot \text{EXP}(30./\text{temp})$                                                             | Burkholder et al. (2019)*                                           |
| G5300dc05 | StG     | $\text{CHF}_3 + \text{OH} \rightarrow \text{ProdH}_2\text{O} + \text{LCARBON} + \text{H}_2\text{O} + 3 \text{ LFLUORINE}$                                                                                                                                                                                             | $6.1\text{e-}13 \cdot \text{EXP}(-2260./\text{temp})$                                                          | Burkholder et al. (2019)                                            |



Table 1: Gas phase reactions (... continued)

| #         | labels | reaction                                                                                                                                                                                                                                                                                                 | rate coefficient                                       | reference                 |
|-----------|--------|----------------------------------------------------------------------------------------------------------------------------------------------------------------------------------------------------------------------------------------------------------------------------------------------------------|--------------------------------------------------------|---------------------------|
| G6500dc05 | StG    | $\text{CH}_3\text{CFCl}_2 + \text{O}(^1\text{D}) \rightarrow 0.69 \text{ o3lossxo} + 1.38 \text{ ProdLCl} + 0.69 \text{ LossO3O} + 0.69 \text{ LossO3} + 0.31 \text{ O}(^3\text{P}) + 0.31 \text{ CH}_3\text{CFCl}_2 + 1.38 \text{ L CARBON} + 1.38 \text{ Cl} + 1 \text{ LFLUORINE}$                    | 2.6E-10                                                | Burkholder et al. (2019)* |
| G6500dc06 | StG    | $\text{CH}_3\text{CFCl}_2 + \text{OH} \rightarrow \text{ProdH}_2\text{O} + 2.0 \text{ ProdLCl} + \text{H}_2\text{O} + 2 \text{ L CARBON} + 1 \text{ LFLUORINE} + 2 \text{ Cl}$                                                                                                                           | $1.25\text{e-}12 \cdot \text{EXP}(-1600./\text{temp})$ | Burkholder et al. (2019)  |
| G6500dc07 | StG    | $\text{CH}_3\text{CFCl}_2 + \text{Cl} \rightarrow 2.0 \text{ ProdLCl} + \text{HCl} + 2 \text{ L CARBON} + 1 \text{ LFLUORINE} + 2 \text{ Cl}$                                                                                                                                                            | $3.5\text{e-}12 \cdot \text{EXP}(-2200./\text{temp})$  | Burkholder et al. (2019)  |
| G6500dc08 | StG    | $\text{CF}_2\text{ClCF}_2\text{Cl} + \text{O}(^1\text{D}) \rightarrow 0.90 \text{ o3lossxo} + 1.8 \text{ ProdLCl} + 0.90 \text{ LossO3O} + 0.90 \text{ LossO3} + 0.10 \text{ O}(^3\text{P}) + 0.10 \text{ CF}_2\text{ClCF}_2\text{Cl} + 1.80 \text{ L CARBON} + 1.80 \text{ Cl} + 3.6 \text{ LFLUORINE}$ | $1.3\text{E-}10 \cdot \text{EXP}(25./\text{temp})$     | Burkholder et al. (2019)  |
| G5300dc06 | StG    | $\text{CHF}_2\text{CF}_3 + \text{O}(^1\text{D}) \rightarrow 0.75 \text{ o3lossxo} + 0.75 \text{ LossO3O} + 0.75 \text{ LossO3} + 0.25 \text{ O}(^3\text{P}) + 0.25 \text{ CHF}_2\text{CF}_3 + 0.6 \text{ OH} + 1.50 \text{ L CARBON} + 3.5 \text{ LFLUORINE}$                                            | $9.5\text{E-}12 \cdot \text{EXP}(25./\text{temp})$     | Burkholder et al. (2019)* |
| G5300dc07 | StG    | $\text{CHF}_2\text{CF}_3 + \text{OH} \rightarrow \text{ProdH}_2\text{O} + \text{H}_2\text{O} + 2 \text{ L CARBON} + 5 \text{ LFLUORINE}$                                                                                                                                                                 | $5.16\text{e-}13 \cdot \text{EXP}(-1670./\text{temp})$ | Burkholder et al. (2019)  |
| G6500dc09 | StG    | $\text{CHF}_2\text{CF}_3 + \text{Cl} \rightarrow \text{HCl} + 2 \text{ L CARBON} + 5 \text{ LFLUORINE}$                                                                                                                                                                                                  | $1.85\text{e-}12 \cdot \text{EXP}(-2600./\text{temp})$ | Burkholder et al. (2019)  |
| G5300dc08 | StG    | $\text{CH}_3\text{CF}_3 + \text{O}(^1\text{D}) \rightarrow 0.65 \text{ o3lossxo} + 0.65 \text{ LossO3O} + 0.65 \text{ LossO3} + 0.35 \text{ O}(^3\text{P}) + 0.35 \text{ CH}_3\text{CF}_3 + 0.38 \text{ OH} + 1.3 \text{ L CARBON} + 1.95 \text{ LFLUORINE}$                                             | $5.6\text{e-}11 \cdot \text{EXP}(20./\text{temp})$     | Burkholder et al. (2019)* |
| G5300dc09 | StG    | $\text{CH}_3\text{CF}_3 + \text{OH} \rightarrow \text{ProdH}_2\text{O} + \text{H}_2\text{O} + 2 \text{ L CARBON} + 3 \text{ LFLUORINE}$                                                                                                                                                                  | $1.07\text{e-}12 \cdot \text{EXP}(-2000./\text{temp})$ | Burkholder et al. (2019)  |
| G6500dc10 | StG    | $\text{CH}_3\text{CF}_3 + \text{Cl} \rightarrow \text{HCl} + 2 \text{ L CARBON} + 3 \text{ LFLUORINE}$                                                                                                                                                                                                   | $1.64\text{e-}11 \cdot \text{EXP}(-3900./\text{temp})$ | Burkholder et al. (2019)  |
| G6400dc03 | StG    | $\text{CHCl}_3 + \text{OH} \rightarrow \text{ProdH}_2\text{O} + 3.0 \text{ ProdSCl} + \text{H}_2\text{O} + \text{L CARBON} + 3 \text{ Cl}$                                                                                                                                                               | $2.2\text{e-}12 \cdot \text{EXP}(-920./\text{temp})$   | Burkholder et al. (2019)  |
| G6400dc04 | StG    | $\text{CHCl}_3 + \text{Cl} \rightarrow 3.0 \text{ ProdSCl} + \text{HCl} + \text{L CARBON} + 3 \text{ Cl}$                                                                                                                                                                                                | $3.3\text{e-}12 \cdot \text{EXP}(-990./\text{temp})$   | Burkholder et al. (2019)  |
| G6500dc11 | StG    | $\text{CF}_3\text{CF}_2\text{Cl} + \text{O}(^1\text{D}) \rightarrow 0.86 \text{ o3lossxo} + 0.86 \text{ ProdLCl} + 0.86 \text{ LossO3O} + 0.86 \text{ LossO3} + 0.14 \text{ O}(^3\text{P}) + 0.14 \text{ CF}_3\text{CF}_2\text{Cl} + 1.72 \text{ L CARBON} + 4.3 \text{ LFLUORINE} + 0.86 \text{ Cl}$    | $5.4\text{e-}11 \cdot \text{EXP}(30./\text{temp})$     | Burkholder et al. (2019)  |
| G5300dc10 | StG    | $\text{CH}_2\text{F}_2 + \text{O}(^1\text{D}) \rightarrow 0.30 \text{ o3lossxo} + 0.30 \text{ LossO3O} + 0.30 \text{ LossO3} + 0.7 \text{ O}(^3\text{P}) + 0.7 \text{ CH}_2\text{F}_2 + 0.3 \text{ L CARBON} + 0.6 \text{ LFLUORINE}$                                                                    | 5.1e-11                                                | Burkholder et al. (2019)  |
| G5300dc11 | StG    | $\text{CH}_2\text{F}_2 + \text{OH} \rightarrow \text{ProdH}_2\text{O} + \text{H}_2\text{O} + \text{L CARBON} + 2 \text{ LFLUORINE}$                                                                                                                                                                      | $1.7\text{e-}12 \cdot \text{EXP}(-1500./\text{temp})$  | Burkholder et al. (2019)  |



Table 1: Gas phase reactions (... continued)

| #         | labels | reaction                                                                                                                                                                                                                                                                                              | rate coefficient                   | reference                |
|-----------|--------|-------------------------------------------------------------------------------------------------------------------------------------------------------------------------------------------------------------------------------------------------------------------------------------------------------|------------------------------------|--------------------------|
| G5300dc12 | StG    | $\text{CH}_3\text{CHF}_2 + \text{O}(^1\text{D}) \rightarrow 0.55 \text{ o3lossxo} + 0.55 \text{ LossO3O} + 0.55 \text{ LossO3} + 0.45 \text{ O}(^3\text{P}) + 0.45 \text{ CH}_3\text{CHF}_2 + 0.15 \text{ OH} + 1.1 \text{ L CARBON} + 1.1 \text{ L FLUORINE}$                                        | 1.75e-10                           | Burkholder et al. (2019) |
| G5300dc13 | StG    | $\text{CH}_3\text{CHF}_2 + \text{OH} \rightarrow 2 \text{ L CARBON} + 2 \text{ L FLUORINE}$                                                                                                                                                                                                           | 8.7e-13*EXP(-975./temp)            | Burkholder et al. (2019) |
| G6500dc12 | StG    | $\text{CH}_3\text{CHF}_2 + \text{Cl} \rightarrow \text{HCl} + 2 \text{ L CARBON} + 2 \text{ L FLUORINE}$                                                                                                                                                                                              | 6.5e-12*EXP(-970./temp)            | Burkholder et al. (2019) |
| G6500pg01 | StG    | $\text{CH}_3\text{CF}_2\text{Cl} + \text{O}(^1\text{D}) \rightarrow 0.65 \text{ o3lossxo} + 0.65 \text{ ProdLCl} + 0.65 \text{ LossO3O} + 0.65 \text{ LossO3} + 0.35 \text{ O}(^3\text{P}) + 0.35 \text{ CH}_3\text{CF}_2\text{Cl} + 1.3 \text{ L CARBON} + 0.65 \text{ Cl} + 1.3 \text{ L FLUORINE}$ | 2.0e-10                            | Burkholder et al. (2019) |
| G6500pg02 | StG    | $\text{CH}_3\text{CF}_2\text{Cl} + \text{OH} \rightarrow \text{ProdH}_2\text{O} + 1.0 \text{ ProdLCl} + \text{H}_2\text{O} + 2 \text{ L CARBON} + 2 \text{ L FLUORINE} + \text{Cl}$                                                                                                                   | 1.3e-12*EXP(-1770./temp)           | Burkholder et al. (2019) |
| G6500pg03 | StG    | $\text{CH}_3\text{CF}_2\text{Cl} + \text{Cl} \rightarrow 1.0 \text{ ProdLCl} + \text{HCl} + 2 \text{ L CARBON} + 2 \text{ L FLUORINE} + \text{Cl}$                                                                                                                                                    | 1.35e-12*EXP(2400./temp)           | Burkholder et al. (2019) |
| G7600pg01 | StG    | $\text{CBrF}_2\text{CBrF}_2 + \text{O}(^1\text{D}) \rightarrow 0.75 \text{ o3lossxo} + 1.5 \text{ ProdLBr} + 0.75 \text{ LossO3O} + 0.75 \text{ LossO3} + 0.25 \text{ O}(^3\text{P}) + 0.25 \text{ CBrF}_2\text{CBrF}_2 + 1.5 \text{ L CARBON} + 1.5 \text{ Br} + 3.0 \text{ L FLUORINE}$             | 1.6e-10                            | Burkholder et al. (2019) |
| G9100     | TrStGS | $\text{SO} + \text{O}_2 \rightarrow 2.0 \text{ o3produntagged} + 2.0 \text{ ProdO3} + \text{SO}_2 + \text{O}(^3\text{P})$                                                                                                                                                                             | 1.25e-13*exp(-2190/temp)           | Sander et al. (2011)     |
| G9101     | TrStGS | $\text{SO} + \text{O}_3 \rightarrow \text{SO}_2 + \text{O}_2$                                                                                                                                                                                                                                         | 3.4e-12*exp(-1100/temp)            | Sander et al. (2011)     |
| G9102     | TrStGS | $\text{S} + \text{O}_2 \rightarrow 1.0 \text{ o3produntagged} + 1.0 \text{ ProdO3} + \text{SO} + \text{O}(^3\text{P})$                                                                                                                                                                                | 2.3e-12                            | Sander et al. (2011)     |
| G9201     | TrStGS | $\text{SH} + \text{O}_2 \rightarrow \text{OH} + \text{SO}$                                                                                                                                                                                                                                            | 4.e-19                             | Sander et al. (2011)     |
| G9202     | TrStGS | $\text{SO}_3 + \text{H}_2\text{O} \rightarrow \text{LossH}_2\text{O} + \text{H}_2\text{SO}_4$                                                                                                                                                                                                         | 8.5e-41*exp(6540./temp)*C(ind_H2O) | Sander et al. (2003)     |
| G9406     | TrStGS | $\text{OCS} + \text{OH} \rightarrow \text{SH} + \text{CO}_2$                                                                                                                                                                                                                                          | 1.1e-13*exp(-1200./temp)           | Sander et al. (2011)     |
| G9407     | TrStGS | $\text{OCS} + \text{O}(^3\text{P}) \rightarrow 1.0 \text{ o3lossxo} + 1.0 \text{ LossO3Su} + 1.0 \text{ LossO3} + \text{CO} + \text{SO}$                                                                                                                                                              | 2.1e-11*exp(-2200./temp)           | Sander et al. (2011)     |



## General notes

### Three-body reactions

Rate coefficients for three-body reactions are defined via the function `k_3rd`( $T, M, k_0^{300}, n, k_{\text{inf}}^{300}, m, f_c$ ). In the code, the temperature  $T$  is called `temp` and the concentration of “air molecules”  $M$  is called `cair`. Using the auxiliary variables  $k_0(T)$ ,  $k_{\text{inf}}(T)$ , and  $k_{\text{ratio}}$ , `k_3rd` is defined as:

$$k_0(T) = k_0^{300} \times \left(\frac{300\text{K}}{T}\right)^n \quad (1)$$

$$k_{\text{inf}}(T) = k_{\text{inf}}^{300} \times \left(\frac{300\text{K}}{T}\right)^m \quad (2)$$

$$k_{\text{ratio}} = \frac{k_0(T)M}{k_{\text{inf}}(T)} \quad (3)$$

$$\text{k\_3rd} = \frac{k_0(T)M}{1 + k_{\text{ratio}}} \times f_c^{\left(\frac{1}{1 + (\log_{10}(k_{\text{ratio}}))^2}\right)} \quad (4)$$

A similar function, called `k_3rd_iupac` here, is used by Wallington et al. (2018) for three-body reactions. It has the same function parameters as `k_3rd` and it is defined as:

$$k_0(T) = k_0^{300} \times \left(\frac{300\text{K}}{T}\right)^n \quad (5)$$

$$k_{\text{inf}}(T) = k_{\text{inf}}^{300} \times \left(\frac{300\text{K}}{T}\right)^m \quad (6)$$

$$k_{\text{ratio}} = \frac{k_0(T)M}{k_{\text{inf}}(T)} \quad (7)$$

$$N = 0.75 - 1.27 \times \log_{10}(f_c) \quad (8)$$

$$\text{k\_3rd\_iupac} = \frac{k_0(T)M}{1 + k_{\text{ratio}}} \times f_c^{\left(\frac{1}{1 + (\log_{10}(k_{\text{ratio}})/N)^2}\right)} \quad (9)$$

## Structure-Activity Relationships (SAR)

Some unmeasured rate coefficients are estimated with structure-activity relationships, using the following parameters and substituent factors:

| $k$ for H-abstraction by OH in $\text{cm}^{-3}\text{s}^{-1}$ |                                                                     |
|--------------------------------------------------------------|---------------------------------------------------------------------|
| <code>k_p</code>                                             | $4.49 \times 10^{-18} \times (T/\text{K})^2 \exp(-320 \text{ K}/T)$ |
| <code>k_s</code>                                             | $4.50 \times 10^{-18} \times (T/\text{K})^2 \exp(253 \text{ K}/T)$  |
| <code>k_t</code>                                             | $2.12 \times 10^{-18} \times (T/\text{K})^2 \exp(696 \text{ K}/T)$  |
| <code>k_ROHRO</code>                                         | $2.1 \times 10^{-18} \times (T/\text{K})^2 \exp(-85 \text{ K}/T)$   |
| <code>k_CO2H</code>                                          | $0.7 \times k_{\text{CH}_3\text{CO}_2\text{H}+\text{OH}}$           |
| <code>k_ROOHRO</code>                                        | $0.6 \times k_{\text{CH}_3\text{OOH}+\text{OH}}$                    |
| <code>f_alk</code>                                           | 1.23                                                                |
| <code>f_sOH</code>                                           | 3.44                                                                |
| <code>f_tOH</code>                                           | 2.68                                                                |
| <code>f_sOOH</code>                                          | 8.                                                                  |
| <code>f_tOOH</code>                                          | 8.                                                                  |
| <code>f_ONO2</code>                                          | 0.04                                                                |
| <code>f_CH2ON02</code>                                       | 0.20                                                                |
| <code>f_cpan</code>                                          | 0.25                                                                |
| <code>f_allyl</code>                                         | 3.6                                                                 |
| <code>f_CHO</code>                                           | 0.55                                                                |
| <code>f_CO2H</code>                                          | 1.67                                                                |
| <code>f_CO</code>                                            | 0.73                                                                |
| <code>f_O</code>                                             | 8.15                                                                |
| <code>f_pCH2OH</code>                                        | 1.29                                                                |
| <code>f_tCH2OH</code>                                        | 0.53                                                                |

| $k$ for OH-addition to double bonds in $\text{cm}^{-3}\text{s}^{-1}$ |                                                                                                                    |
|----------------------------------------------------------------------|--------------------------------------------------------------------------------------------------------------------|
| <code>k_adp</code>                                                   | $4.5 \times 10^{-12} \times (T/300 \text{ K})^{-0.85}$                                                             |
| <code>k_ads</code>                                                   | $1/4 \times (1.1 \times 10^{-11} \times \exp(485 \text{ K}/T) + 1.0 \times 10^{-11} \times \exp(553 \text{ K}/T))$ |
| <code>k_adt</code>                                                   | $1.922 \times 10^{-11} \times \exp(450 \text{ K}/T) - k_{\text{ads}}$                                              |
| <code>k_adsecprim</code>                                             | $3.0 \times 10^{-11}$                                                                                              |
| <code>k_adtertprim</code>                                            | $5.7 \times 10^{-11}$                                                                                              |
| <code>a_PAN</code>                                                   | 0.56                                                                                                               |
| <code>a_CHO</code>                                                   | 0.31                                                                                                               |
| <code>a_COCH3</code>                                                 | 0.76                                                                                                               |
| <code>a_CH2OH</code>                                                 | 1.7                                                                                                                |
| <code>a_CH2OOH</code>                                                | 1.7                                                                                                                |
| <code>a_COH</code>                                                   | 2.2                                                                                                                |
| <code>a_COOH</code>                                                  | 2.2                                                                                                                |
| <code>a_CO2H</code>                                                  | 0.25                                                                                                               |
| <code>a_CH2ON02</code>                                               | 0.64                                                                                                               |

## RO<sub>2</sub> self and cross reactions

The self and cross reactions of organic peroxy radicals are treated according to the permutation reaction formalism as implemented in the MCM (Rickard and Pascoe, 2009), as described by Jenkin et al. (1997). Every organic peroxy radical reacts in a pseudo-first-order reaction with a rate constant that is expressed as  $k^{\text{1st}} = 2 \times \sqrt{k_{\text{self}} \times \text{k\_CH302}} \times [\text{RO}_2]$  where  $k_{\text{self}}$  = second-order rate coefficient of the self reaction of the organic peroxy radical,  $\text{k\_CH302}$  = second-order rate coefficient of the self reaction of  $\text{CH}_3\text{O}_2$ , and  $[\text{RO}_2]$  = sum of the concentrations of all organic peroxy radicals.



## Specific notes

G1002a: The path leading to  $2\text{O}(^3\text{P}) + \text{O}_2$  results in a null cycle regarding odd oxygen and is neglected.

G2110: The rate coefficient is:  $k_{\text{H02\_H02}} = (3.0\text{E-}13 * \text{EXP}(460./\text{temp}) + 2.1\text{E-}33 * \text{EXP}(920./\text{temp}) * \text{cair}) * (1. + 1.4\text{E-}21 * \text{EXP}(2200./\text{temp}) * \text{C}(\text{ind\_H20}))$ .

G3109: The rate coefficient is:  $k_{\text{N03\_N02}} = k_{\text{3rd}}(\text{temp}, \text{cair}, 2.4\text{E-}30, 3.0, 1.6\text{E-}12, -0.1, 0.6)$ .

G3110: The rate coefficient is defined as backward reaction divided by equilibrium constant.

G3203: The rate coefficient is:  $k_{\text{N02\_H02}} = k_{\text{3rd}}(\text{temp}, \text{cair}, 1.9\text{E-}31, 3.4, 4.0\text{E-}12, 0.3, 0.6)$ .

G3206: The rate coefficient is:  $k_{\text{HN03\_OH}} = 1.32\text{E-}14 * \text{EXP}(527/\text{temp}) + 1 / (1 / (7.39\text{E-}32 * \text{EXP}(453/\text{temp}) * \text{cair}) + 1 / (9.73\text{E-}17 * \text{EXP}(1910/\text{temp})))$

G3207: The rate coefficient is defined as backward reaction divided by equilibrium constant.

G4103: Sander et al. (2006) recommend a zero product yield for HCHO.

G4109: The same temperature dependence assumed as for  $\text{CH}_3\text{CHO} + \text{NO}_3$ . At 298 K,  $k = 5.8 \times 10^{-16}$ .

G4201: The product distribution is from Rickard and Pascoe (2009), after substitution of the Criegee intermediate by its decomposition products.

G4206: The product  $\text{C}_2\text{H}_5\text{OH}$ , which reacts only with OH, is substituted by its degradation products  $\approx 0.1 \text{HOCH}_2\text{CH}_2\text{O}_2 + 0.9 \text{CH}_3\text{CHO} + 0.9 \text{HO}_2$ .

G4207: Same value as for G4107

G4213: The rate coefficient is:  $k_{\text{CH3C03\_N02}} = k_{\text{3rd}}(\text{temp}, \text{cair}, 9.7\text{E-}29, 5.6, 9.3\text{E-}12, 1.5, 0.6)$ .

G4221: The rate coefficient  $\text{isk\_PAN\_M} = k_{\text{CH3C03\_N02}} / 9.5\text{E-}29 * \text{EXP}(-14000./\text{temp})$ , i.e. the rate coefficient is defined as backward reaction divided by equilibrium constant.

G4307: Same value as for G4107

G4315: Same value as for G4107

G4401: Same value as for G4306

G4402: Same value as for G4304

G4403: Same value as for G4305

G4404: Same value as for G4107

G4414: Same value as for G4304

G4415: Same value as for G4305

G4416: Same value as for G4107

G4419: Same value as for G4221

G6103: The rate coefficient is defined as backward reaction divided by equilibrium constant.

G6204: At low temperatures, there may be a minor reaction channel leading to  $\text{O}_3 + \text{HCl}$ . See Finkbeiner et al. (1995) for details. It is neglected here.

G6402: The initial products are probably HCl and  $\text{CH}_2\text{OOH}$  (Atkinson et al., 2006). It is assumed that  $\text{CH}_2\text{OOH}$  dissociates into HCHO and OH.

G6405: Sander et al. (2006), but simplified shortcut to release all Cl

G7302: The rate coefficient is:  $k_{\text{Br0\_N02}} = k_{\text{3rd}}(\text{temp}, \text{cair}, 5.2\text{E-}31, 3.2, 6.9\text{E-}12, 2.9, 0.6)$ .

G7303: The rate coefficient is defined as backward reaction (Atkinson et al., 2007) divided by equilibrium constant (Orlando and Tyndall, 1996).

G7407: It is assumed that the reaction liberates all Br atoms. The fate of the carbon atom is currently not considered.

G7408: It is assumed that the reaction liberates all Br atoms. The fate of the carbon atom is currently not considered.

G7605: Same value as for G7408:  $\text{CH}_2\text{Br}_2 + \text{OH}$  assumed. It is assumed that the reaction liberates all

Br and all Cl. The fate of the carbon atom is currently not considered.

G7606: Same value as for G7408:  $\text{CH}_2\text{Br}_2 + \text{OH}$  assumed. It is assumed that the reaction liberates all Br atoms and also Cl. The fate of the carbon atom is currently not considered.

G7607: It is assumed that the reaction liberates all Br atoms and also Cl. The fate of the carbon atom is currently not considered.

G9400a: For the abstraction path, the assumed reaction sequence (omitting  $\text{H}_2\text{O}$  and  $\text{O}_2$  as products) according to Yin et al. (1990) is:

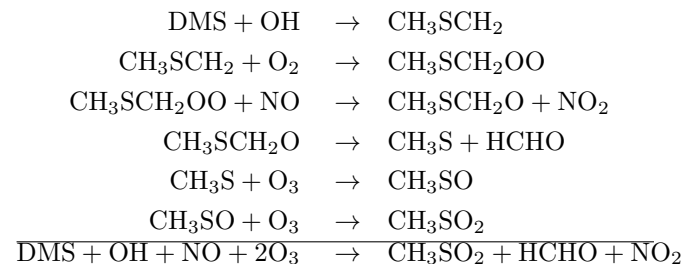

Neglecting the effect on  $\text{O}_3$  and  $\text{NO}_x$ , the remaining reaction is:

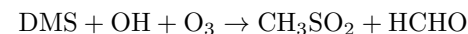

G9400b: For the addition path, the rate coefficient is:  $k_{\text{DMS\_OH}} = 1.0\text{E-}39 * \text{EXP}(5820./\text{temp}) * \text{C}(\text{ind\_02}) / (1. + 5.0\text{E-}30 * \text{EXP}(6280./\text{temp}) * \text{C}(\text{ind\_02}))$ .

G5300dc01: Kono and Matsumi 2001

G5300dc04: force and wiesenfeld 1981

G6500dc05: physical quenching ( $\text{O1D-}\dot{\text{O}}\text{3P}$ ) Warren 1991

G5300dc06: Kono and Matsumi

G5300dc08: Kono and Matsumi



Table 2: Photolysis reactions

| #       | labels    | reaction                                                                                                                                                | rate coefficient  | reference            |
|---------|-----------|---------------------------------------------------------------------------------------------------------------------------------------------------------|-------------------|----------------------|
| J (gas) |           |                                                                                                                                                         |                   |                      |
| J1000a  | UpStTrGJ  | $O_2 + h\nu \rightarrow 1.0 \text{ o3prodo2} + 2.0 \text{ ProdO3} + O(^3P) + O(^3P)$                                                                    | jx(ip_02)         | Sander et al. (2014) |
| J1001a  | UpStTrGJ  | $O_3 + h\nu \rightarrow O(^1D) + O_2$                                                                                                                   | jx(ip_01D)        | Sander et al. (2014) |
| J1001b  | UpStTrGJ  | $O_3 + h\nu \rightarrow O(^3P) + O_2$                                                                                                                   | jx(ip_03P)        | Sander et al. (2014) |
| J2100a  | UpStGJ    | $H_2O + h\nu \rightarrow \text{LossH2O} + H + OH$                                                                                                       | jx(ip_H20)        | Sander et al. (2014) |
| J2101   | UpStTrGJ  | $H_2O_2 + h\nu \rightarrow 2 \text{ OH}$                                                                                                                | jx(ip_H202)       | Sander et al. (2014) |
| J3100   | UpStGJN   | $N_2O + h\nu \rightarrow 1.0 \text{ o3prodnoy} + 1.0 \text{ ProdO3} + O(^1D) + N_2$                                                                     | jx(ip_N20)        | Sander et al. (2014) |
| J3101   | UpStTrGJN | $NO_2 + h\nu \rightarrow NO + O(^3P)$                                                                                                                   | jx(ip_N02)        | Sander et al. (2014) |
| J3102a  | UpStGJN   | $NO + h\nu \rightarrow 1.0 \text{ o3prodnoy} + 1.0 \text{ ProdO3} + N + O(^3P)$                                                                         | jx(ip_NO)         | Sander et al. (2014) |
| J3103a  | UpStTrGJN | $NO_3 + h\nu \rightarrow NO_2 + O(^3P)$                                                                                                                 | jx(ip_N020)       | Sander et al. (2014) |
| J3103b  | UpStTrGJN | $NO_3 + h\nu \rightarrow 2.0 \text{ o3lossno} + 2.0 \text{ LossO3N} + 2.0 \text{ LossO3} + NO + O_2$                                                    | jx(ip_N002)       | Sander et al. (2014) |
| J3104   | StTrGJN   | $N_2O_5 + h\nu \rightarrow NO_2 + NO_3$                                                                                                                 | jx(ip_N205)       | Sander et al. (2014) |
| J3200   | TrGJN     | $HONO + h\nu \rightarrow 1. \text{ LossJ3200} + NO + OH$                                                                                                | jx(ip_H0N0)       | Sander et al. (2014) |
| J3201   | StTrGJN   | $HNO_3 + h\nu \rightarrow 1. \text{ LossJ3201} + NO_2 + OH$                                                                                             | jx(ip_HN03)       | Sander et al. (2014) |
| J3202   | StTrGJN   | $HNO_4 + h\nu \rightarrow 0.333 \text{ o3prodnoy} + 0.333 \text{ ProdO3} + .667 \text{ NO}_2 + .667 \text{ HO}_2 + .333 \text{ NO}_3 + .333 \text{ OH}$ | jx(ip_HN04)       | Sander et al. (2014) |
| J4100   | StTrGJ    | $CH_3OOH + h\nu \rightarrow HCHO + OH + HO_2$                                                                                                           | jx(ip_CH300H)     | Sander et al. (2014) |
| J4101a  | StTrGJ    | $HCHO + h\nu \rightarrow H_2 + CO$                                                                                                                      | jx(ip_COH2)       | Sander et al. (2014) |
| J4101b  | StTrGJ    | $HCHO + h\nu \rightarrow 1. \text{ HO2prodNMHCphoto} + 1. \text{ LossJ4101b} + H + CO + HO_2$                                                           | jx(ip_CH0H)       | Sander et al. (2014) |
| J4102   | StGJ      | $CO_2 + h\nu \rightarrow 1.0 \text{ o3produntagged} + 1.0 \text{ ProdO3} + CO + O(^3P)$                                                                 | jx(ip_C02)        | Sander et al. (2014) |
| J4103   | StGJ      | $CH_4 + h\nu \rightarrow 1.155 \text{ ProdH2O} + CO + 0.31 \text{ H} + 0.69 \text{ H}_2 + 1.155 \text{ H}_2O$                                           | jx(ip_CH4)        | Sander et al. (2014) |
| J4200   | TrGJC     | $C_2H_5OOH + h\nu \rightarrow CH_3CHO + HO_2 + OH$                                                                                                      | jx(ip_CH300H)     | von Kuhlmann (2001)  |
| J4201   | TrGJC     | $CH_3CHO + h\nu \rightarrow 1. \text{ HO2prodNMHCphoto} + CH_3O_2 + HO_2 + CO$                                                                          | jx(ip_CH3CHO)     | Sander et al. (2014) |
| J4202   | TrGJC     | $CH_3C(O)OOH + h\nu \rightarrow CH_3O_2 + OH + CO_2$                                                                                                    | jx(ip_CH3C03H)    | Sander et al. (2014) |
| J4203   | TrGJCN    | $NACA + h\nu \rightarrow NO_2 + HCHO + CO$                                                                                                              | 0.19*jx(ip_CH0H)  | von Kuhlmann (2001)  |
| J4204   | TrGJCN    | $PAN + h\nu \rightarrow CH_3C(O)OO + NO_2$                                                                                                              | jx(ip_PAN)        | Sander et al. (2014) |
| J4300   | TrGJC     | $iC_3H_7OOH + h\nu \rightarrow CH_3COCH_3 + HO_2 + OH$                                                                                                  | jx(ip_CH300H)     | von Kuhlmann (2001)  |
| J4301   | TrGJC     | $CH_3COCH_3 + h\nu \rightarrow CH_3C(O)OO + CH_3O_2$                                                                                                    | jx(ip_CH3C0CH3)   | Sander et al. (2014) |
| J4302   | TrGJC     | $CH_3COCH_2OH + h\nu \rightarrow 1. \text{ HO2prodNMHCphoto} + CH_3C(O)OO + HCHO + HO_2$                                                                | 0.074*jx(ip_CH0H) | see note*            |



Table 2: Photolysis reactions (... continued)

| #      | labels    | reaction                                                                                                                                                                                             | rate coefficient                                         | reference                   |
|--------|-----------|------------------------------------------------------------------------------------------------------------------------------------------------------------------------------------------------------|----------------------------------------------------------|-----------------------------|
| J4303  | TrGJC     | $\text{MGLYOX} + h\nu \rightarrow 1. \text{HO2prodNMHCphoto} + \text{CH}_3\text{C(O)OO} + \text{CO} + \text{HO}_2$                                                                                   | $\text{jx(ip\_MGLYOX)}$                                  | Sander et al. (2014)        |
| J4304  | TrGJC     | $\text{CH}_3\text{COCH}_2\text{O}_2\text{H} + h\nu \rightarrow \text{CH}_3\text{C(O)OO} + \text{HCHO} + \text{OH}$                                                                                   | $\text{jx(ip\_CH300H)}$                                  | see note*                   |
| J4306  | TrGJCN    | $\text{iC}_3\text{H}_7\text{ONO}_2 + h\nu \rightarrow 1. \text{HO2prodNMHCphoto} + \text{CH}_3\text{COCH}_3 + \text{NO}_2 + \text{HO}_2$                                                             | $3.7*\text{jx(ip\_PAN)}$                                 | von Kuhlmann et al. (2003)* |
| J4400  | TrGJC     | $\text{LC}_4\text{H}_9\text{OOH} + h\nu \rightarrow \text{OH} + .67 \text{MEK} + .67 \text{HO}_2 + .33 \text{C}_2\text{H}_5\text{O}_2 + .33 \text{CH}_3\text{CHO}$                                   | $\text{jx(ip\_CH300H)}$                                  | Rickard and Pascoe (2009)   |
| J4401  | TrGJC     | $\text{MVK} + h\nu \rightarrow 1. \text{HO2prodNMHCphoto} + \text{CH}_3\text{C(O)OO} + \text{HCHO} + \text{CO} + \text{HO}_2$                                                                        | $0.019*\text{jx(ip\_COH2)} + .015*\text{jx(ip\_MGLYOX)}$ | Sander et al. (2014)        |
| J4402  | TrGJC     | $\text{MVKOOH} + h\nu \rightarrow \text{OH} + .5 \text{MGLYOX} + .25 \text{CH}_3\text{COCH}_2\text{OH} + .75 \text{HCHO} + .75 \text{HO}_2 + .25 \text{CH}_3\text{C(O)OO} + .25 \text{CO}$           | $\text{jx(ip\_CH300H)}$                                  | see note*                   |
| J4403  | TrGJC     | $\text{MEK} + h\nu \rightarrow \text{CH}_3\text{C(O)OO} + \text{C}_2\text{H}_5\text{O}_2$                                                                                                            | $0.42*\text{jx(ip\_CHOH)}$                               | von Kuhlmann et al. (2003)  |
| J4404  | TrGJC     | $\text{LMEKOOH} + h\nu \rightarrow \text{CH}_3\text{C(O)OO} + \text{CH}_3\text{CHO} + \text{OH}$                                                                                                     | $\text{jx(ip\_CH300H)}$                                  | Rickard and Pascoe (2009)   |
| J4405  | TrGJC     | $\text{BIACET} + h\nu \rightarrow 2 \text{CH}_3\text{C(O)OO}$                                                                                                                                        | $2.15*\text{jx(ip\_MGLYOX)}$                             | see note*                   |
| J4406  | TrGJCN    | $\text{LC}_4\text{H}_9\text{NO}_3 + h\nu \rightarrow 0.67 \text{HO2prodNMHCphoto} + \text{NO}_2 + .67 \text{MEK} + .67 \text{HO}_2 + .33 \text{C}_2\text{H}_5\text{O}_2 + .33 \text{CH}_3\text{CHO}$ | $3.7*\text{jx(ip\_PAN)}$                                 | von Kuhlmann (2001)         |
| J4407  | TrGJCN    | $\text{MPAN} + h\nu \rightarrow \text{CH}_3\text{COCH}_2\text{OH} + \text{NO}_2$                                                                                                                     | $\text{jx(ip\_PAN)}$                                     | see note*                   |
| J4500  | TrGJC     | $\text{ISOOH} + h\nu \rightarrow \text{MVK} + \text{HCHO} + \text{HO}_2 + \text{OH}$                                                                                                                 | $\text{jx(ip\_CH300H)}$                                  | see note*                   |
| J4501  | TrGJCN    | $\text{ISON} + h\nu \rightarrow 1. \text{HO2prodNMHCphoto} + \text{MVK} + \text{HCHO} + \text{NO}_2 + \text{HO}_2$                                                                                   | $3.7*\text{jx(ip\_PAN)}$                                 | von Kuhlmann (2001)         |
| J6000  | StTrGJCl  | $\text{Cl}_2 + h\nu \rightarrow \text{Cl} + \text{Cl}$                                                                                                                                               | $\text{jx(ip\_Cl2)}$                                     | Sander et al. (2014)        |
| J6100  | StTrGJCl  | $\text{Cl}_2\text{O}_2 + h\nu \rightarrow 2.0 \text{o3lossxo} + 2.0 \text{LossO3Cl} + 2.0 \text{LossO3} + 2 \text{Cl}$                                                                               | $\text{jx(ip\_Cl2O2)}$                                   | Sander et al. (2014)        |
| J6101  | StTrGJCl  | $\text{OCIO} + h\nu \rightarrow 1.0 \text{o3produntagged} + 1.0 \text{ProdO3} + \text{ClO} + \text{O}(^3\text{P})$                                                                                   | $\text{jx(ip\_OC10)}$                                    | Sander et al. (2014)        |
| J6200  | StGJCl    | $\text{HCl} + h\nu \rightarrow \text{Cl} + \text{H}$                                                                                                                                                 | $\text{jx(ip\_HCl)}$                                     | Sander et al. (2014)        |
| J6201  | StTrGJCl  | $\text{HOCl} + h\nu \rightarrow 1.0 \text{o3lossxo} + 1.0 \text{LossO3Cl} + 1.0 \text{LossO3} + \text{OH} + \text{Cl}$                                                                               | $\text{jx(ip\_HOCl)}$                                    | Sander et al. (2014)        |
| J6300  | TrGJCIN   | $\text{ClNO}_2 + h\nu \rightarrow 1.0 \text{o3produntagged} + 1.0 \text{ProdO3} + \text{Cl} + \text{NO}_2$                                                                                           | $\text{jx(ip\_ClNO2)}$                                   | Sander et al. (2014)        |
| J6301a | StTrGJCIN | $\text{ClNO}_3 + h\nu \rightarrow \text{Cl} + \text{NO}_3$                                                                                                                                           | $\text{jx(ip\_ClNO3)}$                                   | Sander et al. (2014)        |
| J6301b | StTrGJCIN | $\text{ClNO}_3 + h\nu \rightarrow \text{ClO} + \text{NO}_2$                                                                                                                                          | $\text{jx(ip\_ClON02)}$                                  | Sander et al. (2014)        |
| J6400  | StGJCl    | $\text{CH}_3\text{Cl} + h\nu \rightarrow 1.0 \text{ProdLCl} + \text{Cl} + \text{CH}_3\text{O}_2$                                                                                                     | $\text{jx(ip\_CH3Cl)}$                                   | Sander et al. (2014)        |
| J6401  | StGJCl    | $\text{CCl}_4 + h\nu \rightarrow 4.0 \text{ProdLCl} + \text{LCARBON} + 4 \text{Cl}$                                                                                                                  | $\text{jx(ip\_CC14)}$                                    | Sander et al. (2014)        |
| J6402  | StGJCCl   | $\text{CH}_3\text{CCl}_3 + h\nu \rightarrow 3.0 \text{ProdLCl} + 2 \text{LCARBON} + 3 \text{Cl}$                                                                                                     | $\text{jx(ip\_CH3CC13)}$                                 | Sander et al. (2014)        |
| J6500  | StGJCIF   | $\text{CFCl}_3 + h\nu \rightarrow 3.0 \text{ProdLCl} + 3 \text{Cl} + \text{LCARBON} + \text{LFLUORINE}$                                                                                              | $\text{jx(ip\_CFC13)}$                                   | Sander et al. (2014)        |



Table 2: Photolysis reactions (... continued)

| #         | labels     | reaction                                                                                                                                             | rate coefficient            | reference                 |
|-----------|------------|------------------------------------------------------------------------------------------------------------------------------------------------------|-----------------------------|---------------------------|
| J6501     | StGJClF    | $\text{CF}_2\text{Cl}_2 + h\nu \rightarrow 2.0 \text{ ProdLCl} + 2 \text{ Cl} + \text{LCARBON} + 2 \text{ LFLUORINE}$                                | $\text{jx(ip\_CF2Cl2)}$     | Sander et al. (2014)      |
| J7000     | StTrGJBr   | $\text{Br}_2 + h\nu \rightarrow \text{Br} + \text{Br}$                                                                                               | $\text{jx(ip\_Br2)}$        | Sander et al. (2014)      |
| J7100     | StTrGJBr   | $\text{BrO} + h\nu \rightarrow \text{Br} + \text{O}(^3\text{P})$                                                                                     | $\text{jx(ip\_BrO)}$        | Sander et al. (2014)      |
| J7200     | StTrGJBr   | $\text{HOBr} + h\nu \rightarrow 1.0 \text{ o3lossxo} + 1.0 \text{ LossO3Br} + 1.0 \text{ LossO3} + \text{Br} + \text{OH}$                            | $\text{jx(ip\_HOBr)}$       | Sander et al. (2014)      |
| J7300     | TrGJBrN    | $\text{BrNO}_2 + h\nu \rightarrow 1.0 \text{ o3produntagged} + 1.0 \text{ ProdO3} + \text{Br} + \text{NO}_2$                                         | $\text{jx(ip\_BrNO2)}$      | Sander et al. (2014)      |
| J7301     | StTrGJBrN  | $\text{BrNO}_3 + h\nu \rightarrow .85 \text{ Br} + .85 \text{ NO}_3 + .15 \text{ BrO} + .15 \text{ NO}_2$                                            | $\text{jx(ip\_BrNO3)}$      | Sander et al. (2014)*     |
| J7400     | StGJBr     | $\text{CH}_3\text{Br} + h\nu \rightarrow 1.0 \text{ ProdLBr} + \text{Br} + \text{CH}_3\text{O}_2$                                                    | $\text{jx(ip\_CH3Br)}$      | Sander et al. (2014)      |
| J7401     | TrGJBr     | $\text{CH}_2\text{Br}_2 + h\nu \rightarrow 2.0 \text{ ProdSBr} + \text{LCARBON} + 2 \text{ Br}$                                                      | $\text{jx(ip\_CH2Br2)}$     | Sander et al. (2014)      |
| J7402     | TrGJBr     | $\text{CHBr}_3 + h\nu \rightarrow 3.0 \text{ ProdSBr} + \text{LCARBON} + 3 \text{ Br}$                                                               | $\text{jx(ip\_CHBr3)}$      | Sander et al. (2014)      |
| J7500     | StGJBrF    | $\text{CF}_3\text{Br} + h\nu \rightarrow 1.0 \text{ ProdLBr} + \text{LCARBON} + 3 \text{ LFLUORINE} + \text{Br}$                                     | $\text{jx(ip\_CF3Br)}$      | Sander et al. (2014)      |
| J7600     | StTrGJBrCl | $\text{BrCl} + h\nu \rightarrow \text{Br} + \text{Cl}$                                                                                               | $\text{jx(ip\_BrCl)}$       | Sander et al. (2014)      |
| J7601     | StGJBrClF  | $\text{CF}_2\text{ClBr} + h\nu \rightarrow 1.0 \text{ ProdLBr} + 1.0 \text{ ProdLCl} + \text{LCARBON} + 2 \text{ LFLUORINE} + \text{Br} + \text{Cl}$ | $\text{jx(ip\_CF2ClBr)}$    | Sander et al. (2014)      |
| J7602     | TrGJBrCl   | $\text{CH}_2\text{ClBr} + h\nu \rightarrow 1.0 \text{ ProdSBr} + 1.0 \text{ ProdSCl} + \text{LCARBON} + \text{Br} + \text{Cl}$                       | $\text{jx(ip\_CH2ClBr)}$    | Sander et al. (2014)      |
| J7603     | TrGJBrCl   | $\text{CHCl}_2\text{Br} + h\nu \rightarrow 1.0 \text{ ProdSBr} + 2.0 \text{ ProdSCl} + \text{LCARBON} + \text{Br} + 2 \text{ Cl}$                    | $\text{jx(ip\_CHCl2Br)}$    | Sander et al. (2014)      |
| J7604     | TrGJBrCl   | $\text{CHClBr}_2 + h\nu \rightarrow 2.0 \text{ ProdSBr} + 1.0 \text{ ProdSCl} + \text{LCARBON} + 2 \text{ Br} + \text{Cl}$                           | $\text{jx(ip\_CHClBr2)}$    | Sander et al. (2014)      |
| J8401     | StTrGJI    | $\text{CH}_3\text{I} + h\nu \rightarrow \text{CH}_3\text{O}_2$                                                                                       | $\text{JX(ip\_CH3I)}$       | Sander et al. (2014)      |
| J6500dc01 | StGJClF    | $\text{CHF}_2\text{Cl} + h\nu \rightarrow 1.0 \text{ ProdLCl} + \text{Cl} + \text{LCARBON} + 2 \text{ LFLUORINE}$                                    | $\text{jx(ip\_CHF2Cl)}$     | Burkholder et al. (2019)* |
| J6500dc02 | StGJCClF   | $\text{CF}_2\text{ClCFCl}_2 + h\nu \rightarrow 3.0 \text{ ProdLCl} + 3 \text{ Cl} + 2 \text{ LCARBON} + 3 \text{ LFLUORINE}$                         | $\text{jx(ip\_CF2ClCFC12)}$ | Burkholder et al. (2019)  |
| J6400dc01 | StGJCl     | $\text{CH}_2\text{Cl}_2 + h\nu \rightarrow 2.0 \text{ ProdLCl} + 2 \text{ Cl} + \text{LCARBON}$                                                      | $\text{jx(ip\_CH2Cl2)}$     | Burkholder et al. (2019)  |
| J6500dc03 | StGJCClF   | $\text{CH}_3\text{CFCl}_2 + h\nu \rightarrow 2.0 \text{ ProdLCl} + 2 \text{ Cl} + 2 \text{ LCARBON} + 1 \text{ LFLUORINE}$                           | $\text{jx(ip\_CH3CFC12)}$   | Burkholder et al. (2019)  |
| J6500dc04 | StGJCClF   | $\text{CF}_2\text{ClCF}_2\text{Cl} + h\nu \rightarrow 2.0 \text{ ProdLCl} + 2 \text{ Cl} + 2 \text{ LCARBON} + 4 \text{ LFLUORINE}$                  | $\text{jx(ip\_CF2ClCF2Cl)}$ | Burkholder et al. (2019)  |
| J6400dc02 | StGJCl     | $\text{CHCl}_3 + h\nu \rightarrow 3.0 \text{ ProdSCl} + 3 \text{ Cl} + \text{LCARBON}$                                                               | $\text{jx(ip\_CHCl3)}$      | Burkholder et al. (2019)  |
| J6500dc05 | StGJCClF   | $\text{CF}_3\text{CF}_2\text{Cl} + h\nu \rightarrow 1.0 \text{ ProdLCl} + \text{Cl} + 2 \text{ LCARBON} + 5 \text{ LFLUORINE}$                       | $\text{jx(ip\_CF3CF2Cl)}$   | Burkholder et al. (2019)  |



Table 2: Photolysis reactions (... continued)

| #            | labels  | reaction                                                                                                                       | rate coefficient                                  | reference                |
|--------------|---------|--------------------------------------------------------------------------------------------------------------------------------|---------------------------------------------------|--------------------------|
| J6500dc06    | StG     | $\text{CH}_2\text{F}_2 + \text{Cl} \rightarrow \text{HCl} + \text{LCARBON} + 2 \text{ LFLUORINE}$                              | $7.6\text{e-}12 * \text{EXP}(-1630./\text{temp})$ | Burkholder et al. (2019) |
| J6500pg01    | StGJ    | $\text{CH}_3\text{CF}_2\text{Cl} + h\nu \rightarrow 1.0 \text{ ProdLCl} + \text{Cl} + 2 \text{ LCARBON} + 2 \text{ LFLUORINE}$ | $\text{jx}(\text{ip\_CH3CF2Cl})$                  | Burkholder et al. (2019) |
| J7600pg01    | StGJ    | $\text{CBrF}_2\text{CBrF}_2 + h\nu \rightarrow 2.0 \text{ ProdLBr} + 2 \text{ Br} + 2 \text{ LCARBON} + 4 \text{ LFLUORINE}$   | $\text{jx}(\text{ip\_CBrF2CBrF2})$                | Burkholder et al. (2019) |
| J9000        | TrStGJS | $\text{OCS} + h\nu \rightarrow \text{CO} + \text{S}$                                                                           | $\text{JX}(\text{ip\_OCS})$                       | ████                     |
| J9001        | TrStGJS | $\text{SO}_2 + h\nu \rightarrow \text{SO} + \text{O}(^3\text{P})$                                                              | $60.*\text{JX}(\text{ip\_OCS})$                   | ████                     |
| J9002        | TrStGJS | $\text{SO}_3 + h\nu \rightarrow \text{SO}_2 + \text{O}(^3\text{P})$                                                            | $\text{JX}(\text{ip\_S03})$                       | ████                     |
| J9003        | TrStGJS | $\text{H}_2\text{SO}_4 + h\nu \rightarrow \text{ProdH}_2\text{O} + \text{SO}_3 + \text{H}_2\text{O}$                           | $\text{JX}(\text{ip\_H2S04})$                     | ████                     |
| PH (aqueous) |         |                                                                                                                                |                                                   |                          |

## General notes

*j*-values are calculated with an external module (e.g., JVAL) and then supplied to the MECCA chemistry.

Values that originate from the Master Chemical Mechanism (MCM) by Rickard and Pascoe (2009) are translated according in the following way:

$\text{j}(11) \rightarrow \text{jx}(\text{ip\_COH2})$   
 $\text{j}(12) \rightarrow \text{jx}(\text{ip\_CHOH})$   
 $\text{j}(15) \rightarrow \text{jx}(\text{ip\_HOCH2CHO})$   
 $\text{j}(18) \rightarrow \text{jx}(\text{ip\_MACR})$   
 $\text{j}(22) \rightarrow \text{jx}(\text{ip\_ACETOL})$   
 $\text{j}(23)+\text{j}(24) \rightarrow \text{jx}(\text{ip\_MVK})$   
 $\text{j}(31)+\text{j}(32)+\text{j}(33) \rightarrow \text{jx}(\text{ip\_GLYOX})$   
 $\text{j}(34) \rightarrow \text{jx}(\text{ip\_MGLYOX})$

$\text{j}(41) \rightarrow \text{jx}(\text{ip\_CH300H})$   
 $\text{j}(53) \rightarrow \text{j}(\text{isopropyl nitrate})$   
 $\text{j}(54) \rightarrow \text{j}(\text{isopropyl nitrate})$   
 $\text{j}(55) \rightarrow \text{j}(\text{isopropyl nitrate})$   
 $\text{j}(56)+\text{j}(57) \rightarrow \text{jx}(\text{ip\_NOA})$

## Specific notes

J4302: It is assumed that  $\text{J}(\text{CH}_3\text{COCH}_2\text{OH})$  is 0.074 times that of J4101b.

J4304: It is assumed that  $\text{J}(\text{CH}_3\text{COCH}_2\text{O}_2\text{H})$  is the same as  $\text{J}(\text{CH}_3\text{OOH})$ .

J4306: Following von Kuhlmann et al. (2003), we use  $\text{J}(\text{iC}_3\text{H}_7\text{ONO}_2) = 3.7 * \text{jx}(\text{ip\_PAN})$ .

J4402: It is assumed that  $\text{J}(\text{MVKOOH})$  is the same as  $\text{J}(\text{CH}_3\text{OOH})$ .

J4405: It is assumed that  $\text{J}(\text{BIACET})$  is 2.15 times larger than  $\text{J}(\text{MGLYOX})$ , consistent with the photolysis rate coefficients used in the MCM (Rickard and Pascoe, 2009).

J4407: It is assumed that  $\text{J}(\text{MPAN})$  is the same as  $\text{J}(\text{PAN})$ .

J4500: It is assumed that  $\text{J}(\text{ISOOH})$  is the same as  $\text{J}(\text{CH}_3\text{OOH})$ .

J7301: The quantum yields are recommended by Burkholder et al. (2015) for  $\lambda > 300\text{nm}$  and used here for the entire spectrum.

J6500dc01: OKAY!



Table 3: Reversible (Henry’s law) equilibria and irreversible (“heterogenous”) uptake

| # | labels | reaction | rate coefficient | reference |
|---|--------|----------|------------------|-----------|
|---|--------|----------|------------------|-----------|

## General notes

The forward (`k_exf`) and backward (`k_exb`) rate coefficients are calculated in subroutine `mecca_aero_calc_k_ex` in the file `messy_mecca_aero.f90` using accommodation coefficients and Henry’s law constants from chemprop (see `chemprop.pdf`).

For uptake of X ( $X = \text{N}_2\text{O}_5$ ,  $\text{ClNO}_3$ , or  $\text{BrNO}_3$ ) and

subsequent reaction with  $\text{H}_2\text{O}$ ,  $\text{Cl}^-$ , and  $\text{Br}^-$  in H3201, H6300, H6301, H6302, H7300, H7301, H7302, H7601, and H7602, we define:

$$k_{\text{exf}}(\text{X}) = \frac{k_{\text{mt}}(\text{X}) \times \text{LWC}}{[\text{H}_2\text{O}] + 5 \times 10^2 [\text{Cl}^-] + 3 \times 10^5 [\text{Br}^-]}$$

Here,  $k_{\text{mt}}$  = mass transfer coefficient, and LWC = liquid water content of the aerosol. The total uptake rate of X is only determined by  $k_{\text{mt}}$ . The factors only affect

the branching between hydrolysis and the halide reactions. The factor  $5 \times 10^2$  was chosen such that the chloride reaction dominates over hydrolysis at about  $[\text{Cl}^-] > 0.1 \text{ M}$  (see Fig. 3 in Behnke et al. (1997)), i.e. when the ratio  $[\text{H}_2\text{O}]/[\text{Cl}^-]$  is less than  $5 \times 10^2$ . The ratio  $5 \times 10^2 / 3 \times 10^5$  was chosen such that the reactions with chloride and bromide are roughly equal for sea water composition (Behnke et al., 1994). These ratios were measured for uptake of  $\text{N}_2\text{O}_5$ . Here, they are also used for  $\text{ClNO}_3$  and  $\text{BrNO}_3$ .



Table 4: Heterogeneous reactions

| #      | labels     | reaction                                                                                                                                                                                                                              | rate coefficient                                        | reference          |
|--------|------------|---------------------------------------------------------------------------------------------------------------------------------------------------------------------------------------------------------------------------------------|---------------------------------------------------------|--------------------|
| HET200 | StHetN     | $\text{N}_2\text{O}_5 + \text{H}_2\text{O} \rightarrow 1.0 \text{ o3lossno} + \text{LossH}_2\text{O} + 1.0 \text{ LossO}_3\text{N}$<br>$+ 1.0 \text{ LossO}_3 + 2 \text{ HNO}_3$                                                      | $\text{khet\_St}(\text{iht\_N205\_H2O})$                | see general notes* |
| HET201 | TrHetN     | $\text{N}_2\text{O}_5 \rightarrow 3.0 \text{ o3lossno} + 3.0 \text{ LossO}_3\text{N} + 3.0 \text{ LossO}_3 + 2$<br>$\text{NO}_3^-(\text{cs}) + 2 \text{ H}^+(\text{cs})$                                                              | $\text{khet\_Tr}(\text{iht\_N205})$                     | see general notes* |
| HET410 | StHetCl    | $\text{HOCl} + \text{HCl} \rightarrow 1.0 \text{ o3lossxo} + \text{ProdH}_2\text{O} + 1.0 \text{ LossO}_3\text{Cl}$<br>$+ 1.0 \text{ LossO}_3 + \text{Cl}_2 + \text{H}_2\text{O}$                                                     | $\text{khet\_St}(\text{iht\_HOCl\_HCl})$                | see general notes* |
| HET420 | StHetClN   | $\text{ClNO}_3 + \text{HCl} \rightarrow 1.0 \text{ o3lossno} + 0.5 \text{ LossO}_3\text{Cl} + 0.5$<br>$\text{LossO}_3\text{N} + 1.0 \text{ LossO}_3 + \text{Cl}_2 + \text{HNO}_3$                                                     | $\text{khet\_St}(\text{iht\_ClNO}_3\text{HCl})$         | see general notes* |
| HET421 | StHetClN   | $\text{ClNO}_3 + \text{H}_2\text{O} \rightarrow \text{LossH}_2\text{O} + \text{HOCl} + \text{HNO}_3$                                                                                                                                  | $\text{khet\_St}(\text{iht\_ClNO}_3\text{H}_2\text{O})$ | see general notes* |
| HET422 | StHetClN   | $\text{N}_2\text{O}_5 + \text{HCl} \rightarrow 2.0 \text{ o3lossno} + 1.0 \text{ LossO}_3\text{Cl} + 1.0 \text{ LossO}_3\text{N}$<br>$+ 2.0 \text{ LossO}_3 + \text{ClNO}_2 + \text{HNO}_3$                                           | $\text{khet\_St}(\text{iht\_N205\_HCl})$                | see general notes* |
| HET510 | StHetBr    | $\text{HOBr} + \text{HBr} \rightarrow 1.0 \text{ o3lossxo} + \text{ProdH}_2\text{O} + 1.0 \text{ LossO}_3\text{Br}$<br>$+ 1.0 \text{ LossO}_3 + \text{Br}_2 + \text{H}_2\text{O}$                                                     | $\text{khet\_St}(\text{iht\_HOBr\_HBr})$                | see general notes* |
| HET520 | StHetBrN   | $\text{BrNO}_3 + \text{H}_2\text{O} \rightarrow \text{LossH}_2\text{O} + \text{HOBr} + \text{HNO}_3$                                                                                                                                  | $\text{khet\_St}(\text{iht\_BrNO}_3\text{H}_2\text{O})$ | see general notes* |
| HET540 | StHetBrClN | $\text{ClNO}_3 + \text{HBr} \rightarrow 1.0 \text{ o3lossno} + 0.333333 \text{ LossO}_3\text{Br} +$<br>$0.333333 \text{ LossO}_3\text{Cl} + 0.333333 \text{ LossO}_3\text{N} + 1.0 \text{ LossO}_3 +$<br>$\text{BrCl} + \text{HNO}_3$ | $\text{khet\_St}(\text{iht\_ClNO}_3\text{HBr})$         | see general notes* |
| HET541 | StHetBrClN | $\text{BrNO}_3 + \text{HCl} \rightarrow 1.0 \text{ o3lossno} + 0.333333 \text{ LossO}_3\text{Br} +$<br>$0.333333 \text{ LossO}_3\text{Cl} + 0.333333 \text{ LossO}_3\text{N} + 1.0 \text{ LossO}_3 +$<br>$\text{BrCl} + \text{HNO}_3$ | $\text{khet\_St}(\text{iht\_BrNO}_3\text{HCl})$         | see general notes* |
| HET542 | StHetBrCl  | $\text{HOCl} + \text{HBr} \rightarrow 1.0 \text{ o3lossxo} + \text{ProdH}_2\text{O} + 0.5 \text{ LossO}_3\text{Br}$<br>$+ 0.5 \text{ LossO}_3\text{Cl} + 1.0 \text{ LossO}_3 + \text{BrCl} + \text{H}_2\text{O}$                      | $\text{khet\_St}(\text{iht\_HOCl\_HBr})$                | see general notes* |
| HET543 | StHetBrCl  | $\text{HOBr} + \text{HCl} \rightarrow 1.0 \text{ o3lossxo} + \text{ProdH}_2\text{O} + 0.5 \text{ LossO}_3\text{Br}$<br>$+ 0.5 \text{ LossO}_3\text{Cl} + 1.0 \text{ LossO}_3 + \text{BrCl} + \text{H}_2\text{O}$                      | $\text{khet\_St}(\text{iht\_HOBr\_HCl})$                | see general notes* |

## General notes

Heterogeneous reaction rates are calculated with an external module (e.g., MECCA\_KHET) and then supplied to the MECCA chemistry (see [www.messy-interface.org](http://www.messy-interface.org) for details)



Table 5: Acid-base and other equilibria

| # | labels | reaction | $K_0[M^{m-n}]$ | $-\Delta H/R[K]$ | reference |
|---|--------|----------|----------------|------------------|-----------|
|---|--------|----------|----------------|------------------|-----------|

Specific notes



Table 6: Aqueous phase reactions

| # | labels | reaction | $k_0$ [ $M^{1-n}s^{-1}$ ] | $-E_a/R[K]$ | reference |
|---|--------|----------|---------------------------|-------------|-----------|
|---|--------|----------|---------------------------|-------------|-----------|

**Specific notes**



## References

- Anderson, L. C. and Fahey, D. W.: Studies with  $\text{ClONO}_2$ : Thermal dissociation rate and catalytic conversion to NO using an NO/ $\text{O}_3$  chemiluminescence detector, *J. Phys. Chem.*, 94, 644–652, doi:10.1021/J100365A027, 1990.
- Aranda, A., Le Bras, G., La Verdet, G., and Poulet, G.: The  $\text{BrO} + \text{CH}_3\text{O}_2$  reaction: Kinetics and role in the atmospheric ozone budget, *Geophys. Res. Lett.*, 24, 2745–2748, doi:10.1029/97GL02686, 1997.
- Atkinson, R.: Gas-phase tropospheric chemistry of volatile organic compounds: 1. Alkanes and alkenes, *J. Phys. Chem. Ref. Data*, 26, 215–290, doi:10.1063/1.556012, 1997.
- Atkinson, R.: Kinetics of the gas-phase reactions of OH radicals with alkanes and cycloalkanes, *Atmos. Chem. Phys.*, 3, 2233–2307, doi:10.5194/ACP-3-2233-2003, 2003.
- Atkinson, R., Baulch, D. L., Cox, R. A., Crowley, J. N., Hampson, R. F., Hynes, R. G., Jenkin, M. E., Rossi, M. J., and Troe, J.: Evaluated kinetic and photochemical data for atmospheric chemistry: Volume I – gas phase reactions of  $\text{O}_x$ ,  $\text{HO}_x$ ,  $\text{NO}_x$  and  $\text{SO}_x$  species, *Atmos. Chem. Phys.*, 4, 1461–1738, doi:10.5194/ACP-4-1461-2004, 2004.
- Atkinson, R., Baulch, D. L., Cox, R. A., Crowley, J. N., Hampson, R. F., Hynes, R. G., Jenkin, M. E., Rossi, M. J., Troe, J., and IUPAC Subcommittee: Evaluated kinetic and photochemical data for atmospheric chemistry: Volume II – gas phase reactions of organic species, *Atmos. Chem. Phys.*, 6, 3625–4055, doi:10.5194/ACP-6-3625-2006, 2006.
- Atkinson, R., Baulch, D. L., Cox, R. A., Crowley, J. N., Hampson, R. F., Hynes, R. G., Jenkin, M. E., Rossi, M. J., and Troe, J.: Evaluated kinetic and photochemical data for atmospheric chemistry: Volume III – gas phase reactions of inorganic halogens, *Atmos. Chem. Phys.*, 7, 981–1191, doi:10.5194/ACP-7-981-2007, 2007.
- Barone, S. B., Turnipseed, A. A., and Ravishankara, A. R.: Role of adducts in the atmospheric oxidation of dimethyl sulfide, *Faraday Discuss.*, 100, 39–54, doi:10.1039/FD9950000039, 1995.
- Bedjanian, Y., Laverdet, G., and Le Bras, G.: Low-pressure study of the reaction of Cl atoms with isoprene, *J. Phys. Chem. A*, 102, 953–959, doi:10.1021/JP973336C, 1998.
- Behnke, W., Scheer, V., and Zetzsch, C.: Production of  $\text{BrNO}_2$ ,  $\text{Br}_2$  and  $\text{ClNO}_2$  from the reaction between sea spray aerosol and  $\text{N}_2\text{O}_5$ , *J. Aerosol Sci.*, 25, S277–S278, doi:10.1016/0021-8502(94)90369-7, 1994.
- Behnke, W., George, C., Scheer, V., and Zetzsch, C.: Production and decay of  $\text{ClNO}_2$  from the reaction of gaseous  $\text{N}_2\text{O}_5$  with NaCl solution: Bulk and aerosol experiments, *J. Geophys. Res.*, 102D, 3795–3804, doi:10.1029/96JD03057, 1997.
- Boyd, A. A., Flaud, P.-M., Daugey, N., and Lesclaux, R.: Rate constants for  $\text{RO}_2 + \text{HO}_2$  reactions measured under a large excess of  $\text{HO}_2$ , *J. Phys. Chem. A*, 107, 818–821, doi:10.1021/JP026581R, 2003.
- Burkholder, J. B., Sander, S. P., Abbatt, J., Barker, J. R., Huie, R. E., Kolb, C. E., Kurylo, M. J., Orkin, V. L., Wilmouth, D. M., and Wine, P. H.: Chemical Kinetics and Photochemical Data for Use in Atmospheric Studies, Evaluation No. 18, JPL Publication 15-10, Jet Propulsion Laboratory, Pasadena, <http://jpldataeval.jpl.nasa.gov>, 2015.
- Burkholder, J. B., Sander, S. P., Abbatt, J., Barker, J. R., Cappa, C., Crounse, J. D., Dibble, T. S., Huie, R. E., Kolb, C. E., Kurylo, M. J., Orkin, V. L., Percival, C. J., Wilmouth, D. M., and Wine, P. H.: Chemical Kinetics and Photochemical Data for Use in Atmospheric Studies, Evaluation No. 19, JPL Publication 19-5, Jet Propulsion Laboratory, Pasadena, <http://jpldataeval.jpl.nasa.gov>, 2019.
- Canosa-Mas, C. E., King, M. D., Lopez, R., Percival, C. J., Wayne, R. P., Shallcross, D. E., Pyle, J. A., and Daele, V.: Is the reaction between  $\text{CH}_3(\text{O})\text{O}_2$  and  $\text{NO}_3$  important in the night-time troposphere?, *J. Chem. Soc. Faraday Trans.*, 92, 2211–2222, doi:10.1039/FT9969202211, 1996.
- Clyne, M. A. A. and Cruse, H. W.: Atomic resonance fluorescence spectrometry for the rate constants of rapid bimolecular reactions. Part 2. Reactions  $\text{Cl} + \text{BrCl}$ ,  $\text{Cl} + \text{Br}_2$ ,  $\text{Cl} + \text{ICl}$ ,  $\text{Br} + \text{IBr}$ ,  $\text{Br} + \text{ICl}$ , *J. Chem. Soc. Faraday Trans. 2*, 68, 1377–1387, doi:10.1039/F29726801377, 1972.
- Dillon, T. J., Horowitz, A., Hölscher, D., Crowley, J. N., Vereecken, L., and Peeters, J.: Reaction of HO with hydroxyacetone ( $\text{HOCH}_2\text{C}(\text{O})\text{CH}_3$ ): rate coefficients (233–363 K) and mechanism, *Phys. Chem. Chem. Phys.*, 8, 236–246, doi:10.1039/B513056E, 2006.
- Dolson, D. A. and Leone, S. R.: A reinvestigation of the laser-initiated chlorine/hydrogen bromide chain reaction: absolute rate constants and the  $v = 2/v = 1$  ratio from chlorine atom + hydrogen bromide  $\rightarrow$  hydrogen chloride( $v$ ) + bromine atom, *J. Phys. Chem.*, 91, 3543–3550, doi:10.1021/J100297A016, 1987.
- Dulitz, K., Amedro, D., Dillon, T. J., Pozzer, A., and Crowley, J. N.: Temperature (208–318 K) and pressure (18–696 Torr) dependent rate coefficients for the reaction between OH and  $\text{HNO}_3$ , *Atmos. Chem.*



- Phys., 18, 2381–2394, doi:10.5194/acp-18-2381-2018, 2018.
- Finkbeiner, M., Crowley, J. N., Horie, O., Müller, R., Moortgat, G. K., and Crutzen, P. J.: Reaction between HO<sub>2</sub> and ClO: Product formation between 210 and 300 K, J. Phys. Chem., 99, 16 264–16 275, doi:10.1021/J100044A011, 1995.
- Hynes, A. J. and Wine, P. H.: The atmospheric chemistry of dimethylsulfoxide (DMSO) kinetics and mechanism of the OH + DMSO reaction, J. Atmos. Chem., 24, 23–37, doi:10.1007/BF00053821, 1996.
- Ingham, T., Bauer, D., Sander, R., Crutzen, P. J., and Crowley, J. N.: Kinetics and products of the reactions BrO + DMS and Br + DMS at 298 K, J. Phys. Chem. A, 103, 7199–7209, doi:10.1021/JP9905979, 1999.
- Jefferson, A., Nicovich, J. M., and Wine, P. H.: Temperature-dependent kinetics studies of the reactions Br(<sup>2</sup>P<sub>3/2</sub>) + CH<sub>3</sub>SCH<sub>3</sub> ⇌ CH<sub>3</sub>SCH<sub>2</sub> + HBr. Heat of formation of the CH<sub>3</sub>SCH<sub>2</sub> radical, J. Phys. Chem., 98, 7128–7135, doi:10.1021/J100080A006, 1994.
- Jenkin, M., Saunders, S. M., and Pilling, M. J.: The tropospheric degradation of volatile organic compounds: A protocol for mechanism development, Atmos. Environ., 31, 81–104, doi:10.1016/S1352-2310(96)00105-7, 1997.
- Kirchner, F. and Stockwell, W. R.: Effect of peroxy radical reactions on the predicted concentrations of ozone, nitrogenous compounds, and radicals, J. Geophys. Res., 101D, 21 007–21 022, doi:10.1029/96JD01519, 1996.
- Kohlmann, J.-P. and Poppe, D.: The tropospheric gas-phase degradation of NH<sub>3</sub> and its impact on the formation of N<sub>2</sub>O and NO<sub>x</sub>, J. Atmos. Chem., 32, 397–415, doi:10.1023/A:1006162910279, 1999.
- Kondo, O. and Benson, S. W.: Kinetics and equilibria in the system Br + CH<sub>3</sub>OOH ⇌ HBr + CH<sub>3</sub>OO. An upper limit for the heat of formation of the methylperoxy radical, J. Phys. Chem., 88, 6675–6680, doi:10.1021/J150670A034, 1984.
- Manion, J. A., Huie, R. E., Levin, R. D., Burgess, Jr., D. R., Orkin, V. L., Tsang, W., McGivern, W. S., Hudgens, J. W., Knyazev, V. D., Atkinson, D. B., Chai, E., Tereza, A. M., Lin, C.-Y., Allison, T. C., Mallard, W. G., Westley, F., Herron, J. T., Hampson, R. F., and Frizzell, D. H.: NIST Chemical Kinetics Database, NIST Standard Reference Database 17 (Web Version), <http://kinetics.nist.gov>, 2015.
- McCabe, D. C., Gierczak, T., Talukdar, R. K., and Ravishankara, A. R.: Kinetics of the reaction OH + CO under atmospheric conditions, Geophys. Res. Lett., 28, 3135–3138, doi:10.1029/2000GL012719, 2001.
- Müller, J.-F. and Brasseur, G.: IMAGES: A three-dimensional chemical transport model of the global troposphere, J. Geophys. Res., 100D, 16 445–16 490, doi:10.1029/94JD03254, 1995.
- Orlando, J. J. and Tyndall, G. S.: Rate coefficients for the thermal decomposition of BrONO<sub>2</sub> and the heat of formation of BrONO<sub>2</sub>, J. Phys. Chem., 100, 19 398–19 405, doi:10.1021/JP9620274, 1996.
- Orlando, J. J., Tyndall, G. S., Bertman, S. B., Chen, W., and Burkholder, J. B.: Rate coefficient for the reaction of OH with CH<sub>2</sub>=C(CH<sub>3</sub>)C(O)OONO<sub>2</sub> (MPAN), Atmos. Environ., 36, 1895–1900, doi:10.1016/S1352-2310(02)00090-0, 2002.
- Pöschl, U., von Kuhlmann, R., Poisson, N., and Crutzen, P. J.: Development and intercomparison of condensed isoprene oxidation mechanisms for global atmospheric modeling, J. Atmos. Chem., 37, 29–52, doi:10.1023/A:1006391009798, 2000.
- Rickard, A. and Pascoe, S.: The Master Chemical Mechanism (MCM), <http://mcm.leeds.ac.uk>, 2009.
- Roelofs, G.-J. and Lelieveld, J.: Model study of the influence of cross-tropopause O<sub>3</sub> transports of tropospheric O<sub>3</sub> levels, Tellus, 49B, 38–55, doi:10.3402/TELLUSB.V49I1.15949, 1997.
- Sander, R., Jöckel, P., Kirner, O., Kunert, A. T., Landgraf, J., and Pozzer, A.: The photolysis module JVAL-14, compatible with the MESSy standard, and the JVal PreProcessor (JVPP), Geosci. Model Dev., 7, 2653–2662, doi:10.5194/GMD-7-2653-2014, 2014.
- Sander, R., Baumgaertner, A., Cabrera-Perez, D., Frank, F., Gromov, S., Grooß, J.-U., Harder, H., Huijnen, V., Jöckel, P., Karydis, V. A., Niemeyer, K. E., Pozzer, A., Riede, H., Schultz, M. G., Taraborrelli, D., and Tauer, S.: The community atmospheric chemistry box model CAABA/MECCA-4.0, Geosci. Model Dev., 12, 1365–1385, doi:10.5194/gmd-12-1365-2019, 2019.
- Sander, S. P., Finlayson-Pitts, B. J., Friedl, R. R., Golden, D. M., Huie, R. E., Kolb, C. E., Kurylo, M. J., Molina, M. J., Moortgat, G. K., Orkin, V. L., and Ravishankara, A. R.: Chemical Kinetics and Photochemical Data for Use in Atmospheric Studies, Evaluation Number 14, JPL Publication 02-25, Jet Propulsion Laboratory, Pasadena, CA, 2003.
- Sander, S. P., Friedl, R. R., Golden, D. M., Kurylo, M. J., Moortgat, G. K., Keller-Rudek, H., Wine, P. H., Ravishankara, A. R., Kolb, C. E., Molina, M. J., Finlayson-Pitts, B. J., Huie, R. E., and Orkin,



- V. L.: Chemical Kinetics and Photochemical Data for Use in Atmospheric Studies, Evaluation Number 15, JPL Publication 06-2, Jet Propulsion Laboratory, Pasadena, CA, <http://jpldataeval.jpl.nasa.gov>, 2006.
- Sander, S. P., Abbatt, J., Barker, J. R., Burkholder, J. B., Friedl, R. R., Golden, D. M., Huie, R. E., Kolb, C. E., Kurylo, M. J., Moortgat, G. K., Orkin, V. L., and Wine, P. H.: Chemical Kinetics and Photochemical Data for Use in Atmospheric Studies, Evaluation No. 17, JPL Publication 10-6, Jet Propulsion Laboratory, Pasadena, <http://jpldataeval.jpl.nasa.gov>, 2011.
- Sivakumaran, V., Hölscher, D., Dillon, T. J., and Crowley, J. N.: Reaction between OH and HCHO: temperature dependent rate coefficients (202-399 K) and product pathways (298 K), *Phys. Chem. Chem. Phys.*, 5, 4821–4827, doi:10.1039/B306859E, 2003.
- Strekowski, R. S., Nicovich, J. M., and Wine, P. H.: Kinetic and mechanistic study of the Reactions of O(<sup>1</sup>D<sub>2</sub>) with HCN and CH<sub>3</sub>CN, *Chem. Phys. Chem.*, 11, 3942–3955, doi:10.1002/cphc.201000550, 2010.
- Tyndall, G. S., Staffelbach, T. A., Orlando, J. J., and Calvert, J. G.: Rate coefficients for the reactions of OH radicals with methylglyoxal and acetaldehyde, *Int. J. Chem. Kinet.*, 27, 1009–1020, doi:10.1002/KIN.550271006, 1995.
- Tyndall, G. S., Orlando, J. J., Wallington, T. J., Sehested, J., and Nielsen, O. J.: Kinetics of the reactions of acetonitrile with chlorine and fluorine atoms, *J. Phys. Chem.*, 100, 660–668, doi:10.1021/jp9521417, 1996.
- Tyndall, G. S., Cox, R. A., Granier, C., Lesclaux, R., Moortgat, G. K., Pilling, M. J., Ravishankara, A. R., and Wallington, T. J.: The atmospheric chemistry of small organic peroxy radicals, *J. Geophys. Res.*, 106D, 12 157–12 182, doi:10.1029/2000JD900746, 2001a.
- Tyndall, G. S., Orlando, J. J., Wallington, T. J., and Hurley, M. D.: Products of the chlorine-atom- and hydroxyl-radical-initiated oxidation of CH<sub>3</sub>CN, *J. Phys. Chem. A*, 105, 5380–5384, doi:10.1021/jp004318p, 2001b.
- von Kuhlmann, R.: Tropospheric photochemistry of ozone, its precursors and the hydroxyl radical: A 3D-modeling study considering non-methane hydrocarbons, Ph.D. thesis, Johannes Gutenberg-Universität, Mainz, Germany, 2001.
- von Kuhlmann, R., Lawrence, M. G., Crutzen, P. J., and Rasch, P. J.: A model for studies of tropospheric ozone and nonmethane hydrocarbons: Model description and ozone results, *J. Geophys. Res.*, 108D, 4294, doi:10.1029/2002JD002893, 2003.
- Wallington, T. J., Ammann, M., Cox, R. A., Crowley, J. N., Herrmann, H., Jenkin, M. E., McNeill, V., Mellouki, A., Rossi, M. J., and Troe, J.: IUPAC Task group on atmospheric chemical kinetic data evaluation: Evaluated kinetic data, <http://iupac.pole-ether.fr>, 2018.
- Yin, F., Grosjean, D., and Seinfeld, J. H.: Photooxidation of dimethyl sulfide and dimethyl disulfide. I: Mechanism development, *J. Atmos. Chem.*, 11, 309–364, doi:10.1007/BF00053780, 1990.
