# Supplementary material for: Ozone source attribution in polluted European areas during summer 2017 as simulated with MECO(n)
Source: Copernicus journal article supplement (doi:10.5194/acp-24-13503-2024), 2024-12-09
Supplement: Supplementary file 3 [file acp-24-13503-2024-supplement.zip]

# The Chemical Mechanism of SCAV

KPP version: 2.2.3\_rs3

SCAV version: 2.4.0

Date: June 8, 2022

Batch file: SC\_no-iodine\_no-mercury.bat

Integrator: rosenbrock\_mz

Gas equation file: gas.eqn

Replacement file:

Selected reactions:

“(Sc && !I && !Hg)”

Number of aerosol phases: 1

Number of species in selected mechanism:

Gas phase: 32

Aqueous phase: 56

All species: 88

Number of reactions in selected mechanism:

Gas phase (Gnnn): 0

Aqueous phase (Annn): 53

Henry (Hnnn): 62

Photolysis (Jnnn): 0

Aqueous phase photolysis (PHnnn): 1

Heterogeneous (HETnnn): 0

Equilibria (EQnn): 34

Isotope exchange (IEXnnn): 0

Tagging equations (TAGnnn): 0

Dummy (Dnn): 0

All equations: 150

Table 1: Gas phase reactions

| # | labels | reaction | rate coefficient | reference |
|---|--------|----------|------------------|-----------|
|---|--------|----------|------------------|-----------|

## General notes

### Three-body reactions

Rate coefficients for three-body reactions are defined via the function **k\_3rd**( $T, M, k_0^{300}, n, k_{\text{inf}}^{300}, m, f_c$ ). In the code, the temperature  $T$  is called **temp** and the concentration of “air molecules”  $M$  is called **cair**. Using the auxiliary variables  $k_0(T)$ ,  $k_{\text{inf}}(T)$ , and  $k_{\text{ratio}}$ , **k\_3rd** is defined as:

$$k_0(T) = k_0^{300} \times \left(\frac{300\text{K}}{T}\right)^n \quad (1)$$

$$k_{\text{inf}}(T) = k_{\text{inf}}^{300} \times \left(\frac{300\text{K}}{T}\right)^m \quad (2)$$

$$k_{\text{ratio}} = \frac{k_0(T)M}{k_{\text{inf}}(T)} \quad (3)$$

$$\mathbf{k\_3rd} = \frac{k_0(T)M}{1 + k_{\text{ratio}}} \times f_c^{\left(\frac{1}{1 + (\log_{10}(k_{\text{ratio}}))^2}\right)} \quad (4)$$

A similar function, called **k\_3rd\_iupac** here, is used by Wallington et al. (2018) for three-body reactions. It has the same function parameters as **k\_3rd** and it is defined as:

$$k_0(T) = k_0^{300} \times \left(\frac{300\text{K}}{T}\right)^n \quad (5)$$

$$k_{\text{inf}}(T) = k_{\text{inf}}^{300} \times \left(\frac{300\text{K}}{T}\right)^m \quad (6)$$

$$k_{\text{ratio}} = \frac{k_0(T)M}{k_{\text{inf}}(T)} \quad (7)$$

$$N = 0.75 - 1.27 \times \log_{10}(f_c) \quad (8)$$

$$\mathbf{k\_3rd\_iupac} = \frac{k_0(T)M}{1 + k_{\text{ratio}}} \times f_c^{\left(\frac{1}{1 + (\log_{10}(k_{\text{ratio}})/N)^2}\right)} \quad (9)$$

## Structure-Activity Relationships (SAR)

Some unmeasured rate coefficients are estimated with structure-activity relationships, using the following parameters and substituent factors:

| $k$ for H-abstraction by OH in $\text{cm}^{-3}\text{s}^{-1}$ |                                                                     |
|--------------------------------------------------------------|---------------------------------------------------------------------|
| <b>k_p</b>                                                   | $4.49 \times 10^{-18} \times (T/\text{K})^2 \exp(-320 \text{ K}/T)$ |
| <b>k_s</b>                                                   | $4.50 \times 10^{-18} \times (T/\text{K})^2 \exp(253 \text{ K}/T)$  |
| <b>k_t</b>                                                   | $2.12 \times 10^{-18} \times (T/\text{K})^2 \exp(696 \text{ K}/T)$  |
| <b>k_ROHRO</b>                                               | $2.1 \times 10^{-18} \times (T/\text{K})^2 \exp(-85 \text{ K}/T)$   |
| <b>k_CO2H</b>                                                | $0.7 \times k_{\text{CH}_3\text{CO}_2\text{H}+\text{OH}}$           |
| <b>k_ROOHRO</b>                                              | $0.6 \times k_{\text{CH}_3\text{OOH}+\text{OH}}$                    |
| <b>f_alk</b>                                                 | 1.23                                                                |
| <b>f_sOH</b>                                                 | 3.44                                                                |
| <b>f_tOH</b>                                                 | 2.68                                                                |
| <b>f_sOOH</b>                                                | 8.                                                                  |
| <b>f_tOOH</b>                                                | 8.                                                                  |
| <b>f_ONO2</b>                                                | 0.04                                                                |
| <b>f_CH2ON02</b>                                             | 0.20                                                                |
| <b>f_cpan</b>                                                | 0.25                                                                |
| <b>f_allyl</b>                                               | 3.6                                                                 |
| <b>f_CHO</b>                                                 | 0.55                                                                |
| <b>f_CO2H</b>                                                | 1.67                                                                |
| <b>f_CO</b>                                                  | 0.73                                                                |
| <b>f_O</b>                                                   | 8.15                                                                |
| <b>f_pCH2OH</b>                                              | 1.29                                                                |
| <b>f_tCH2OH</b>                                              | 0.53                                                                |

| $k$ for OH-addition to double bonds in $\text{cm}^{-3}\text{s}^{-1}$ |                                                                                                                    |
|----------------------------------------------------------------------|--------------------------------------------------------------------------------------------------------------------|
| <b>k_adp</b>                                                         | $4.5 \times 10^{-12} \times (T/300 \text{ K})^{-0.85}$                                                             |
| <b>k_ads</b>                                                         | $1/4 \times (1.1 \times 10^{-11} \times \exp(485 \text{ K}/T) + 1.0 \times 10^{-11} \times \exp(553 \text{ K}/T))$ |
| <b>k_adt</b>                                                         | $1.922 \times 10^{-11} \times \exp(450 \text{ K}/T) - k_{\text{ads}}$                                              |
| <b>k_adsecprim</b>                                                   | $3.0 \times 10^{-11}$                                                                                              |
| <b>k_adtertprim</b>                                                  | $5.7 \times 10^{-11}$                                                                                              |
| <b>a_PAN</b>                                                         | 0.56                                                                                                               |
| <b>a_CHO</b>                                                         | 0.31                                                                                                               |
| <b>a_COCH3</b>                                                       | 0.76                                                                                                               |
| <b>a_CH2OH</b>                                                       | 1.7                                                                                                                |
| <b>a_CH2OOH</b>                                                      | 1.7                                                                                                                |
| <b>a_COH</b>                                                         | 2.2                                                                                                                |
| <b>a_COOH</b>                                                        | 2.2                                                                                                                |
| <b>a_CO2H</b>                                                        | 0.25                                                                                                               |
| <b>a_CH2ON02</b>                                                     | 0.64                                                                                                               |

### RO<sub>2</sub> self and cross reactions

The self and cross reactions of organic peroxy radicals are treated according to the permutation reaction formalism as implemented in the MCM (Rickard and Pascoe, 2009), as described by Jenkin et al. (1997). Every organic peroxy radical reacts in a pseudo-first-order reaction with a rate constant that is expressed as  $k^{\text{1st}} = 2 \times \sqrt{k_{\text{self}} \times \mathbf{k\_CH302}} \times [\text{RO}_2]$  where  $k_{\text{self}}$  = second-order rate coefficient of the self reaction of the organic peroxy radical,  $\mathbf{k\_CH302}$  = second-order rate coefficient of the self reaction of  $\text{CH}_3\text{O}_2$ , and  $[\text{RO}_2]$  = sum of the concentrations of all organic peroxy radicals.

## Specific notes

Table 2: Photolysis reactions

| #            | labels   | reaction                                                                    | rate coefficient                             | reference |
|--------------|----------|-----------------------------------------------------------------------------|----------------------------------------------|-----------|
| J (gas)      |          |                                                                             |                                              |           |
| PH (aqueous) |          |                                                                             |                                              |           |
| PH2100_1     | TrAraScJ | $\text{H}_2\text{O}_2(\text{aq}) + h\nu \rightarrow 2 \text{OH}(\text{aq})$ | $1.0 * j_{\text{x}}(\text{ip\_H2O2}) * 2.33$ |           |

## General notes

$j$ -values are calculated with an external module (e.g., JVAL) and then supplied to the SCAV chemistry.

Values that originate from the Master Chemical Mechanism (MCM) by Rickard and Pascoe (2009) are translated according in the following way:

$j(11) \rightarrow j_{\text{x}}(\text{ip\_COH2})$

$j(12) \rightarrow j_{\text{x}}(\text{ip\_CHOH})$

$j(15) \rightarrow j_{\text{x}}(\text{ip\_HOCH2CHO})$

$j(18) \rightarrow j_{\text{x}}(\text{ip\_MACR})$

$j(22) \rightarrow j_{\text{x}}(\text{ip\_ACETOL})$

$j(23)+j(24) \rightarrow j_{\text{x}}(\text{ip\_MVK})$

$j(31)+j(32)+j(33) \rightarrow j_{\text{x}}(\text{ip\_GLYOX})$

$j(34) \rightarrow j_{\text{x}}(\text{ip\_MGLYOX})$

$j(41) \rightarrow j_{\text{x}}(\text{ip\_CH3OOH})$

$j(53) \rightarrow j(\text{isopropyl nitrate})$

$j(54) \rightarrow j(\text{isopropyl nitrate})$

$j(55) \rightarrow j(\text{isopropyl nitrate})$

$j(56)+j(57) \rightarrow j_{\text{x}}(\text{ip\_NOA})$

## Specific notes

Table 3: Reversible (Henry’s law) equilibria and irreversible (“heterogenous”) uptake

| #        | labels        | reaction                                   | rate coefficient                 | reference                                  |
|----------|---------------|--------------------------------------------|----------------------------------|--------------------------------------------|
| H1000f_1 | TrAlSc        | $O_2 \rightarrow O_2(aq)$                  | $k_{exf(ind\_O2)}$               | see general notes*                         |
| H1000b_1 | TrAlSc        | $O_2(aq) \rightarrow O_2$                  | $k_{exb(ind\_O2)}$               | see general notes*                         |
| H1001f_1 | TrAlMblScScm  | $O_3 \rightarrow O_3(aq)$                  | $k_{exf(ind\_O3)}$               | see general notes*                         |
| H1001b_1 | TrAlMblScScm  | $O_3(aq) \rightarrow O_3$                  | $k_{exb(ind\_O3)}$               | see general notes*                         |
| H2100f_1 | TrAlSc        | $OH \rightarrow OH(aq)$                    | $k_{exf(ind\_OH)}$               | see general notes*                         |
| H2100b_1 | TrAlSc        | $OH(aq) \rightarrow OH$                    | $k_{exb(ind\_OH)}$               | see general notes*                         |
| H2101f_1 | TrAlSc        | $HO_2 \rightarrow HO_2(aq)$                | $k_{exf(ind\_HO2)}$              | see general notes*                         |
| H2101b_1 | TrAlSc        | $HO_2(aq) \rightarrow HO_2$                | $k_{exb(ind\_HO2)}$              | see general notes*                         |
| H2102f_1 | TrAlMblScScm  | $H_2O_2 \rightarrow H_2O_2(aq)$            | $k_{exf(ind\_H2O2)}$             | see general notes*                         |
| H2102b_1 | TrAlMblScScm  | $H_2O_2(aq) \rightarrow H_2O_2$            | $k_{exb(ind\_H2O2)}$             | see general notes*                         |
| H3100f_1 | TrAraScN      | $NO \rightarrow NO(aq)$                    | $k_{exf(ind\_NO)}$               | see general notes*                         |
| H3100b_1 | TrAraScN      | $NO(aq) \rightarrow NO$                    | $k_{exb(ind\_NO)}$               | see general notes*                         |
| H3101f_1 | TrAlScN       | $NO_2 \rightarrow NO_2(aq)$                | $k_{exf(ind\_NO2)}$              | see general notes*                         |
| H3101b_1 | TrAlScN       | $NO_2(aq) \rightarrow NO_2$                | $k_{exb(ind\_NO2)}$              | see general notes*                         |
| H3102f_1 | TrAlScN       | $NO_3 \rightarrow NO_3(aq)$                | $k_{exf(ind\_NO3)}$              | see general notes*                         |
| H3102b_1 | TrAlScN       | $NO_3(aq) \rightarrow NO_3$                | $k_{exb(ind\_NO3)}$              | see general notes*                         |
| H3200f_1 | TrAlMblScScmN | $NH_3 \rightarrow NH_3(aq)$                | $k_{exf(ind\_NH3)}$              | see general notes*                         |
| H3200b_1 | TrAlMblScScmN | $NH_3(aq) \rightarrow NH_3$                | $k_{exb(ind\_NH3)}$              | see general notes*                         |
| H3201_1  | TrAlMblScScmN | $N_2O_5 \rightarrow HNO_3(aq) + HNO_3(aq)$ | $k_{exf\_N205 * C(ind\_H2O\_1)}$ | Behnke et al. (1994), Behnke et al. (1997) |
| H3202f_1 | TrAlScN       | $HONO \rightarrow HONO(aq)$                | $k_{exf(ind\_HONO)}$             | see general notes*                         |
| H3202b_1 | TrAlScN       | $HONO(aq) \rightarrow HONO$                | $k_{exb(ind\_HONO)}$             | see general notes*                         |
| H3203f_1 | TrAlMblScScmN | $HNO_3 \rightarrow HNO_3(aq)$              | $k_{exf(ind\_HNO3)}$             | see general notes*                         |
| H3203b_1 | TrAlMblScScmN | $HNO_3(aq) \rightarrow HNO_3$              | $k_{exb(ind\_HNO3)}$             | see general notes*                         |
| H3204f_1 | TrAlScN       | $HNO_4 \rightarrow HNO_4(aq)$              | $k_{exf(ind\_HNO4)}$             | see general notes*                         |
| H3204b_1 | TrAlScN       | $HNO_4(aq) \rightarrow HNO_4$              | $k_{exb(ind\_HNO4)}$             | see general notes*                         |
| H4100f_1 | TrAlMblScScm  | $CO_2 \rightarrow CO_2(aq)$                | $k_{exf(ind\_CO2)}$              | see general notes*                         |
| H4100b_1 | TrAlMblScScm  | $CO_2(aq) \rightarrow CO_2$                | $k_{exb(ind\_CO2)}$              | see general notes*                         |
| H4101f_1 | TrAlScScm     | $HCHO \rightarrow HCHO(aq)$                | $k_{exf(ind\_HCHO)}$             | see general notes*                         |
| H4101b_1 | TrAlScScm     | $HCHO(aq) \rightarrow HCHO$                | $k_{exb(ind\_HCHO)}$             | see general notes*                         |
| H4102f_1 | TrAlSc        | $CH_3O_2 \rightarrow CH_3OO(aq)$           | $k_{exf(ind\_CH3O2)}$            | see general notes*                         |
| H4102b_1 | TrAlSc        | $CH_3OO(aq) \rightarrow CH_3O_2$           | $k_{exb(ind\_CH3O2)}$            | see general notes*                         |
| H4103f_1 | TrAlScScm     | $HCOOH \rightarrow HCOOH(aq)$              | $k_{exf(ind\_HCOOH)}$            | see general notes*                         |
| H4103b_1 | TrAlScScm     | $HCOOH(aq) \rightarrow HCOOH$              | $k_{exb(ind\_HCOOH)}$            | see general notes*                         |

Table 3: Reversible (Henry’s law) equilibria and irreversible (“heterogenous”) uptake

| #        | labels         | reaction                                                                   | rate coefficient                                     | reference          |
|----------|----------------|----------------------------------------------------------------------------|------------------------------------------------------|--------------------|
| H4104f_1 | TrAlScScm      | $\text{CH}_3\text{OOH} \rightarrow \text{CH}_3\text{OOH(aq)}$              | $k_{\text{exf}}(\text{ind\_CH300H})$                 | see general notes* |
| H4104b_1 | TrAlScScm      | $\text{CH}_3\text{OOH(aq)} \rightarrow \text{CH}_3\text{OOH}$              | $k_{\text{exb}}(\text{ind\_CH300H})$                 | see general notes* |
| H4105f_1 | TrAraSc        | $\text{CH}_3\text{OH} \rightarrow \text{CH}_3\text{OH(aq)}$                | $k_{\text{exf}}(\text{ind\_CH30H})$                  | see general notes* |
| H4105b_1 | TrAraSc        | $\text{CH}_3\text{OH(aq)} \rightarrow \text{CH}_3\text{OH}$                | $k_{\text{exb}}(\text{ind\_CH30H})$                  | see general notes* |
| H4200f_1 | TrAraScScmC    | $\text{CH}_3\text{COOH} \rightarrow \text{CH}_3\text{COOH(aq)}$            | $k_{\text{exf}}(\text{ind\_CH3C02H})$                | see general notes* |
| H4200b_1 | TrAraScScmC    | $\text{CH}_3\text{COOH(aq)} \rightarrow \text{CH}_3\text{COOH}$            | $k_{\text{exb}}(\text{ind\_CH3C02H})$                | see general notes* |
| H4201f_1 | TrAraScC       | $\text{CH}_3\text{CHO} \rightarrow \text{CH}_3\text{CHO(aq)}$              | $k_{\text{exf}}(\text{ind\_CH3CH0})$                 | see general notes* |
| H4201b_1 | TrAraScC       | $\text{CH}_3\text{CHO(aq)} \rightarrow \text{CH}_3\text{CHO}$              | $k_{\text{exb}}(\text{ind\_CH3CH0})$                 | see general notes* |
| H4202f_1 | TrAraScCN      | $\text{PAN} \rightarrow \text{PAN(aq)}$                                    | $k_{\text{exf}}(\text{ind\_PAN})$                    | see general notes* |
| H4202b_1 | TrAraScCN      | $\text{PAN(aq)} \rightarrow \text{PAN}$                                    | $k_{\text{exb}}(\text{ind\_PAN})$                    | see general notes* |
| H4300f_1 | TrAraScC       | $\text{CH}_3\text{COCH}_3 \rightarrow \text{CH}_3\text{COCH}_3(\text{aq})$ | $k_{\text{exf}}(\text{ind\_CH3C0CH3})$               | see general notes* |
| H4300b_1 | TrAraScC       | $\text{CH}_3\text{COCH}_3(\text{aq}) \rightarrow \text{CH}_3\text{COCH}_3$ | $k_{\text{exb}}(\text{ind\_CH3C0CH3})$               | see general notes* |
| H6000f_1 | TrAlMblScCl    | $\text{Cl}_2 \rightarrow \text{Cl}_2(\text{aq})$                           | $k_{\text{exf}}(\text{ind\_Cl2})$                    | see general notes* |
| H6000b_1 | TrAlMblScCl    | $\text{Cl}_2(\text{aq}) \rightarrow \text{Cl}_2$                           | $k_{\text{exb}}(\text{ind\_Cl2})$                    | see general notes* |
| H6200f_1 | TrAlMblScScmCl | $\text{HCl} \rightarrow \text{HCl(aq)}$                                    | $k_{\text{exf}}(\text{ind\_HCl})$                    | see general notes* |
| H6200b_1 | TrAlMblScScmCl | $\text{HCl(aq)} \rightarrow \text{HCl}$                                    | $k_{\text{exb}}(\text{ind\_HCl})$                    | see general notes* |
| H6201f_1 | TrAlMblScCl    | $\text{HOCl} \rightarrow \text{HOCl(aq)}$                                  | $k_{\text{exf}}(\text{ind\_H0Cl})$                   | see general notes* |
| H6201b_1 | TrAlMblScCl    | $\text{HOCl(aq)} \rightarrow \text{HOCl}$                                  | $k_{\text{exb}}(\text{ind\_H0Cl})$                   | see general notes* |
| H7000f_1 | TrAlMblScBr    | $\text{Br}_2 \rightarrow \text{Br}_2(\text{aq})$                           | $k_{\text{exf}}(\text{ind\_Br2})$                    | see general notes* |
| H7000b_1 | TrAlMblScBr    | $\text{Br}_2(\text{aq}) \rightarrow \text{Br}_2$                           | $k_{\text{exb}}(\text{ind\_Br2})$                    | see general notes* |
| H7200f_1 | TrAlMblScScmBr | $\text{HBr} \rightarrow \text{HBr(aq)}$                                    | $k_{\text{exf}}(\text{ind\_HBr})$                    | see general notes* |
| H7200b_1 | TrAlMblScScmBr | $\text{HBr(aq)} \rightarrow \text{HBr}$                                    | $k_{\text{exb}}(\text{ind\_HBr})$                    | see general notes* |
| H7201f_1 | TrAlMblScBr    | $\text{HOBr} \rightarrow \text{HOBr(aq)}$                                  | $k_{\text{exf}}(\text{ind\_H0Br})$                   | see general notes* |
| H7201b_1 | TrAlMblScBr    | $\text{HOBr(aq)} \rightarrow \text{HOBr}$                                  | $k_{\text{exb}}(\text{ind\_H0Br})$                   | see general notes* |
| H7600f_1 | TrAlMblScBrCl  | $\text{BrCl} \rightarrow \text{BrCl(aq)}$                                  | $k_{\text{exf}}(\text{ind\_BrCl})$                   | see general notes* |
| H7600b_1 | TrAlMblScBrCl  | $\text{BrCl(aq)} \rightarrow \text{BrCl}$                                  | $k_{\text{exb}}(\text{ind\_BrCl})$                   | see general notes* |
| H9100f_1 | TrAlMblScScmS  | $\text{SO}_2 \rightarrow \text{SO}_2(\text{aq})$                           | $k_{\text{exf}}(\text{ind\_S02})$                    | see general notes* |
| H9100b_1 | TrAlMblScScmS  | $\text{SO}_2(\text{aq}) \rightarrow \text{SO}_2$                           | $k_{\text{exb}}(\text{ind\_S02})$                    | see general notes* |
| H9200_1  | TrAlMblScScmS  | $\text{H}_2\text{SO}_4 \rightarrow \text{H}_2\text{SO}_4(\text{aq})$       | $\text{xnom7sulf*k}_{\text{exf}}(\text{ind\_H2S04})$ | see general notes* |

## General notes

The forward ( $k_{\text{exf}}$ ) and backward ( $k_{\text{exb}}$ ) rate coefficients are calculated in sub-

routine `scav_aero_calc_k_ex` in the file `messy_scav_aero.f90` using accommodation coefficients and Henry’s law constants from chemprop (see `chemprop.pdf`). For uptake of X (X =  $\text{N}_2\text{O}_5$ ,  $\text{ClNO}_3$ , or  $\text{BrNO}_3$ ) and subsequent reaction with  $\text{H}_2\text{O}$ ,  $\text{Cl}^-$ , and  $\text{Br}^-$  in H3201, H6300, H6301, H6302, H7300, H7301, H7302, H7601,

and H7602, we define:

$$k_{\text{exf}}(\text{X}) = \frac{k_{\text{mt}}(\text{X}) \times \text{LWC}}{[\text{H}_2\text{O}] + 5 \times 10^2 [\text{Cl}^-] + 3 \times 10^5 [\text{Br}^-]}$$

Here,  $k_{\text{mt}}$  = mass transfer coefficient, and LWC = liquid water content of the aerosol. The total uptake rate

of X is only determined by  $k_{\text{mt}}$ . The factors only affect the branching between hydrolysis and the halide reactions. The factor  $5 \times 10^2$  was chosen such that the chloride reaction dominates over hydrolysis at about  $[\text{Cl}^-] > 0.1 \text{ M}$  (see Fig. 3 in Behnke et al. (1997)), i.e. when the ratio  $[\text{H}_2\text{O}]/[\text{Cl}^-]$  is less than  $5 \times 10^2$ . The ratio

$5 \times 10^2 / 3 \times 10^5$  was chosen such that the reactions with chloride and bromide are roughly equal for sea water composition (Behnke et al., 1994). These ratios were measured for uptake of  $\text{N}_2\text{O}_5$ . Here, they are also used for  $\text{ClNO}_3$  and  $\text{BrNO}_3$ .

Table 4: Heterogeneous reactions

| # | labels | reaction | rate coefficient | reference |
|---|--------|----------|------------------|-----------|
|---|--------|----------|------------------|-----------|

## General notes

Heterogeneous reaction rates are calculated with an external module (e.g., SCAV\_KHET) and then supplied to the SCAV chemistry (see [www.messy-interface.org](http://www.messy-interface.org) for details)



Table 5: Acid-base and other equilibria

| #      | labels         | reaction                                                                         | $K_0[M^{m-n}]$ | $-\Delta H/R[K]$ | reference                           |
|--------|----------------|----------------------------------------------------------------------------------|----------------|------------------|-------------------------------------|
| EQ20_1 | TrAlSc         | $\text{HO}_2 \rightleftharpoons \text{O}_2^- + \text{H}^+$                       | 1.6E-5         |                  | Weinstein-Lloyd and Schwartz (1991) |
| EQ21_1 | TrAlMblScScm   | $\text{H}_2\text{O} \rightleftharpoons \text{H}^+ + \text{OH}^-$                 | 1.0E-16        | -6716            | Chameides (1984)                    |
| EQ30_1 | TrAlMblScScmN  | $\text{NH}_4^+ \rightleftharpoons \text{H}^+ + \text{NH}_3$                      | 5.88E-10       | -2391            | Chameides (1984)                    |
| EQ31_1 | TrAlScN        | $\text{HONO} \rightleftharpoons \text{H}^+ + \text{NO}_2^-$                      | 5.1E-4         | -1260            | Schwartz and White (1981)           |
| EQ32_1 | TrAlMblScScmN  | $\text{HNO}_3 \rightleftharpoons \text{H}^+ + \text{NO}_3^-$                     | 15             | 8700             | Davis and de Bruin (1964)           |
| EQ33_1 | TrAlScN        | $\text{HNO}_4 \rightleftharpoons \text{NO}_4^- + \text{H}^+$                     | 1.E-5          |                  | Warneck (1999)                      |
| EQ40_1 | TrAlMblScScm   | $\text{CO}_2 \rightleftharpoons \text{H}^+ + \text{HCO}_3^-$                     | 4.3E-7         | -913             | Chameides (1984)*                   |
| EQ41_1 | TrAlScScm      | $\text{HCOOH} \rightleftharpoons \text{H}^+ + \text{HCOO}^-$                     | 1.8E-4         |                  | Weast (1980)                        |
| EQ42_1 | TrAraScScmC    | $\text{CH}_3\text{COOH} \rightleftharpoons \text{H}^+ + \text{CH}_3\text{COO}^-$ | 1.754E-5       |                  | Fisher and Barnes (1972)*           |
| EQ61_1 | TrAlMblScScmCl | $\text{HCl} \rightleftharpoons \text{H}^+ + \text{Cl}^-$                         | 1.7E6          | 6896             | Marsh and McElroy (1985)            |
| EQ62_1 | TrAlScCl       | $\text{HOCl} \rightleftharpoons \text{H}^+ + \text{ClO}^-$                       | 3.2E-8         |                  | Lax (1969)                          |
| EQ71_1 | TrAlMblScScmBr | $\text{HBr} \rightleftharpoons \text{H}^+ + \text{Br}^-$                         | 1.0E9          |                  | Lax (1969)                          |
| EQ72_1 | TrAlScBr       | $\text{HOBr} \rightleftharpoons \text{H}^+ + \text{BrO}^-$                       | 2.3E-9         | -3091            | Kelley and Tartar (1956)*           |
| EQ90_1 | TrAlMblScScmS  | $\text{SO}_2 \rightleftharpoons \text{H}^+ + \text{HSO}_3^-$                     | 1.7E-2         | 2090             | Chameides (1984)                    |
| EQ91_1 | TrAlMblScScmS  | $\text{HSO}_3^- \rightleftharpoons \text{H}^+ + \text{SO}_3^{2-}$                | 6.0E-8         | 1120             | Chameides (1984)                    |
| EQ92_1 | TrAlMblScScmS  | $\text{HSO}_4^- \rightleftharpoons \text{H}^+ + \text{SO}_4^{2-}$                | 1.2E-2         | 2720             | Seinfeld and Pandis (1998)          |
| EQ93_1 | TrAlMblScScmS  | $\text{H}_2\text{SO}_4 \rightleftharpoons \text{H}^+ + \text{HSO}_4^-$           | 1.0E3          |                  | Seinfeld and Pandis (1998)          |

## Specific notes

EQ40\_1: For  $pK_a(\text{CO}_2)$ , see also Dickson and Millero (1987).

EQ42\_1: The  $pK_A$  has a minimum near 25 °C, the temperature dependence is therefore small.

EQ72\_1: For  $pK_a(\text{HOBr})$ , see also Keller-Rudek et al. (1992).

Table 6: Aqueous phase reactions

| #        | labels        | reaction                                            | $k_0 [M^{1-n}s^{-1}]$ | $-E_a/R[K]$ | reference                       |
|----------|---------------|-----------------------------------------------------|-----------------------|-------------|---------------------------------|
| A1000_1  | TrAlSc        | $O_3 + O_2^- \rightarrow OH + OH^-$                 | 1.5E9                 |             | Sehested et al. (1983)          |
| A2100_1  | TrAlSc        | $OH + O_2^- \rightarrow OH^-$                       | 1.0E10                |             | Sehested et al. (1968)          |
| A2101_1  | TrAlSc        | $OH + OH \rightarrow H_2O_2$                        | 5.5E9                 |             | Buxton et al. (1988)            |
| A2102_1  | TrAlSc        | $HO_2 + O_2^- \rightarrow H_2O_2 + OH^-$            | 1.0E8                 | -900        | Christensen and Sehested (1988) |
| A2103_1  | TrAlSc        | $HO_2 + OH \rightarrow H_2O$                        | 7.1E9                 |             | Sehested et al. (1968)          |
| A2104_1  | TrAlSc        | $HO_2 + HO_2 \rightarrow H_2O_2$                    | 9.7E5                 | -2500       | Christensen and Sehested (1988) |
| A2105_1  | TrAlSc        | $H_2O_2 + OH \rightarrow HO_2$                      | 2.7E7                 | -1684       | Christensen et al. (1982)       |
| A3100_1  | TrAlScN       | $NO_2^- + O_3 \rightarrow NO_3^-$                   | 5.0E5                 | -6950       | Damschen and Martin (1983)      |
| A3101_1  | TrAlScN       | $NO_2 + NO_2 \rightarrow HNO_3 + HONO$              | 1.0E8                 |             | Lee and Schwartz (1981)         |
| A3102_1  | TrAlScN       | $NO_4^- \rightarrow NO_2^-$                         | 8.0E1                 |             | Warneck (1999)                  |
| A3200_1  | TrAlScN       | $NO_2 + HO_2 \rightarrow HNO_4$                     | 1.8E9                 |             | Warneck (1999)                  |
| A3201_1  | TrAlScN       | $NO_2^- + OH \rightarrow NO_2 + OH^-$               | 1.0E10                |             | Wingenter et al. (1999)         |
| A3202_1  | TrAlScN       | $NO_3 + OH^- \rightarrow NO_3^- + OH$               | 8.2E7                 | -2700       | Exner et al. (1992)             |
| A3203_1  | TrAlScN       | $HONO + OH \rightarrow NO_2$                        | 1.0E10                |             | Barker et al. (1970)            |
| A3204_1  | TrAlScN       | $HONO + H_2O_2 + H^+ \rightarrow HNO_3 + H^+$       | 4.6E3                 | -6800       | Damschen and Martin (1983)      |
| A4100_1  | TrAlSc        | $CO_3^- + O_2^- \rightarrow HCO_3^- + OH^-$         | 6.5E8                 |             | Ross et al. (1992)              |
| A4101_1  | TrAlSc        | $CO_3^- + H_2O_2 \rightarrow HCO_3^- + HO_2$        | 4.3E5                 |             | Ross et al. (1992)              |
| A4102_1  | TrAlSc        | $HCOO^- + CO_3^- \rightarrow 2 HCO_3^- + HO_2$      | 1.5E5                 |             | Ross et al. (1992)              |
| A4103_1  | TrAlSc        | $HCOO^- + OH \rightarrow OH^- + HO_2 + CO_2$        | 3.1E9                 | -1240       | Chin and Wine (1994)            |
| A4104_1  | TrAlSc        | $HCO_3^- + OH \rightarrow CO_3^-$                   | 8.5E6                 |             | Ross et al. (1992)              |
| A4105_1  | TrAlSc        | $HCHO + OH \rightarrow HCOOH + HO_2$                | 7.7E8                 | -1020       | Chin and Wine (1994)            |
| A4106_1  | TrAlSc        | $HCOOH + OH \rightarrow HO_2 + CO_2$                | 1.1E8                 | -991        | Chin and Wine (1994)            |
| A4107_1  | TrAlSc        | $CH_3OO + O_2^- \rightarrow CH_3OOH + OH^-$         | 5.0E7                 |             | Jacob (1986)                    |
| A4108_1  | TrAlSc        | $CH_3OO + HO_2 \rightarrow CH_3OOH$                 | 4.3E5                 |             | Jacob (1986)                    |
| A4109_1  | TrAlSc        | $CH_3OH + OH \rightarrow HCHO + HO_2$               | 9.7E8                 |             | Buxton et al. (1988)            |
| A4110a_1 | TrAlSc        | $CH_3OOH + OH \rightarrow CH_3OO$                   | 2.7E7                 | -1715       | Jacob (1986)                    |
| A4110b_1 | TrAlSc        | $CH_3OOH + OH \rightarrow HCHO + OH$                | 1.1E7                 | -1715       | Jacob (1986)                    |
| A9100_1  | TrAlScS       | $SO_3^- + O_2 \rightarrow SO_5^-$                   | 1.5E9                 |             | Huie and Neta (1987)            |
| A9101_1  | TrAlMblScScmS | $SO_3^{2-} + O_3 \rightarrow SO_4^{2-}$             | 1.5E9                 | -5300       | Hoffmann (1986)                 |
| A9102_1  | TrAlScS       | $SO_4^- + O_2^- \rightarrow SO_4^{2-}$              | 3.5E9                 |             | Jiang et al. (1992)             |
| A9103_1  | TrAlScS       | $SO_4^- + SO_3^{2-} \rightarrow SO_3^- + SO_4^{2-}$ | 4.6E8                 |             | Huie and Neta (1987)            |
| A9104_1  | TrAlScS       | $SO_5^- + O_2^- \rightarrow HSO_5^- + OH^-$         | 2.3E8                 |             | Buxton et al. (1996)            |
| A9200_1  | TrAlScS       | $SO_3^{2-} + OH \rightarrow SO_3^- + OH^-$          | 5.5E9                 |             | Buxton et al. (1988)            |
| A9201_1  | TrAlScS       | $SO_4^- + OH \rightarrow HSO_5^-$                   | 1.0E9                 |             | Jiang et al. (1992)             |

Table 6: Aqueous phase reactions (...continued)

| #       | labels        | reaction                                                         | $k_0 [M^{1-n}s^{-1}]$ | $-E_a/R[K]$ | reference                     |
|---------|---------------|------------------------------------------------------------------|-----------------------|-------------|-------------------------------|
| A9202_1 | TrAlScS       | $SO_4^- + HO_2 \rightarrow SO_4^{2-} + H^+$                      | 3.5E9                 |             | Jiang et al. (1992)           |
| A9203_1 | TrAlScS       | $SO_4^- + H_2O \rightarrow SO_4^{2-} + H^+ + OH$                 | 1.1E1                 | -1110       | Herrmann et al. (1995)        |
| A9204_1 | TrAlScS       | $SO_4^- + H_2O_2 \rightarrow SO_4^{2-} + H^+ + HO_2$             | 1.2E7                 |             | Wine et al. (1989)            |
| A9205_1 | TrAlScS       | $HSO_3^- + O_2 \rightarrow SO_4^{2-} + OH$                       | 3.0E3                 |             | see note*                     |
| A9206_1 | TrAlMblScScmS | $HSO_3^- + O_3 \rightarrow SO_4^{2-} + H^+$                      | 3.7E5                 | -5500       | Hoffmann (1986)               |
| A9207_1 | TrAlScS       | $HSO_3^- + OH \rightarrow SO_3^-$                                | 4.5E9                 |             | Buxton et al. (1988)          |
| A9208_1 | TrAlScS       | $HSO_3^- + HO_2 \rightarrow SO_4^{2-} + OH + H^+$                | 3.0E3                 |             | see note*                     |
| A9209_1 | TrAlMblScScmS | $HSO_3^- + H_2O_2 \rightarrow SO_4^{2-} + H^+$                   | 5.2E6                 | -3650       | Martin and Damschen (1981)    |
| A9210_1 | TrAlScS       | $HSO_3^- + SO_4^- \rightarrow SO_3^- + SO_4^{2-} + H^+$          | 8.0E8                 |             | Huie and Neta (1987)          |
| A9212_1 | TrAlScS       | $HSO_3^- + HSO_5^- + H^+ \rightarrow 2 HSO_4^- + H^+$            | 7.1E6                 |             | Betterton and Hoffmann (1988) |
| A9301_1 | TrAlScNS      | $SO_4^- + NO_3^- \rightarrow SO_4^{2-} + NO_3$                   | 5.0E4                 |             | Exner et al. (1992)           |
| A9302_1 | TrAlScNS      | $SO_4^{2-} + NO_3 \rightarrow NO_3^- + SO_4^-$                   | 1.0E5                 |             | Løgager et al. (1993)         |
| A9304_1 | TrAlScNS      | $HSO_3^- + NO_3 \rightarrow SO_3^- + NO_3^- + H^+$               | 1.4E9                 | -2000       | Exner et al. (1992)           |
| A9305_1 | TrAlScNS      | $HSO_3^- + HNO_4 \rightarrow HSO_4^- + NO_3^- + H^+$             | 3.1E5                 |             | Warneck (1999)                |
| A9400_1 | TrAlScS       | $SO_3^{2-} + HCHO \rightarrow CH_2OH SO_3^- + OH^-$              | 1.4E4                 |             | Boyce and Hoffmann (1984)*    |
| A9401_1 | TrAlScS       | $SO_3^{2-} + CH_3OOH + H^+ \rightarrow SO_4^{2-} + H^+ + CH_3OH$ | 1.6E7                 | -3800       | Lind et al. (1987)            |
| A9402_1 | TrAlScS       | $HSO_3^- + HCHO \rightarrow CH_2OH SO_3^-$                       | 4.3E-1                |             | Boyce and Hoffmann (1984)*    |
| A9403_1 | TrAlScS       | $HSO_3^- + CH_3OOH + H^+ \rightarrow HSO_4^- + H^+ + CH_3OH$     | 1.6E7                 | -3800       | Lind et al. (1987)            |
| A9404_1 | TrAlScS       | $CH_2OH SO_3^- + OH^- \rightarrow SO_3^{2-} + HCHO$              | 3.6E3                 |             | Seinfeld and Pandis (1998)    |

## Specific notes

A9205\_1: D. Sedlak, pers. comm. (1993).

A9208\_1: D. Sedlak, pers. comm. (1993).

A9400\_1: Product  $2.48 \times 10^7 \times 5.5 \times 10^{-4}$  considering the hydrated form of HCHO.

A9402\_1: Product  $790 \times 5.5 \times 10^{-4}$  considering the hydrated form of HCHO.

## References

- Barker, G. C., Fowles, P., and Stringer, B.: Pulse radiolytic induced transient electrical conductance in liquid solutions, *Trans. Faraday Soc.*, 66, 1509–1519, doi:10.1039/TF9706601509, 1970.
- Behnke, W., Scheer, V., and Zetzsch, C.: Production of  $\text{BrNO}_2$ ,  $\text{Br}_2$  and  $\text{ClNO}_2$  from the reaction between sea spray aerosol and  $\text{N}_2\text{O}_5$ , *J. Aerosol Sci.*, 25, S277–S278, doi:10.1016/0021-8502(94)90369-7, 1994.
- Behnke, W., George, C., Scheer, V., and Zetzsch, C.: Production and decay of  $\text{ClNO}_2$  from the reaction of gaseous  $\text{N}_2\text{O}_5$  with  $\text{NaCl}$  solution: Bulk and aerosol experiments, *J. Geophys. Res.*, 102D, 3795–3804, doi:10.1029/96JD03057, 1997.
- Betterton, E. A. and Hoffmann, M. R.: Oxidation of aqueous  $\text{SO}_2$  by peroxymonosulfate, *J. Phys. Chem.*, 92, 5962–5965, doi:10.1021/J100332A025, 1988.
- Boyce, S. D. and Hoffmann, M. R.: Kinetics and mechanism of the formation of hydroxymethanesulfonic acid at low pH, *J. Phys. Chem.*, 88, 4740–4746, doi:10.1021/j150664a059, 1984.
- Buxton, G. V., Greenstock, C. L., Helman, W. P., and Ross, A. B.: Critical review of rate constants for reactions of hydrated electrons, hydrogen atoms and hydroxyl radicals ( $\cdot\text{OH}/\cdot\text{O}^-$ ) in aqueous solution, *J. Phys. Chem. Ref. Data*, 17, 513–886, doi:10.1063/1.555805, 1988.
- Buxton, G. V., McGowan, S., Salmon, G. A., Williams, J. E., and Wood, N. D.: A study of the spectra and reactivity of oxysulphur-radical anions involved in the chain oxidation of  $\text{S(IV)}$ : A pulse and  $\gamma$ -radiolysis study, *Atmos. Environ.*, 30, 2483–2493, doi:10.1016/1352-2310(95)00473-4, 1996.
- Chameides, W. L.: The photochemistry of a remote marine stratiform cloud, *J. Geophys. Res.*, 89D, 4739–4755, doi:10.1029/JD089ID03P04739, 1984.
- Chin, M. and Wine, P. H.: A temperature-dependent competitive kinetics study of the aqueous-phase reactions of OH radicals with formate, formic acid, acetate, acetic acid, and hydrated formaldehyde, in: *Aquatic and Surface Photochemistry*, edited by Helz, G. R., Zepp, R. G., and Crosby, D. G., pp. 85–96, A. F. Lewis, NY, 1994.
- Christensen, H. and Sehested, K.:  $\text{HO}_2$  and  $\text{O}_2^-$  radicals at elevated temperatures, *J. Phys. Chem.*, 92, 3007–3011, doi:10.1021/J100321A060, 1988.
- Christensen, H., Sehested, K., and Corfitzen, H.: Reactions of hydroxyl radicals with hydrogen peroxide at ambient and elevated temperatures, *J. Phys. Chem.*, 86, 1588–1590, doi:10.1021/J100206A023, 1982.
- Damschen, D. E. and Martin, L. R.: Aqueous aerosol oxidation of nitrous acid by  $\text{O}_2$ ,  $\text{O}_3$  and  $\text{H}_2\text{O}_2$ , *Atmos. Environ.*, 17, 2005–2011, doi:10.1016/0004-6981(83)90357-8, 1983.
- Davis, Jr., W. and de Bruin, H. J.: New activity coefficients of 0-100 per cent aqueous nitric acid, *J. Inorg. Nucl. Chem.*, 26, 1069–1083, doi:10.1016/0022-1902(64)80268-2, 1964.
- Dickson, A. G. and Millero, F. J.: A comparison of the equilibrium constants for the dissociation of carbonic acid in seawater media, *Deep-Sea Res. A*, 34, 1733–1743, 1987.
- Exner, M., Herrmann, H., and Zellner, R.: Laser-based studies of reactions of the nitrate radical in aqueous solution, *Ber. Bunsenges. Phys. Chem.*, 96, 470–477, doi:10.1002/BBPC.19920960347, 1992.
- Fisher, J. R. and Barnes, H. L.: The ion-product constant of water to  $350^\circ$ , *J. Phys. Chem.*, 76, 90–99, doi:10.1021/J100645A016, 1972.
- Herrmann, H., Reese, A., and Zellner, R.: Time resolved UV/VIS diode array absorption spectroscopy of  $\text{SO}_x^-$  ( $x=3, 4, 5$ ) radical anions in aqueous solution, *J. Mol. Struct.*, 348, 183–186, doi:10.1016/0022-2860(95)08619-7, 1995.
- Hoffmann, M. R.: On the kinetics and mechanism of oxidation of aquated sulfur dioxide by ozone, *Atmos. Environ.*, 20, 1145–1154, doi:10.1016/0004-6981(86)90147-2, 1986.
- Huie, R. E. and Neta, P.: Rate constants for some oxidations of  $\text{S(IV)}$  by radicals in aqueous solutions, *Atmos. Environ.*, 21, 1743–1747, doi:10.1016/0004-6981(87)90113-2, 1987.
- Jacob, D. J.: Chemistry of OH in remote clouds and its role in the production of formic acid and peroxymonosulfate, *J. Geophys. Res.*, 91D, 9807–9826, doi:10.1029/JD091ID09P09807, 1986.
- Jenkin, M., Saunders, S. M., and Pilling, M. J.: The tropospheric degradation of volatile organic compounds: A protocol for mechanism development, *Atmos. Environ.*, 31, 81–104, doi:10.1016/S1352-2310(96)00105-7, 1997.
- Jiang, P.-Y., Katsumura, Y., Nagaishi, R., Domae, M., Ishikawa, K., Ishigure, K., and Yoshida, Y.: Pulse radiolysis study of concentrated sulfuric acid solutions. Formation mechanism, yield and reactivity of sulfate radicals, *J. Chem. Soc. Faraday Trans.*, 88, 1653–1658, doi:10.1039/FT9928801653, 1992.
- Keller-Rudek, H., Koschel, D., Merlet, P., Ohms-Bredemann, U., Wagner, J., and Wietelmann, A.:

- Gmelin Handbook of Inorganic and Organometallic Chemistry, 8th Edition, Br, Bromine, Supplement Volume B2, Compounds with Oxygen and Nitrogen, Springer Verlag, Berlin, 1992.
- Kelley, C. M. and Tartar, H. V.: On the system: bromine-water, *J. Am. Chem. Soc.*, 78, 5752–5756, doi:10.1021/JA01603A010, 1956.
- Lax, E.: Taschenbuch für Chemiker und Physiker, Springer Verlag, Berlin, 1969.
- Lee, Y.-N. and Schwartz, S. E.: Reaction kinetics of nitrogen dioxide with liquid water at low partial pressure, *J. Phys. Chem.*, 85, 840–848, doi:10.1021/J150607A022, 1981.
- Lind, J. A., Lazrus, A. L., and Kok, G. L.: Aqueous phase oxidation of sulfur(IV) by hydrogen peroxide, methylhydroperoxide, and peroxyacetic acid, *J. Geophys. Res.*, 92D, 4171–4177, doi:10.1029/JD092ID04P04171, 1987.
- Løgager, T., Sehested, K., and Holcman, J.: Rate constants of the equilibrium reactions  $\text{SO}_4 + \text{HNO}_3 \rightleftharpoons \text{HSO}_4^- + \text{NO}_3$  and  $\text{SO}_4 + \text{NO}_3 \rightleftharpoons \text{SO}_4^{2-} + \text{NO}_3$ , *Radiat. Phys. Chem.*, 41, 539–543, doi:10.1016/0969-806X(93)90017-O, 1993.
- Marsh, A. R. W. and McElroy, W. J.: The dissociation constant and Henry’s law constant of HCl in aqueous solution, *Atmos. Environ.*, 19, 1075–1080, doi:10.1016/0004-6981(85)90192-1, 1985.
- Martin, L. R. and Damschen, D. E.: Aqueous oxidation of sulfur dioxide by hydrogen peroxide at low pH, *Atmos. Environ.*, 15, 1615–1621, doi:10.1016/0004-6981(81)90146-3, 1981.
- Rickard, A. and Pascoe, S.: The Master Chemical Mechanism (MCM), <http://mcm.leeds.ac.uk>, 2009.
- Ross, A. B., Mallard, W. G., Helman, W. P., Bielski, B. H. J., Buxton, G. V., Cabelli, D. E., Greenstock, C. L., Huie, R. E., and Neta, P.: NDRL-NIST Solution Kinetics Database: - Ver. 1, National Institute of Standards and Technology, Gaithersburg, MD, 1992.
- Schwartz, S. E. and White, W. H.: Solubility equilibria of the nitrogen oxides and oxyacids in dilute aqueous solution, in: *Advances in Environmental Science and Engineering*, edited by Pfafflin, J. R. and Ziegler, E. N., vol. 4, pp. 1–45, Gordon and Breach Science Publishers, NY, 1981.
- Sehested, K., Rasmussen, O. L., and Fricke, H.: Rate constants of OH with  $\text{HO}_2$ ,  $\text{O}_2^-$ , and  $\text{H}_2\text{O}_2^+$  from hydrogen peroxide formation in pulse-irradiated oxygenated water, *J. Phys. Chem.*, 72, 626–631, doi:10.1021/J100848A040, 1968.
- Sehested, K., Holcman, J., and Hart, E. J.: Rate constants and products of the reactions of  $\text{e}_{\text{aq}}^-$ ,  $\text{O}_2^-$  and H with ozone in aqueous solutions, *J. Phys. Chem.*, 87, 1951–1954, doi:10.1021/J100234A024, 1983.
- Seinfeld, J. H. and Pandis, S. N.: *Atmospheric Chemistry and Physics*, John Wiley & Sons, Inc., 1998.
- Wallington, T. J., Ammann, M., Cox, R. A., Crowley, J. N., Herrmann, H., Jenkin, M. E., McNeill, V., Mellouki, A., Rossi, M. J., and Troe, J.: IUPAC Task group on atmospheric chemical kinetic data evaluation: Evaluated kinetic data, <http://iupac.pole-ether.fr>, 2018.
- Warneck, P.: The relative importance of various pathways for the oxidation of sulfur dioxide and nitrogen dioxide in sunlit continental fair weather clouds, *Phys. Chem. Chem. Phys.*, 1, 5471–5483, doi:10.1039/A906558J, 1999.
- Weast, R. C., ed.: *CRC Handbook of Chemistry and Physics*, 61st Edition, CRC Press, Inc., Boca Raton, FL, 1980.
- Weinstein-Lloyd, J. and Schwartz, S. E.: Low-intensity radiolysis study of free-radical reactions in cloudwater:  $\text{H}_2\text{O}_2$  production and destruction, *Environ. Sci. Technol.*, 25, 791–800, doi:10.1021/ES00016A027, 1991.
- Wine, P. H., Tang, Y., Thorn, R. P., Wells, J. R., and Davis, D. D.: Kinetics of aqueous phase reactions of the  $\text{SO}_4^-$  radical with potential importance in cloud chemistry, *J. Geophys. Res.*, 94D, 1085–1094, doi:10.1029/JD094ID01P01085, 1989.
- Wingenter, O. W., Sive, B. C., Blake, N. J., and Rowland, F. S.: Atomic chlorine concentrations determined from ethane and hydroxyl measurements made over the Central Pacific Ocean, *Eos, Trans. AGU (Abstract Supplement)*, 80, F149–F150, 1999.
