# Supplementary material for: Ozone source attribution in polluted European areas during summer 2017 as simulated with MECO(n)
Source: Copernicus journal article supplement (doi:10.5194/acp-24-13503-2024), 2024-12-09
Supplement: Supplementary file 4 [file acp-24-13503-2024-supplement.zip]

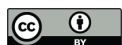

## *Supplement of*

# **Ozone source attribution in polluted European areas during summer 2017 as simulated with MECO(n)**

**Markus Kilian et al.**

*Correspondence to:* Mariano Mertens ([mariano.mertens@dlr.de](mailto:mariano.mertens@dlr.de))

- [acp-24-13503-2024-supplement-title-page.pdf](#)
- [supplement](#)
  - [mechanism\\_mecca.pdf](#)
  - [mechanism\\_scav.pdf](#)
  - [readme.txt](#)
  - [supplement.pdf](#)

The copyright of individual parts of the supplement might differ from the article licence.
